# Supplementary material
Source: MDPI journal article supplement (https://www.mdpi.com/2073-4344/11/8/877)

# Supporting Information

## Environmentally Friendly Nafion-catalyzed Synthesis of Substituted 2-Ethyl-3-Methylquinolines from Aniline and Propionaldehyde under Microwave Irradiation

Chieh-Kai Chan\*, Chien-Yu Lai and Cheng-Chung Wang\*

*Institute of Chemistry, Academia Sinica, Taipei 115, Taiwan*

E-mail: [ckc@gate.sinica.edu.tw](mailto:ckc@gate.sinica.edu.tw) and [wangcc7280@gate.sinica.edu.tw](mailto:wangcc7280@gate.sinica.edu.tw)

|                                                                                                              |             |
|--------------------------------------------------------------------------------------------------------------|-------------|
| I. Table of Compound Structures and Corresponding Page Numbers.....                                          | S-2         |
| II. Pictures of physical state of the recycle experiments.....                                               | S-3         |
| III. Crystal Data for Compound <b>3p</b> .....                                                               | S-4~S-7     |
| IV. Crystal Data for Compound <b>5a</b> .....                                                                | S-8~S-11    |
| V. Crystal Data for Compound <b>5b</b> .....                                                                 | S-12~S-15   |
| VI. Crystal Data for Compound <b>5d</b> .....                                                                | S-16~S-19   |
| VII. Scanned Photocopies of <sup>1</sup> H and <sup>13</sup> C NMR Spectra for Compounds <b>3a-3p</b> .....  | S-20~S-51   |
| VIII. Scanned Photocopies of <sup>1</sup> H and <sup>13</sup> C NMR Spectra for Compounds <b>5a-5s</b> ..... | S-52~S-89   |
| IX. Scanned Photocopies of <sup>1</sup> H and <sup>13</sup> C NMR Spectra for Compounds <b>6a-6h</b> .....   | S-90~S-105  |
| X. Scanned Photocopies of <sup>1</sup> H and <sup>13</sup> C NMR Spectra for Compounds <b>7</b> .....        | S-106~S-107 |

# Table of compound structures and corresponding page numbers

|                  |                 |                |                |                  |                  |
|------------------|-----------------|----------------|----------------|------------------|------------------|
| 3a (S-20~S-21)   | 3b (S-22~S-23)  | 3c (S-24~S-25) | 3d (S-26~S-27) | 3e (S-28~S-29)   | 3f (S-30~S-31)   |
|                  |                 |                |                |                  |                  |
| 3g (S-32~S-33)   | 3h (S-34~S-35)  | 3i (S-36~S-37) | 3j (S-38~S-39) | 3k (S-40~S-41)   | 3l (S-42~S-43)   |
|                  |                 |                |                |                  |                  |
| 3m (S-44~S-45)   | 3n (S-46~S-47)  | 3o (S-48~S-49) | 3p (S-50~S-51) | 5a (S-52~S-53)   | 5b (S-54~S-55)   |
|                  |                 |                |                |                  |                  |
| 5c (S-56~S-57)   | 5d (S-58~S-59)  | 5e (S-60~S-61) | 5f (S-62~S-63) | 5g (S-64~S-65)   | 5h (S-66~S-67)   |
|                  |                 |                |                |                  |                  |
| 5i (S-68~S-69)   | 5j (S-70~S-71)  | 5k (S-72~S-73) | 5l (S-74~S-75) | 5m (S-76~S-77)   | 5n (S-78~S-79)   |
|                  |                 |                |                |                  |                  |
| 5o (S-80~S-81)   | 5p (S-82~S-83)  | 5q (S-84~S-85) | 5r (S-86~S-87) | 5s (S-88~S-89)   | 6a (S-90~S-91)   |
|                  |                 |                |                |                  |                  |
| 6b (S-92~S-93)   | 6c (S-94~S-95)  | 6d (S-96~S-97) | 6e (S-98~S-99) | 6f (S-100~S-101) | 6g (S-102~S-103) |
|                  |                 |                |                |                  |                  |
| 6h (S-104~S-105) | 7 (S-106~S-107) |                |                |                  |                  |
|                  |                 |                |                |                  |                  |

**Table 1.** Physical state of the recycle experiments

| Experiment 1                                                                      | Experiment 2                                                                       | Experiment 3                                                                       | Experiment 4                                                                        | Experiment 5                                                                         |
|-----------------------------------------------------------------------------------|------------------------------------------------------------------------------------|------------------------------------------------------------------------------------|-------------------------------------------------------------------------------------|--------------------------------------------------------------------------------------|
|   |   |   |   |   |
| Experiment 6                                                                      | Experiment 7                                                                       | Experiment 8                                                                       | Experiment 9                                                                        | Experiment 10                                                                        |
|  |  |  |  |  |

# Crystal data and structure refinement for compound **3p**

(the thermal ellipsoid was drawn at the 50% probability level)

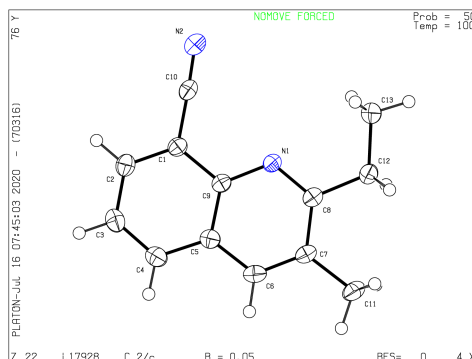

|                                        |                                                                                                                              |
|----------------------------------------|------------------------------------------------------------------------------------------------------------------------------|
| Identification code                    | i17928                                                                                                                       |
| Empirical formula                      | C <sub>13</sub> H <sub>12</sub> N <sub>2</sub>                                                                               |
| Formula weight                         | 196.25                                                                                                                       |
| Temperature                            | 100(2) K                                                                                                                     |
| Wavelength                             | 0.71073 Å                                                                                                                    |
| Crystal system                         | Monoclinic                                                                                                                   |
| Space group                            | C 2/c                                                                                                                        |
| Unit cell dimensions                   | $a = 20.8096(12)$ Å $a = 90^\circ$ .<br>$b = 8.4535(5)$ Å $b = 128.6800(10)^\circ$ .<br>$c = 15.3108(16)$ Å $g = 90^\circ$ . |
| Volume                                 | $2102.6(3)$ Å <sup>3</sup>                                                                                                   |
| Z, Density (calculated)                | 8, 1.240 Mg/m <sup>3</sup>                                                                                                   |
| Absorption coefficient                 | $0.075$ mm <sup>-1</sup>                                                                                                     |
| F(000)                                 | 832                                                                                                                          |
| Crystal size                           | $0.139 \times 0.103 \times 0.099$ mm <sup>3</sup>                                                                            |
| Theta range for data collection        | $2.687$ to $28.345^\circ$ .                                                                                                  |
| Index ranges                           | $-27 \leq h \leq 27$ , $-11 \leq k \leq 11$ , $-20 \leq l \leq 16$                                                           |
| Reflections collected                  | 28515                                                                                                                        |
| Independent reflections                | 2620 [R(int) = 0.1270]                                                                                                       |
| Completeness to theta = $25.242^\circ$ | 99.8 %                                                                                                                       |
| Absorption correction                  | Numerical                                                                                                                    |
| Max. and min. transmission             | 1 and 0.9039                                                                                                                 |
| Refinement method                      | Full-matrix least-squares on F <sup>2</sup>                                                                                  |
| Data / restraints / parameters         | 2620 / 0 / 138                                                                                                               |
| Goodness-of-fit on F <sup>2</sup>      | 1.022                                                                                                                        |
| Final R indices [I > 2σ(I)]            | R1 = 0.0459, wR2 = 0.1012                                                                                                    |
| R indices (all data)                   | R1 = 0.0971, wR2 = 0.1285                                                                                                    |
| Extinction coefficient                 | n/a                                                                                                                          |
| Largest diff. peak and hole            | 0.260 and -0.212 e.Å <sup>-3</sup>                                                                                           |



## checkCIF (basic structural check) running

---

Checking for embedded fcf data in CIF ...

Found embedded fcf data in CIF. Extracting fcf data from uploaded CIF, please wait ..

## checkCIF/PLATON (basic structural check)

---

Structure factors have been supplied for datablock(s) i17928

THIS REPORT IS FOR GUIDANCE ONLY. IF USED AS PART OF A REVIEW PROCEDURE FOR PUBLICATION, IT SHOULD NOT REPLACE THE EXPERTISE OF AN EXPERIENCED CRYSTALLOGRAPHIC REFEREE.

No syntax errors found.  
Please wait while processing ....

[CIF dictionary](#)  
[Interpreting this report](#)

[Structure factor report](#)

### Datablock: i17928

---

```

Bond precision:      C-C = 0.0020 A           Wavelength=0.71073
Cell:               a=20.8096(12)   b=8.4535(5)   c=15.3108(16)
                   alpha=90         beta=128.680(1) gamma=90
Temperature: 100 K

Volume              Calculated              Reported
2102.6(3)           2102.6(3)

Space group         C 2/c                   C 2/c
Hall group          -C 2yc                  -C 2yc
Moiety formula      C13 H12 N2              C13 H12 N2
Sum formula         C13 H12 N2              C13 H12 N2
Mr                  196.25                  196.25
Dx, g cm-3          1.240                   1.240
Z                   8                       8
Mu (mm-1)           0.075                   0.075
F000                832.0                   832.0
F000'               832.27
h,k,lmax            27,11,20                 27,11,20
Nref                2625                    2620
Tmin,Tmax           0.991,0.993              0.904,1.000
Tmin'               0.990
Correction method= # Reported T Limits: Tmin=0.904
Tmax=1.000 AbsCorr = NUMERICAL
Data completeness= 0.998           Theta(max)= 28.345
R(reflections)= 0.0459( 1647)      wR2(reflections)= 0.1285( 2620)
S = 1.022                      Npar= 138
  
```

---

The following ALERTS were generated. Each ALERT has the format

**test-name ALERT alert-type alert-level.**

Click on the hyperlinks for more details of the test.

---

#### Alert level C

[RINTA01\\_ALERT\\_3\\_C](#) The value of Rint is greater than 0.12  
Rint given 0.127

|                         |                       |                   |                   |                                                  |        |        |
|-------------------------|-----------------------|-------------------|-------------------|--------------------------------------------------|--------|--------|
| <a href="#">PLAT905</a> | <a href="#">ALERT</a> | <a href="#">3</a> | <a href="#">C</a> | Negative K value in the Analysis of Variance ... | -6.005 | Report |
| <a href="#">PLAT905</a> | <a href="#">ALERT</a> | <a href="#">3</a> | <a href="#">C</a> | Negative K value in the Analysis of Variance ... | -0.124 | Report |
| <a href="#">PLAT911</a> | <a href="#">ALERT</a> | <a href="#">3</a> | <a href="#">C</a> | Missing FCF Refl Between Thmin & STh/L= 0.600    | 2      | Report |

**Alert level G**

|                         |                       |                   |                   |                                                  |        |        |
|-------------------------|-----------------------|-------------------|-------------------|--------------------------------------------------|--------|--------|
| <a href="#">PLAT020</a> | <a href="#">ALERT</a> | <a href="#">3</a> | <a href="#">G</a> | The Value of Rint is Greater Than 0.12 .....     | 0.127  | Report |
| <a href="#">PLAT128</a> | <a href="#">ALERT</a> | <a href="#">4</a> | <a href="#">G</a> | Alternate Setting for Input Space Group C2/c     | I2/a   | Note   |
| <a href="#">PLAT883</a> | <a href="#">ALERT</a> | <a href="#">1</a> | <a href="#">G</a> | No Info/Value for _atom_sites_solution_primary . | Please | Do !   |
| <a href="#">PLAT910</a> | <a href="#">ALERT</a> | <a href="#">3</a> | <a href="#">G</a> | Missing # of FCF Reflection(s) Below Theta(Min). | 1      | Note   |
| <a href="#">PLAT912</a> | <a href="#">ALERT</a> | <a href="#">4</a> | <a href="#">G</a> | Missing # of FCF Reflections Above STh/L= 0.600  | 2      | Note   |
| <a href="#">PLAT913</a> | <a href="#">ALERT</a> | <a href="#">3</a> | <a href="#">G</a> | Missing # of Very Strong Reflections in FCF .... | 1      | Note   |
| <a href="#">PLAT978</a> | <a href="#">ALERT</a> | <a href="#">2</a> | <a href="#">G</a> | Number C-C Bonds with Positive Residual Density. | 9      | Info   |

0 **ALERT level A** = Most likely a serious problem - resolve or explain  
 0 **ALERT level B** = A potentially serious problem, consider carefully  
 4 **ALERT level C** = Check. Ensure it is not caused by an omission or oversight  
 7 **ALERT level G** = General information/check it is not something unexpected

1 ALERT type 1 CIF construction/syntax error, inconsistent or missing data  
 1 ALERT type 2 Indicator that the structure model may be wrong or deficient  
 7 ALERT type 3 Indicator that the structure quality may be low  
 2 ALERT type 4 Improvement, methodology, query or suggestion  
 0 ALERT type 5 Informative message, check

It is advisable to attempt to resolve as many as possible of the alerts in all categories. Often the minor alerts point to easily fixed oversights, errors and omissions in your CIF or refinement strategy, so attention to these fine details can be worthwhile. In order to resolve some of the more serious problems it may be necessary to carry out additional measurements or structure refinements. However, the purpose of your study may justify the reported deviations and the more serious of these should normally be commented upon in the discussion or experimental section of a paper or in the "special\_details" fields of the CIF. checkCIF was carefully designed to identify outliers and unusual parameters, but every test has its limitations and alerts that are not important in a particular case may appear. Conversely, the absence of alerts does not guarantee there are no aspects of the results needing attention. It is up to the individual to critically assess their own results and, if necessary, seek expert advice.

**Publication of your CIF in IUCr journals**

A basic structural check has been run on your CIF. These basic checks will be run on all CIFs submitted for publication in IUCr journals (*Acta Crystallographica*, *Journal of Applied Crystallography*, *Journal of Synchrotron Radiation*); however, if you intend to submit to *Acta Crystallographica Section C* or *E* or *IUCrData*, you should make sure that [full publication checks](#) are run on the final version of your CIF prior to submission.

**Publication of your CIF in other journals**

Please refer to the *Notes for Authors* of the relevant journal for any special instructions relating to CIF submission.

---

PLATON version of 08/07/2020; check.def file version of 17/06/2020

**Datablock i17928 - ellipsoid plot**

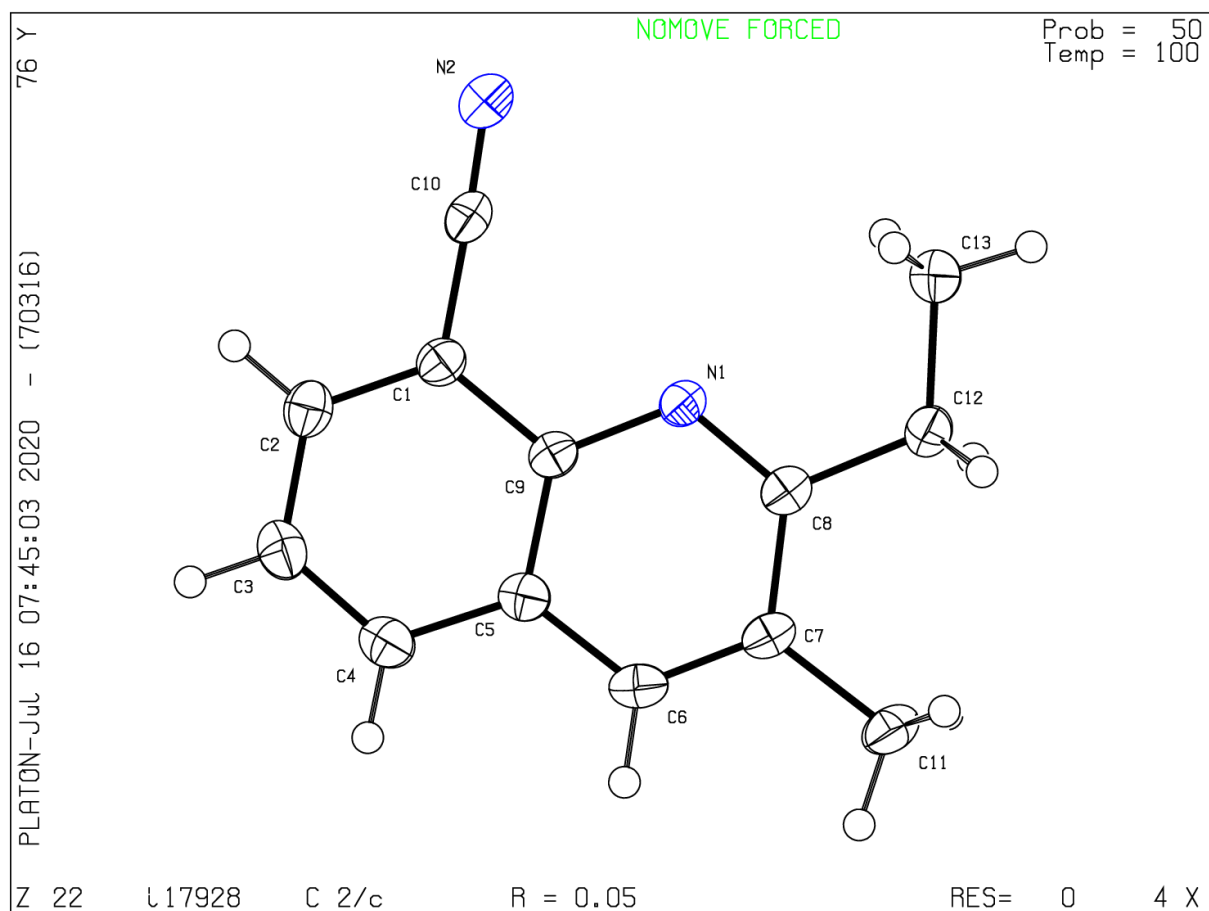

[Download CIF editor \(pubCIF\) from the IUCr](#)  
[Download CIF editor \(enCIFer\) from the CCDC](#)  
[Test a new CIF entry](#)

Crystal data and structure refinement for compound **5a**  
(the thermal ellipsoid was drawn at the 50% probability level)

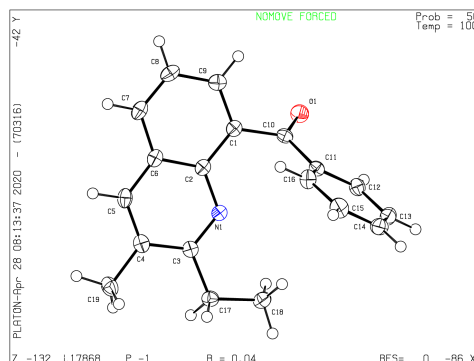

|                                   |                                             |                    |
|-----------------------------------|---------------------------------------------|--------------------|
| Identification code               | i17868                                      |                    |
| Empirical formula                 | C <sub>19</sub> H <sub>17</sub> N O         |                    |
| Formula weight                    | 275.33                                      |                    |
| Temperature                       | 100.0(2) K                                  |                    |
| Wavelength                        | 0.71073 Å                                   |                    |
| Crystal system                    | Triclinic                                   |                    |
| Space group                       | P -1                                        |                    |
| Unit cell dimensions              | a = 8.4108(3) Å                             | a = 103.454(2)°.   |
|                                   | b = 8.9126(3) Å                             | b = 97.603(2)°.    |
|                                   | c = 10.9019(4) Å                            | g = 111.8150(10)°. |
| Volume                            | 715.90(4) Å <sup>3</sup>                    |                    |
| Z, Density (calculated)           | 2, 1.277 Mg/m <sup>3</sup>                  |                    |
| Absorption coefficient            | 0.079 mm <sup>-1</sup>                      |                    |
| F(000)                            | 292                                         |                    |
| Crystal size                      | 0.238 x 0.208 x 0.149 mm <sup>3</sup>       |                    |
| Theta range for data collection   | 2.586 to 27.103°.                           |                    |
| Index ranges                      | -10<=h<=10, -11<=k<=11, -13<=l<=13          |                    |
| Reflections collected             | 31756                                       |                    |
| Independent reflections           | 3168 [R(int) = 0.0684]                      |                    |
| Completeness to theta = 25.242°   | 99.9 %                                      |                    |
| Absorption correction             | Numerical                                   |                    |
| Max. and min. transmission        | 1 and 0.9107                                |                    |
| Refinement method                 | Full-matrix least-squares on F <sup>2</sup> |                    |
| Data / restraints / parameters    | 3168 / 0 / 192                              |                    |
| Goodness-of-fit on F <sup>2</sup> | 1.027                                       |                    |
| Final R indices [I>2sigma(I)]     | R1 = 0.0387, wR2 = 0.0908                   |                    |
| R indices (all data)              | R1 = 0.0607, wR2 = 0.1047                   |                    |
| Extinction coefficient            | n/a                                         |                    |
| Largest diff. peak and hole       | 0.234 and -0.243 e.Å <sup>-3</sup>          |                    |

## checkCIF (basic structural check) running

Checking for embedded fcf data in CIF ...

Found embedded fcf data in CIF. Extracting fcf data from uploaded CIF, please wait ..

## checkCIF/PLATON (basic structural check)

Structure factors have been supplied for datablock(s) i17868

THIS REPORT IS FOR GUIDANCE ONLY. IF USED AS PART OF A REVIEW PROCEDURE FOR PUBLICATION, IT SHOULD NOT REPLACE THE EXPERTISE OF AN EXPERIENCED CRYSTALLOGRAPHIC REFEREE.

No syntax errors found.  
Please wait while processing ....

[CIF dictionary](#)  
[Interpreting this report](#)

[Structure factor report](#)

### Datablock: i17868

```

Bond precision:      C-C = 0.0020 A           Wavelength=0.71073
Cell:               a=8.4108(3)      b=8.9126(3)      c=10.9019(4)
                   alpha=103.454(2) beta=97.603(2)    gamma=111.815(1)
Temperature: 100 K

Volume              Calculated              Reported
                   715.90(5)                  715.90(4)
Space group         P -1                      P -1
Hall group          -P 1                      -P 1
Moiety formula      C19 H17 N O                C19 H17 N O
Sum formula         C19 H17 N O                C19 H17 N O
Mr                  275.34                     275.33
Dx, g cm-3          1.277                      1.277
Z                   2                          2
Mu (mm-1)           0.079                      0.079
F000                292.0                      292.0
F000'               292.11
h, k, lmax          10, 11, 13                  10, 11, 13
Nref                3170                       3168
Tmin, Tmax          0.981, 0.988                 0.911, 1.000
Tmin'               0.981
Correction method= # Reported T Limits: Tmin=0.911
Tmax=1.000 AbsCorr = NUMERICAL
Data completeness= 0.999          Theta(max)= 27.103
R(reflections)= 0.0387( 2410)      wR2(reflections)= 0.1047( 3168)
S = 1.027                      Npar= 192

```

The following ALERTS were generated. Each ALERT has the format

**test-name ALERT alert-type alert-level.**

Click on the hyperlinks for more details of the test.

#### Alert level C

[PLAT905\\_ALERT\\_3\\_C](#) Negative K value in the Analysis of Variance ... -0.177 Report

**Alert level G**

|                         |                       |                   |                   |                                                  |             |
|-------------------------|-----------------------|-------------------|-------------------|--------------------------------------------------|-------------|
| <a href="#">PLAT883</a> | <a href="#">ALERT</a> | <a href="#">1</a> | <a href="#">G</a> | No Info/Value for _atom_sites_solution_primary . | Please Do ! |
| <a href="#">PLAT910</a> | <a href="#">ALERT</a> | <a href="#">3</a> | <a href="#">G</a> | Missing # of FCF Reflection(s) Below Theta(Min). | 1 Note      |
| <a href="#">PLAT978</a> | <a href="#">ALERT</a> | <a href="#">2</a> | <a href="#">G</a> | Number C-C Bonds with Positive Residual Density. | 11 Info     |
| <a href="#">PLAT992</a> | <a href="#">ALERT</a> | <a href="#">5</a> | <a href="#">G</a> | Repd & Actual _reflns_number_gt Values Differ by | 1 Check     |

0 **ALERT level A** = Most likely a serious problem - resolve or explain  
 0 **ALERT level B** = A potentially serious problem, consider carefully  
 1 **ALERT level C** = Check. Ensure it is not caused by an omission or oversight  
 4 **ALERT level G** = General information/check it is not something unexpected

1 ALERT type 1 CIF construction/syntax error, inconsistent or missing data  
 1 ALERT type 2 Indicator that the structure model may be wrong or deficient  
 2 ALERT type 3 Indicator that the structure quality may be low  
 0 ALERT type 4 Improvement, methodology, query or suggestion  
 1 ALERT type 5 Informative message, check

It is advisable to attempt to resolve as many as possible of the alerts in all categories. Often the minor alerts point to easily fixed oversights, errors and omissions in your CIF or refinement strategy, so attention to these fine details can be worthwhile. In order to resolve some of the more serious problems it may be necessary to carry out additional measurements or structure refinements. However, the purpose of your study may justify the reported deviations and the more serious of these should normally be commented upon in the discussion or experimental section of a paper or in the "special\_details" fields of the CIF. checkCIF was carefully designed to identify outliers and unusual parameters, but every test has its limitations and alerts that are not important in a particular case may appear. Conversely, the absence of alerts does not guarantee there are no aspects of the results needing attention. It is up to the individual to critically assess their own results and, if necessary, seek expert advice.

**Publication of your CIF in IUCr journals**

A basic structural check has been run on your CIF. These basic checks will be run on all CIFs submitted for publication in IUCr journals (*Acta Crystallographica*, *Journal of Applied Crystallography*, *Journal of Synchrotron Radiation*); however, if you intend to submit to *Acta Crystallographica Section C* or *E* or *IUCrData*, you should make sure that [full publication checks](#) are run on the final version of your CIF prior to submission.

**Publication of your CIF in other journals**

Please refer to the *Notes for Authors* of the relevant journal for any special instructions relating to CIF submission.

PLATON version of 22/04/2020; check.def file version of 09/03/2020

**Datablock i17868 - ellipsoid plot**

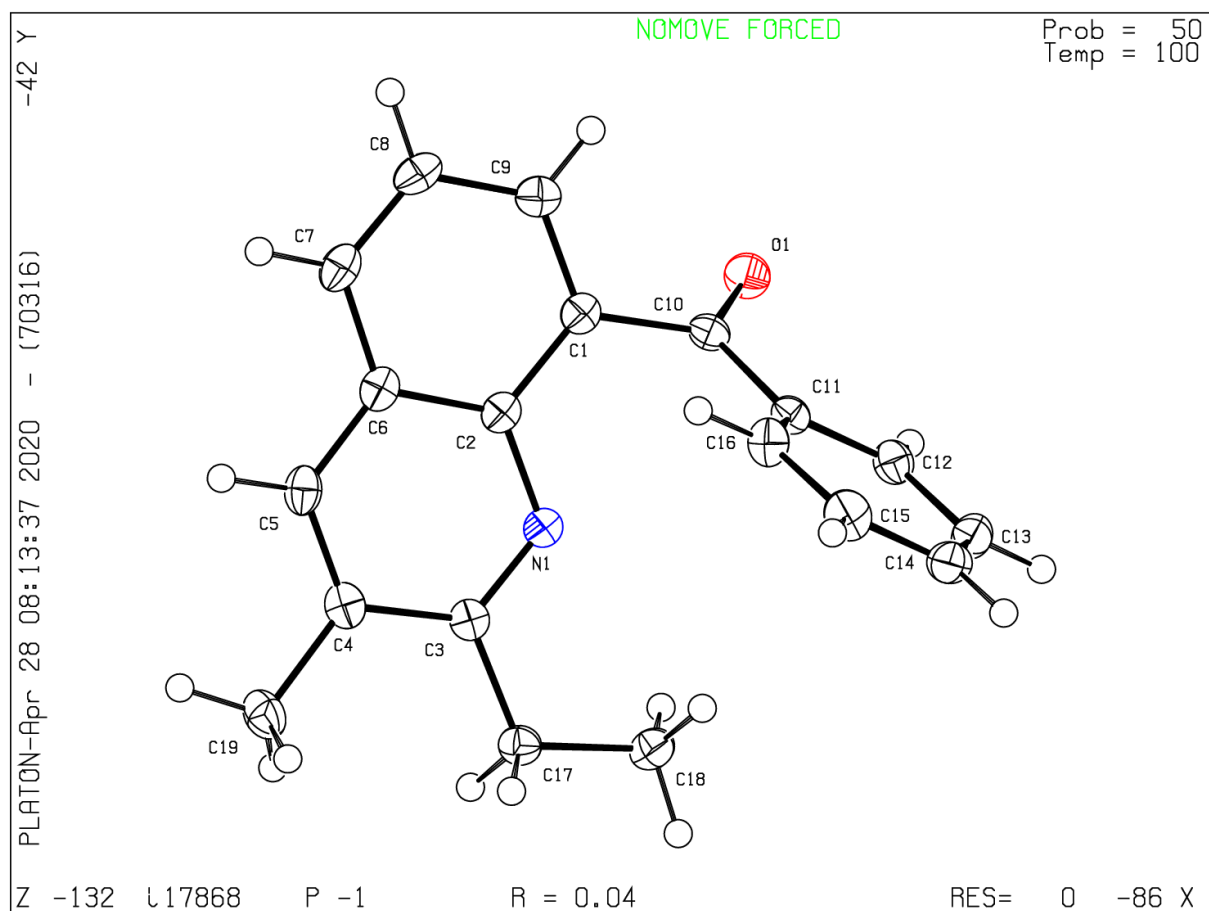

[Download CIF editor \(pubCIF\) from the IUCr](#)  
[Download CIF editor \(enCIFer\) from the CCDC](#)  
[Test a new CIF entry](#)



Crystal data and structure refinement for compound **5b**  
(the thermal ellipsoid was drawn at the 50% probability level)

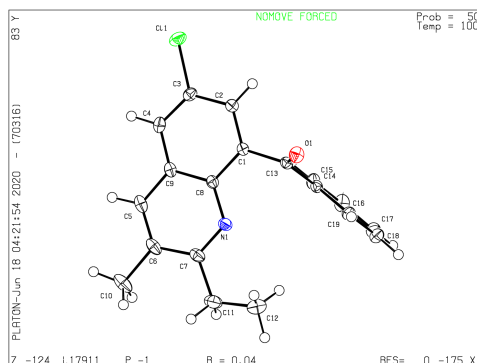

|                                   |                                             |                    |
|-----------------------------------|---------------------------------------------|--------------------|
| Identification code               | i17911                                      |                    |
| Empirical formula                 | C <sub>19</sub> H <sub>16</sub> ClN O       |                    |
| Formula weight                    | 309.78                                      |                    |
| Temperature                       | 100.0(2) K                                  |                    |
| Wavelength                        | 0.71073 Å                                   |                    |
| Crystal system                    | Triclinic                                   |                    |
| Space group                       | P -1                                        |                    |
| Unit cell dimensions              | a = 7.4420(3) Å                             | a = 103.4120(10)°. |
|                                   | b = 10.3406(3) Å                            | b = 100.533(2)°.   |
|                                   | c = 10.7949(4) Å                            | g = 90.7170(10)°.  |
| Volume                            | 793.14(5) Å <sup>3</sup>                    |                    |
| Z, Density (calculated)           | 2, 1.297 Mg/m <sup>3</sup>                  |                    |
| Absorption coefficient            | 0.242 mm <sup>-1</sup>                      |                    |
| F(000)                            | 324                                         |                    |
| Crystal size                      | 0.365 x 0.351 x 0.319 mm <sup>3</sup>       |                    |
| Theta range for data collection   | 2.028 to 33.138°.                           |                    |
| Index ranges                      | -11 ≤ h ≤ 11, -15 ≤ k ≤ 15, -16 ≤ l ≤ 16    |                    |
| Reflections collected             | 45950                                       |                    |
| Independent reflections           | 6054 [R(int) = 0.0386]                      |                    |
| Completeness to theta = 25.242°   | 100.0 %                                     |                    |
| Absorption correction             | Numerical                                   |                    |
| Max. and min. transmission        | 1 and 0.9445                                |                    |
| Refinement method                 | Full-matrix least-squares on F <sup>2</sup> |                    |
| Data / restraints / parameters    | 6054 / 0 / 201                              |                    |
| Goodness-of-fit on F <sup>2</sup> | 1.092                                       |                    |
| Final R indices [I > 2sigma(I)]   | R1 = 0.0383, wR2 = 0.1043                   |                    |
| R indices (all data)              | R1 = 0.0482, wR2 = 0.1123                   |                    |
| Extinction coefficient            | n/a                                         |                    |
| Largest diff. peak and hole       | 0.453 and -0.241 e.Å <sup>-3</sup>          |                    |

## checkCIF (basic structural check) running

Checking for embedded fcf data in CIF ...

Found embedded fcf data in CIF. Extracting fcf data from uploaded CIF, please wait ..

## checkCIF/PLATON (basic structural check)

Structure factors have been supplied for datablock(s) i17911

THIS REPORT IS FOR GUIDANCE ONLY. IF USED AS PART OF A REVIEW PROCEDURE FOR PUBLICATION, IT SHOULD NOT REPLACE THE EXPERTISE OF AN EXPERIENCED CRYSTALLOGRAPHIC REFEREE.

No syntax errors found.  
Please wait while processing ....

[CIF dictionary](#)  
[Interpreting this report](#)

[Structure factor report](#)

### Datablock: i17911

```

Bond precision:      C-C = 0.0014 A           Wavelength=0.71073
Cell:               a=7.4420(3)      b=10.3406(3)      c=10.7949(4)
                   alpha=103.412(1) beta=100.533(2)  gamma=90.717(1)
Temperature: 100 K

Volume              Calculated              Reported
                   793.14(5)                  793.14(5)
Space group         P -1                      P -1
Hall group          -P 1                      -P 1
Moiety formula      C19 H16 Cl N O            C19 H16 Cl N O
Sum formula         C19 H16 Cl N O            C19 H16 Cl N O
Mr                  309.78                    309.78
Dx,g cm-3           1.297                     1.297
Z                   2                         2
Mu (mm-1)           0.242                     0.242
F000                324.0                     324.0
F000'               324.41
h,k,lmax            11,15,16                   11,15,16
Nref                6054                      6054
Tmin,Tmax           0.915,0.926                0.945,1.000
Tmin'               0.915
Correction method= # Reported T Limits: Tmin=0.945
Tmax=1.000 AbsCorr = NUMERICAL
Data completeness= 1.000          Theta(max)= 33.138
R(reflections)= 0.0383( 5083)      wR2(reflections)= 0.1123( 6054)
S = 1.092                      Npar= 201
  
```

The following ALERTS were generated. Each ALERT has the format

**test-name ALERT alert-type alert-level.**

Click on the hyperlinks for more details of the test.

#### Alert level G

[PLAT883 ALERT 1 G](#) No Info/Value for \_atom\_sites\_solution\_primary . Please Do !  
[PLAT910 ALERT 3 G](#) Missing # of FCF Reflection(s) Below Theta(Min). 1 Note

|                         |                         |                   |                                                  |    |       |
|-------------------------|-------------------------|-------------------|--------------------------------------------------|----|-------|
| <a href="#">PLAT978</a> | <a href="#">ALERT 2</a> | <a href="#">G</a> | Number C-C Bonds with Positive Residual Density. | 16 | Info  |
| <a href="#">PLAT992</a> | <a href="#">ALERT 5</a> | <a href="#">G</a> | Repd & Actual _reflns_number_gt Values Differ by | 2  | Check |

---

0 **ALERT level A** = Most likely a serious problem - resolve or explain  
 0 **ALERT level B** = A potentially serious problem, consider carefully  
 0 **ALERT level C** = Check. Ensure it is not caused by an omission or oversight  
 4 **ALERT level G** = General information/check it is not something unexpected

1 ALERT type 1 CIF construction/syntax error, inconsistent or missing data  
 1 ALERT type 2 Indicator that the structure model may be wrong or deficient  
 1 ALERT type 3 Indicator that the structure quality may be low  
 0 ALERT type 4 Improvement, methodology, query or suggestion  
 1 ALERT type 5 Informative message, check

---

It is advisable to attempt to resolve as many as possible of the alerts in all categories. Often the minor alerts point to easily fixed oversights, errors and omissions in your CIF or refinement strategy, so attention to these fine details can be worthwhile. In order to resolve some of the more serious problems it may be necessary to carry out additional measurements or structure refinements. However, the purpose of your study may justify the reported deviations and the more serious of these should normally be commented upon in the discussion or experimental section of a paper or in the "special\_details" fields of the CIF. checkCIF was carefully designed to identify outliers and unusual parameters, but every test has its limitations and alerts that are not important in a particular case may appear. Conversely, the absence of alerts does not guarantee there are no aspects of the results needing attention. It is up to the individual to critically assess their own results and, if necessary, seek expert advice.

#### Publication of your CIF in IUCr journals

A basic structural check has been run on your CIF. These basic checks will be run on all CIFs submitted for publication in IUCr journals (*Acta Crystallographica*, *Journal of Applied Crystallography*, *Journal of Synchrotron Radiation*); however, if you intend to submit to *Acta Crystallographica Section C* or *E* or *IUCrData*, you should make sure that [full publication checks](#) are run on the final version of your CIF prior to submission.

#### Publication of your CIF in other journals

Please refer to the *Notes for Authors* of the relevant journal for any special instructions relating to CIF submission.

---

PLATON version of 04/06/2020; check.def file version of 02/06/2020

### Datablock i17911 - ellipsoid plot

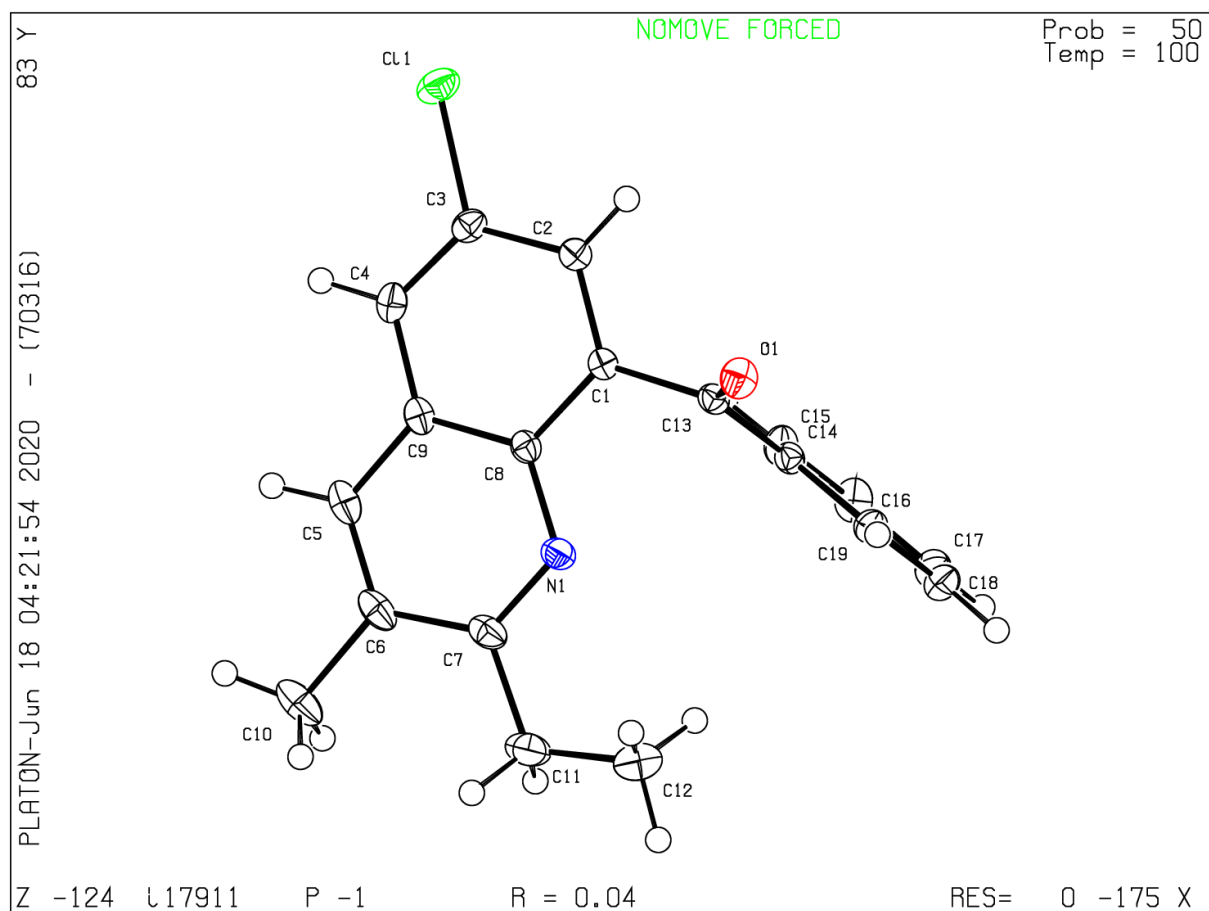

[Download CIF editor \(pubCIF\) from the IUCr](#)  
[Download CIF editor \(enCIFer\) from the CCDC](#)  
[Test a new CIF entry](#)

Crystal data and structure refinement for compound **5d**  
(the thermal ellipsoid was drawn at the 50% probability level)

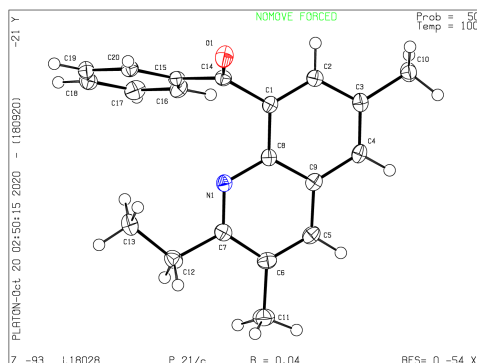

|                                   |                                             |                    |
|-----------------------------------|---------------------------------------------|--------------------|
| Identification code               | i18028                                      |                    |
| Empirical formula                 | C <sub>20</sub> H <sub>19</sub> N O         |                    |
| Formula weight                    | 289.36                                      |                    |
| Temperature                       | 100.0(2) K                                  |                    |
| Wavelength                        | 0.71073 Å                                   |                    |
| Crystal system                    | Monoclinic                                  |                    |
| Space group                       | P 2 <sub>1</sub> /c                         |                    |
| Unit cell dimensions              | a = 13.2934(5) Å                            | a = 90°.           |
|                                   | b = 14.2302(5) Å                            | b = 108.5200(10)°. |
|                                   | c = 8.6189(3) Å                             | g = 90°.           |
| Volume                            | 1545.98(10) Å <sup>3</sup>                  |                    |
| Z, Density (calculated)           | 4, 1.243 Mg/m <sup>3</sup>                  |                    |
| Absorption coefficient            | 0.076 mm <sup>-1</sup>                      |                    |
| F(000)                            | 616                                         |                    |
| Crystal size                      | 0.214 x 0.202 x 0.094 mm <sup>3</sup>       |                    |
| Theta range for data collection   | 2.158 to 27.098°.                           |                    |
| Index ranges                      | -17 ≤ h ≤ 17, -18 ≤ k ≤ 18, -11 ≤ l ≤ 10    |                    |
| Reflections collected             | 43540                                       |                    |
| Independent reflections           | 3392 [R(int) = 0.0506]                      |                    |
| Completeness to theta = 25.242°   | 99.7 %                                      |                    |
| Absorption correction             | Numerical                                   |                    |
| Max. and min. transmission        | 1 and 0.9466                                |                    |
| Refinement method                 | Full-matrix least-squares on F <sup>2</sup> |                    |
| Data / restraints / parameters    | 3392 / 0 / 202                              |                    |
| Goodness-of-fit on F <sup>2</sup> | 1.041                                       |                    |
| Final R indices [I > 2σ(I)]       | R1 = 0.0369, wR2 = 0.0885                   |                    |
| R indices (all data)              | R1 = 0.0479, wR2 = 0.0968                   |                    |
| Extinction coefficient            | n/a                                         |                    |
| Largest diff. peak and hole       | 0.238 and -0.177 e.Å <sup>-3</sup>          |                    |

## checkCIF (basic structural check) running

---

Checking for embedded fcf data in CIF ...

Found embedded fcf data in CIF. Extracting fcf data from uploaded CIF, please wait ...

## checkCIF/PLATON (basic structural check)

---

Structure factors have been supplied for datablock(s) i18028

THIS REPORT IS FOR GUIDANCE ONLY. IF USED AS PART OF A REVIEW PROCEDURE FOR PUBLICATION, IT SHOULD NOT REPLACE THE EXPERTISE OF AN EXPERIENCED CRYSTALLOGRAPHIC REFEREE.

No syntax errors found.  
Please wait while processing ....

[CIF dictionary](#)  
[Interpreting this report](#)

[Structure factor report](#)

### Datablock: i18028

---

|                 |                                             |                    |
|-----------------|---------------------------------------------|--------------------|
| Bond precision: | C-C = 0.0017 Å                              | Wavelength=0.71073 |
| Cell:           | a=13.2934(5)    b=14.2302(5)    c=8.6189(3) |                    |
|                 | alpha=90    beta=108.520(1)    gamma=90     |                    |
| Temperature:    | 100 K                                       |                    |

  

|                        | Calculated   | Reported     |
|------------------------|--------------|--------------|
| Volume                 | 1545.98(10)  | 1545.98(10)  |
| Space group            | P 21/c       | P 21/c       |
| Hall group             | -P 2ybc      | -P 2ybc      |
| Moiety formula         | C20 H19 N O  | C20 H19 N O  |
| Sum formula            | C20 H19 N O  | C20 H19 N O  |
| Mr                     | 289.36       | 289.36       |
| Dx, g cm <sup>-3</sup> | 1.243        | 1.243        |
| Z                      | 4            | 4            |
| Mu (mm <sup>-1</sup> ) | 0.076        | 0.076        |
| F000                   | 616.0        | 616.0        |
| F000'                  | 616.24       |              |
| h, k, lmax             | 17, 18, 11   | 17, 18, 11   |
| Nref                   | 3400         | 3392         |
| Tmin, Tmax             | 0.984, 0.993 | 0.947, 1.000 |
| Tmin'                  | 0.984        |              |

Correction method= # Reported T Limits: Tmin=0.947  
Tmax=1.000 AbsCorr = NUMERICAL

Data completeness= 0.998    Theta(max)= 27.098

R(reflections)= 0.0369( 2813)    wR2(reflections)= 0.0968( 3392)

S = 1.041    Npar= 202

---

The following ALERTS were generated. Each ALERT has the format

**test-name ALERT alert-type alert-level.**

Click on the hyperlinks for more details of the test.

#### ● Alert level C

|                         |                       |                   |                   |                                                  |       |   |        |
|-------------------------|-----------------------|-------------------|-------------------|--------------------------------------------------|-------|---|--------|
| <a href="#">PLAT911</a> | <a href="#">ALERT</a> | <a href="#">3</a> | <a href="#">C</a> | Missing FCF Refl Between Thmin & STh/L=          | 0.600 | 7 | Report |
| <a href="#">PLAT913</a> | <a href="#">ALERT</a> | <a href="#">3</a> | <a href="#">C</a> | Missing # of Very Strong Reflections in FCF .... |       | 5 | Note   |

#### ● Alert level G

|                         |                       |                   |                   |                                                  |  |        |      |
|-------------------------|-----------------------|-------------------|-------------------|--------------------------------------------------|--|--------|------|
| <a href="#">PLAT883</a> | <a href="#">ALERT</a> | <a href="#">1</a> | <a href="#">G</a> | No Info/Value for _atom_sites_solution_primary . |  | Please | Do ! |
| <a href="#">PLAT910</a> | <a href="#">ALERT</a> | <a href="#">3</a> | <a href="#">G</a> | Missing # of FCF Reflection(s) Below Theta(Min). |  | 1      | Note |
| <a href="#">PLAT978</a> | <a href="#">ALERT</a> | <a href="#">2</a> | <a href="#">G</a> | Number C-C Bonds with Positive Residual Density. |  | 16     | Info |

0 **ALERT level A** = Most likely a serious problem - resolve or explain  
 0 **ALERT level B** = A potentially serious problem, consider carefully  
 2 **ALERT level C** = Check. Ensure it is not caused by an omission or oversight  
 3 **ALERT level G** = General information/check it is not something unexpected

1 ALERT type 1 CIF construction/syntax error, inconsistent or missing data  
 1 ALERT type 2 Indicator that the structure model may be wrong or deficient  
 3 ALERT type 3 Indicator that the structure quality may be low  
 0 ALERT type 4 Improvement, methodology, query or suggestion  
 0 ALERT type 5 Informative message, check

It is advisable to attempt to resolve as many as possible of the alerts in all categories. Often the minor alerts point to easily fixed oversights, errors and omissions in your CIF or refinement strategy, so attention to these fine details can be worthwhile. In order to resolve some of the more serious problems it may be necessary to carry out additional measurements or structure refinements. However, the purpose of your study may justify the reported deviations and the more serious of these should normally be commented upon in the discussion or experimental section of a paper or in the "special\_details" fields of the CIF. checkCIF was carefully designed to identify outliers and unusual parameters, but every test has its limitations and alerts that are not important in a particular case may appear. Conversely, the absence of alerts does not guarantee there are no aspects of the results needing attention. It is up to the individual to critically assess their own results and, if necessary, seek expert advice.

#### Publication of your CIF in IUCr journals

A basic structural check has been run on your CIF. These basic checks will be run on all CIFs submitted for publication in IUCr journals (*Acta Crystallographica*, *Journal of Applied Crystallography*, *Journal of Synchrotron Radiation*); however, if you intend to submit to *Acta Crystallographica Section C* or *E* or *IUCrData*, you should make sure that [full publication checks](#) are run on the final version of your CIF prior to submission.

#### Publication of your CIF in other journals

Please refer to the *Notes for Authors* of the relevant journal for any special instructions relating to CIF submission.

PLATON version of 18/09/2020; check.def file version of 20/08/2020

#### Datablock i18028 - ellipsoid plot



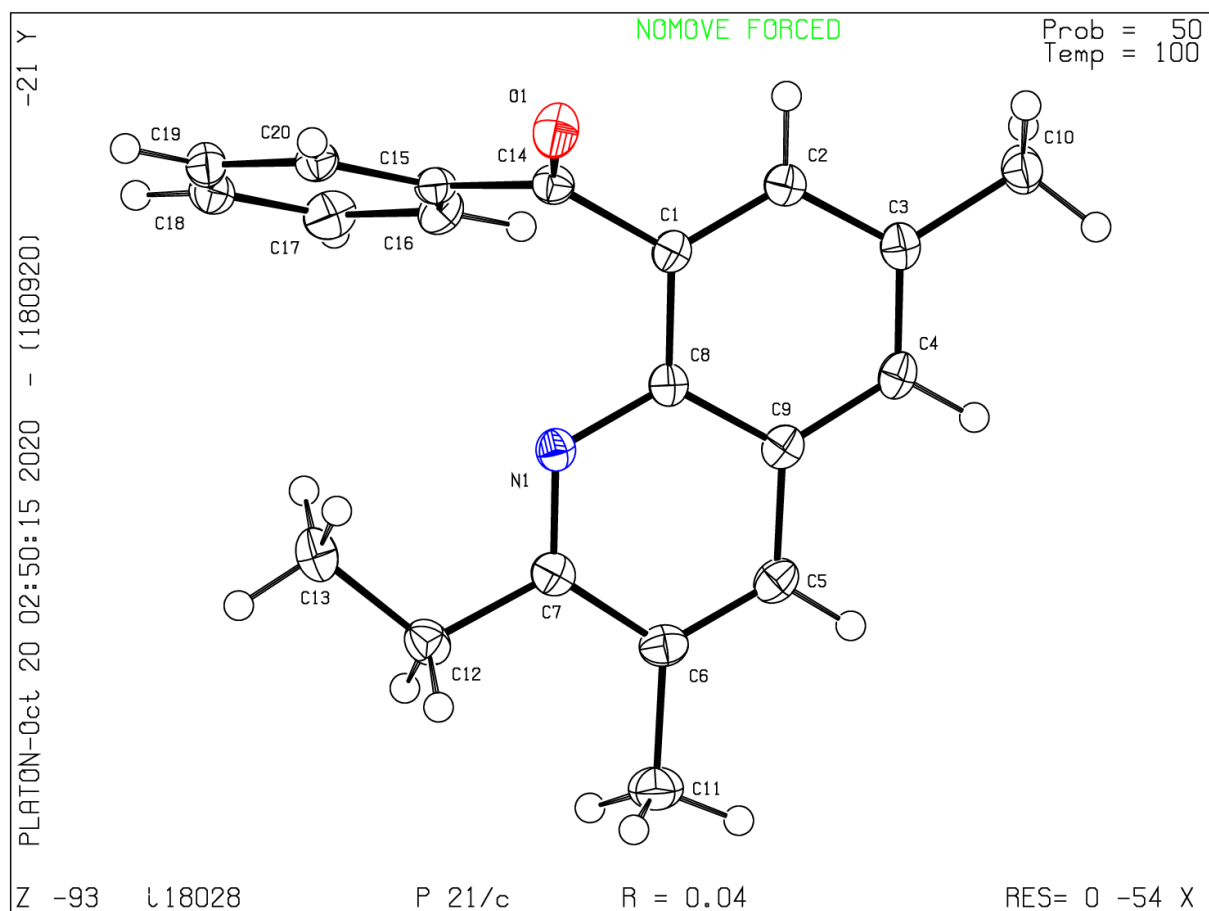

[Download CIF editor \(pubCIF\) from the IUCr](#)  
[Download CIF editor \(enCIFer\) from the CCDC](#)  
[Test a new CIF entry](#)

# Compound 3a

1H CYL-080 (2) sep6-7 0527

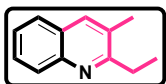

Compound **3a**

<sup>1</sup>H NMR (500 MHz, CDCl<sub>3</sub>) spectra

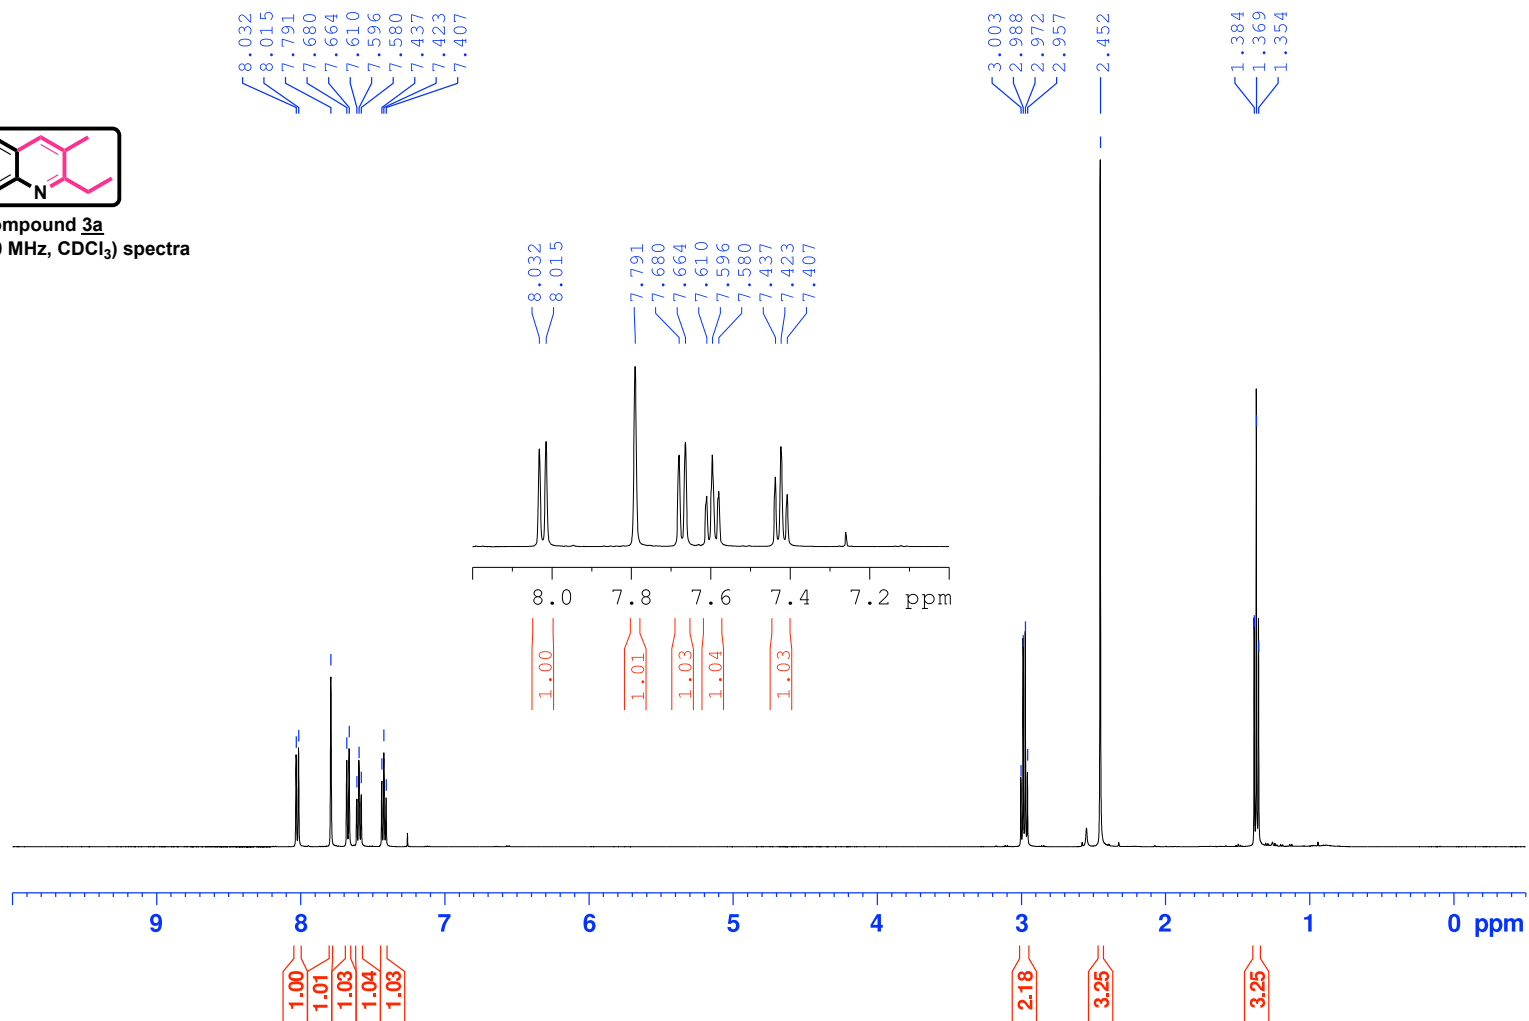

## Compound 3a

<sup>13</sup>C CYL-080 (2) sep6-7 0527

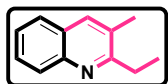

Compound **3a**

<sup>13</sup>C NMR (125 MHz, CDCl<sub>3</sub>) spectra

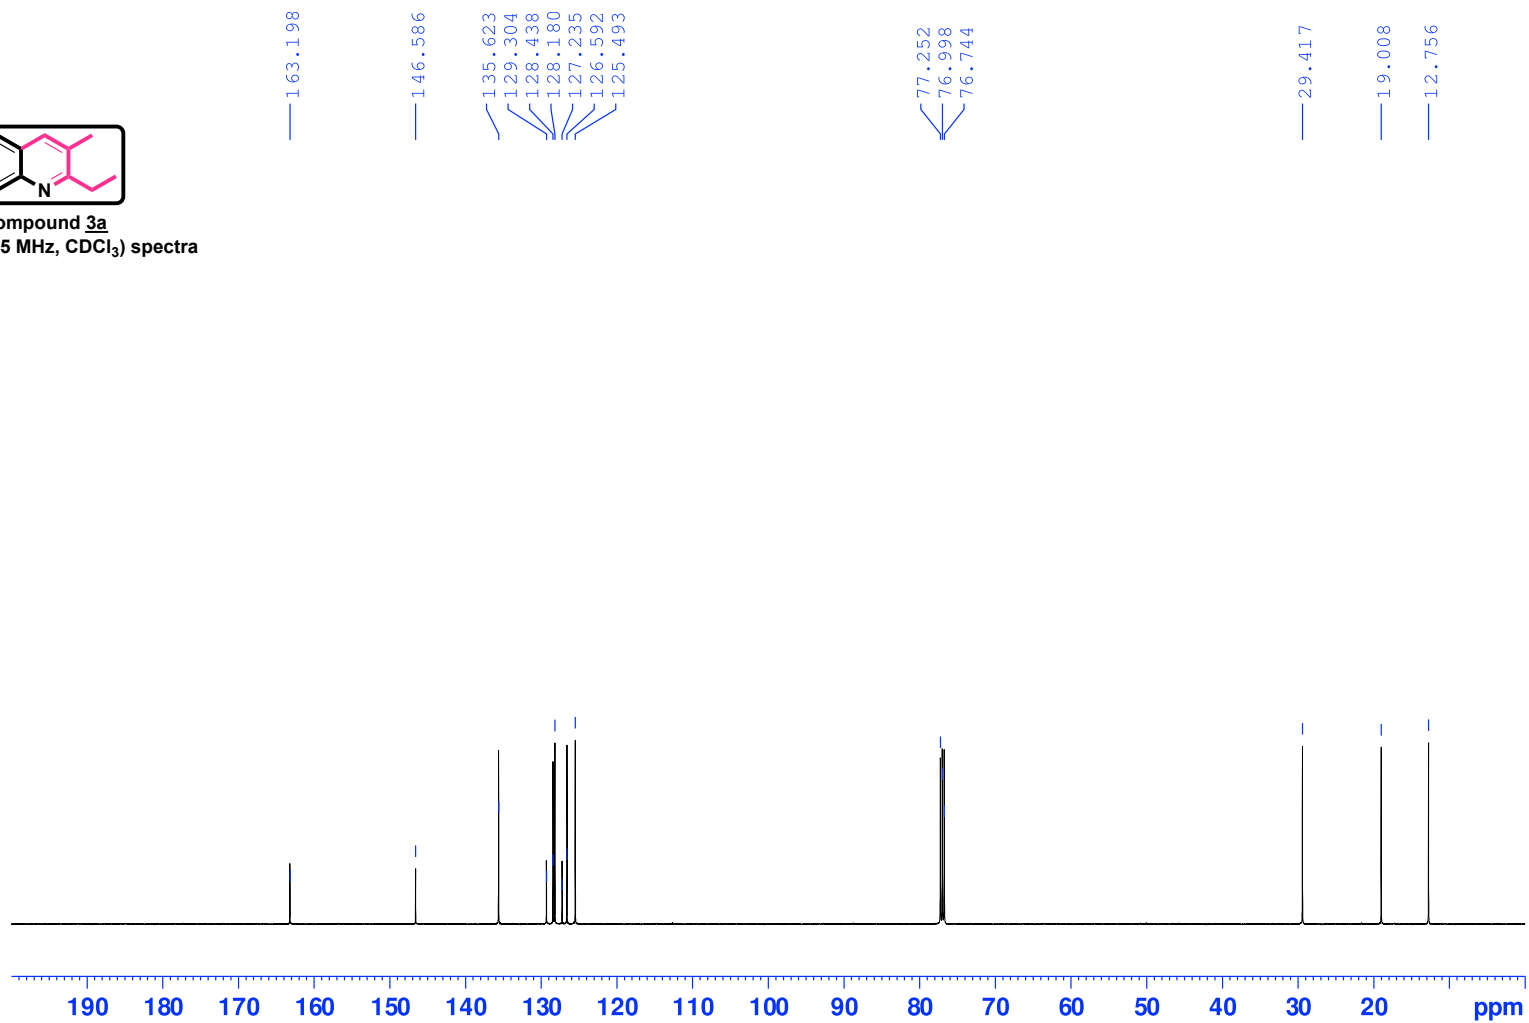

## Compound 3b

1H CKC-702 sep16-17 0827

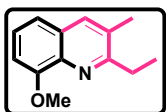

Compound 3b  
<sup>1</sup>H NMR (500 MHz, CDCl<sub>3</sub>) spectra

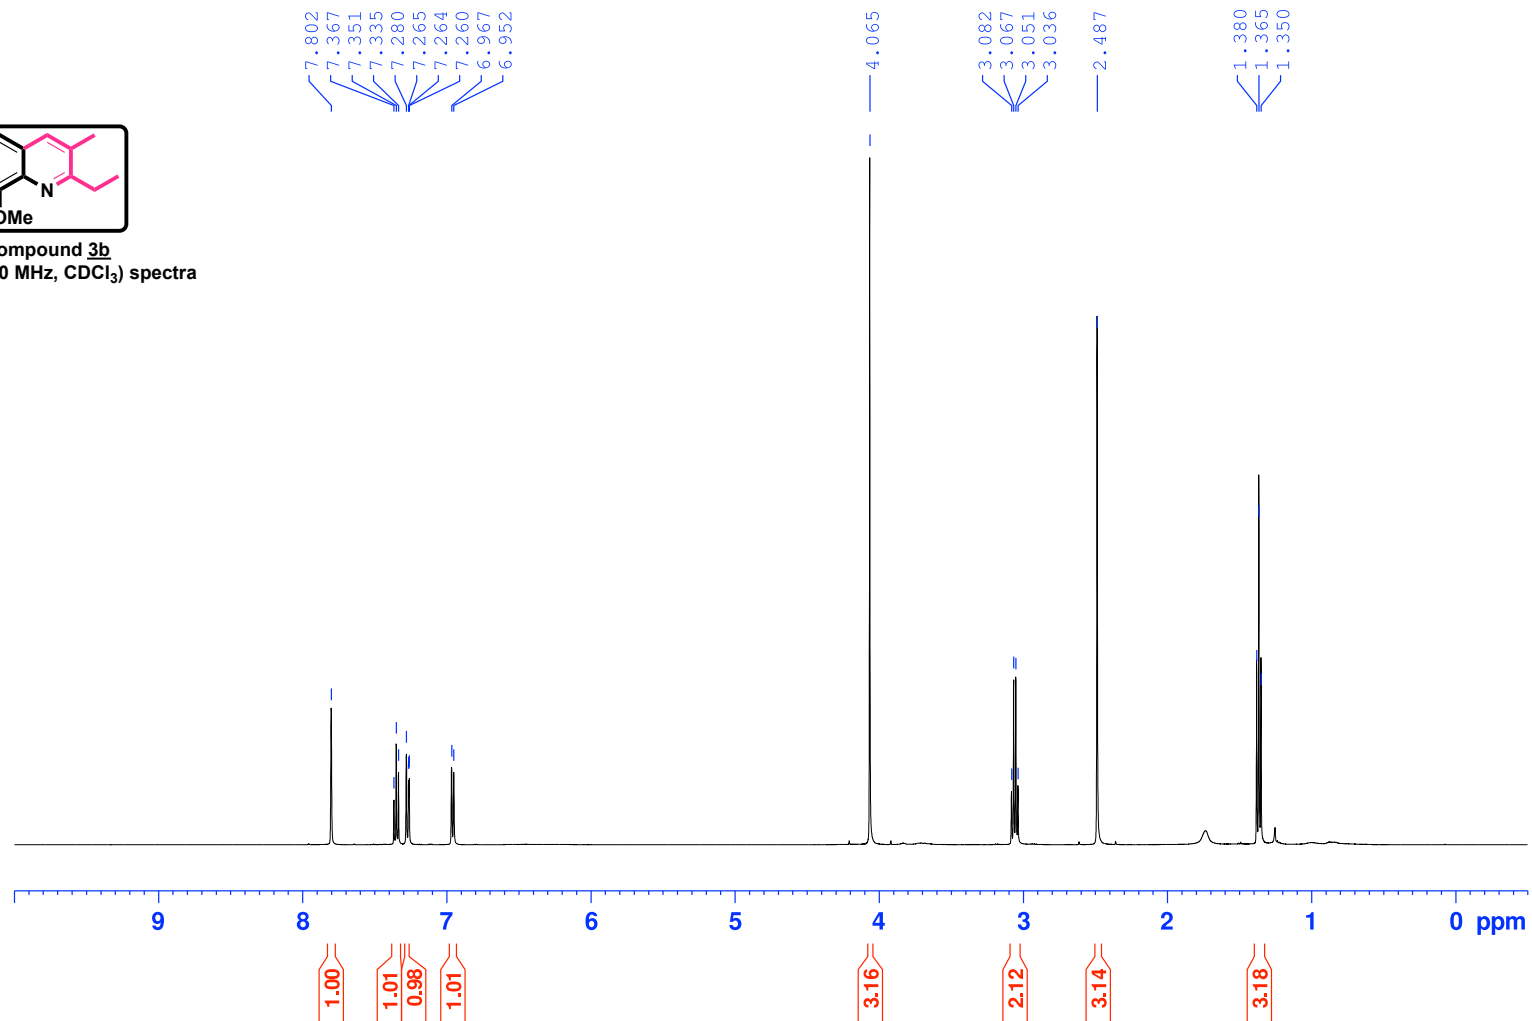

## Compound 3b

13C CKC-702 sep16-17 0827

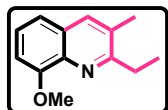

Compound 3b

<sup>13</sup>C NMR (125 MHz, CDCl<sub>3</sub>) spectra

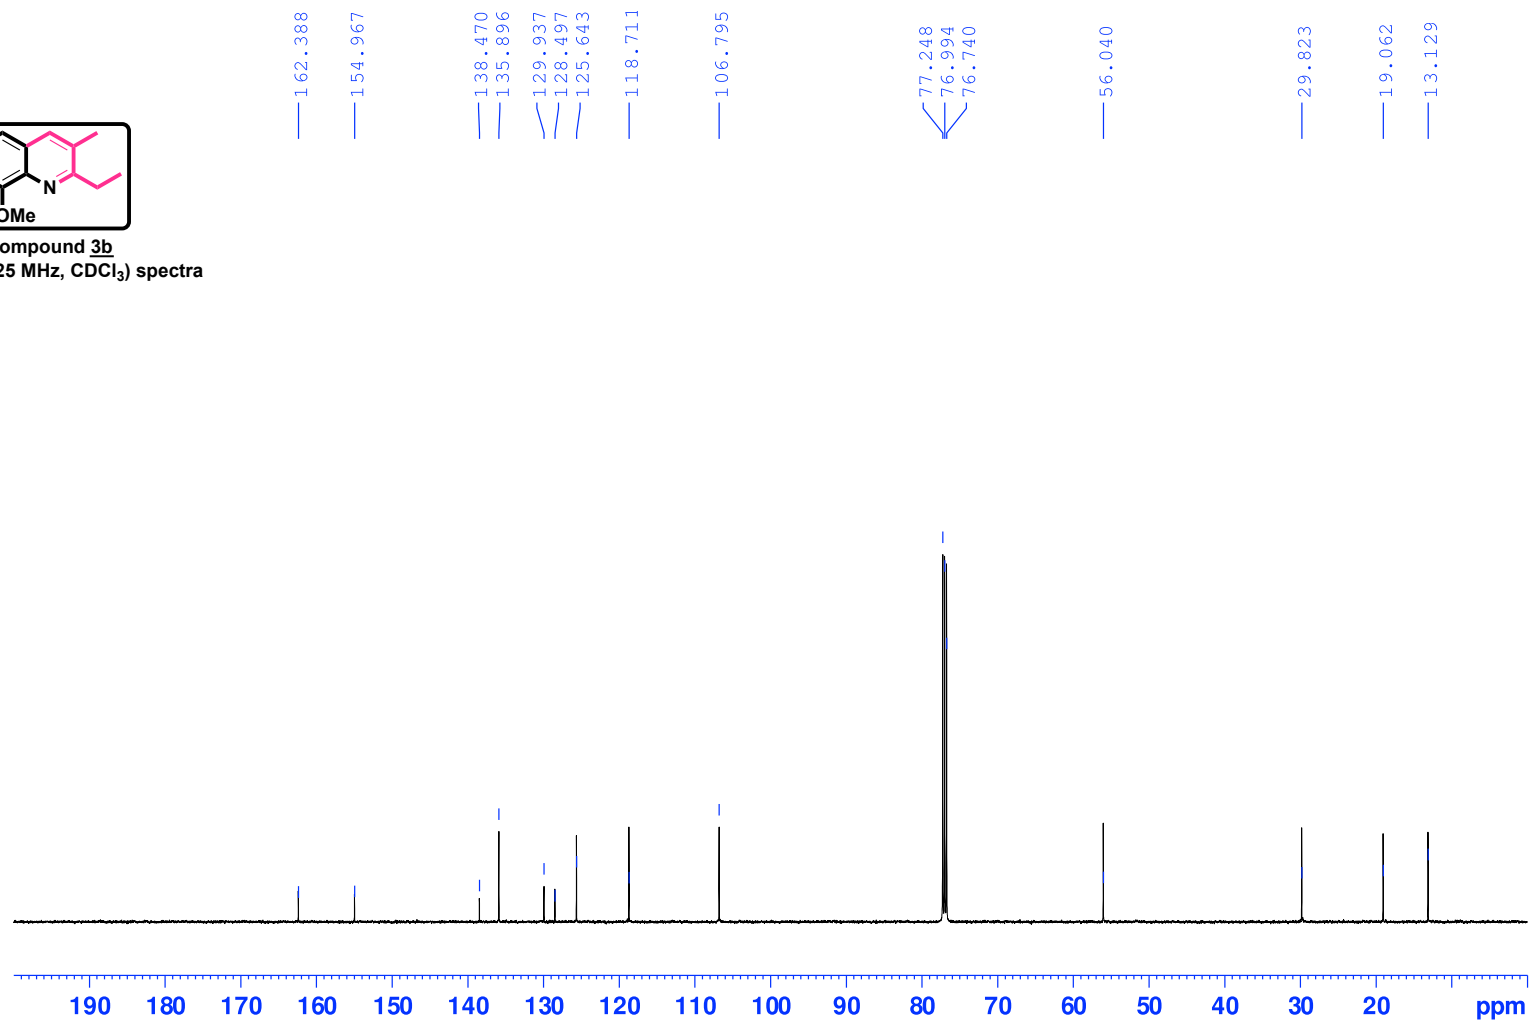

## Compound 3c

<sup>1</sup>H CKC-701 sep16-17 0824

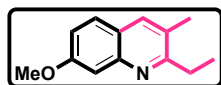

Compound **3c**

<sup>1</sup>H NMR (500 MHz, CDCl<sub>3</sub>) spectra

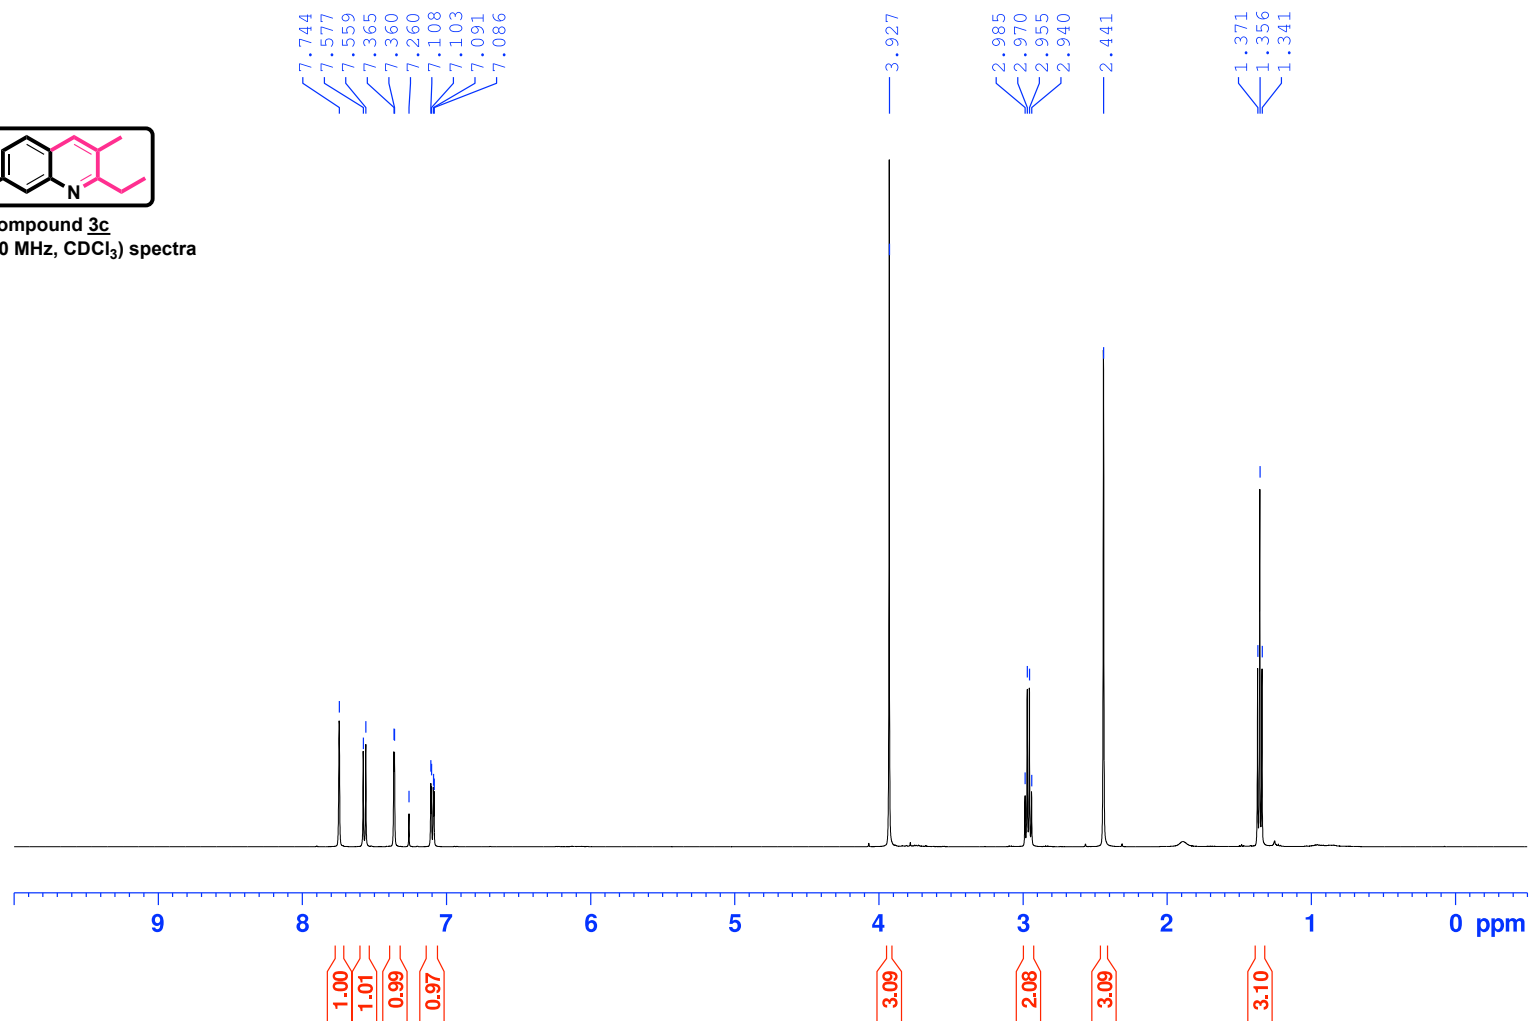

## Compound 3c

13C CKC-701 sep16-17 0824

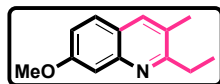

Compound **3c**

<sup>13</sup>C NMR (125 MHz, CDCl<sub>3</sub>) spectra

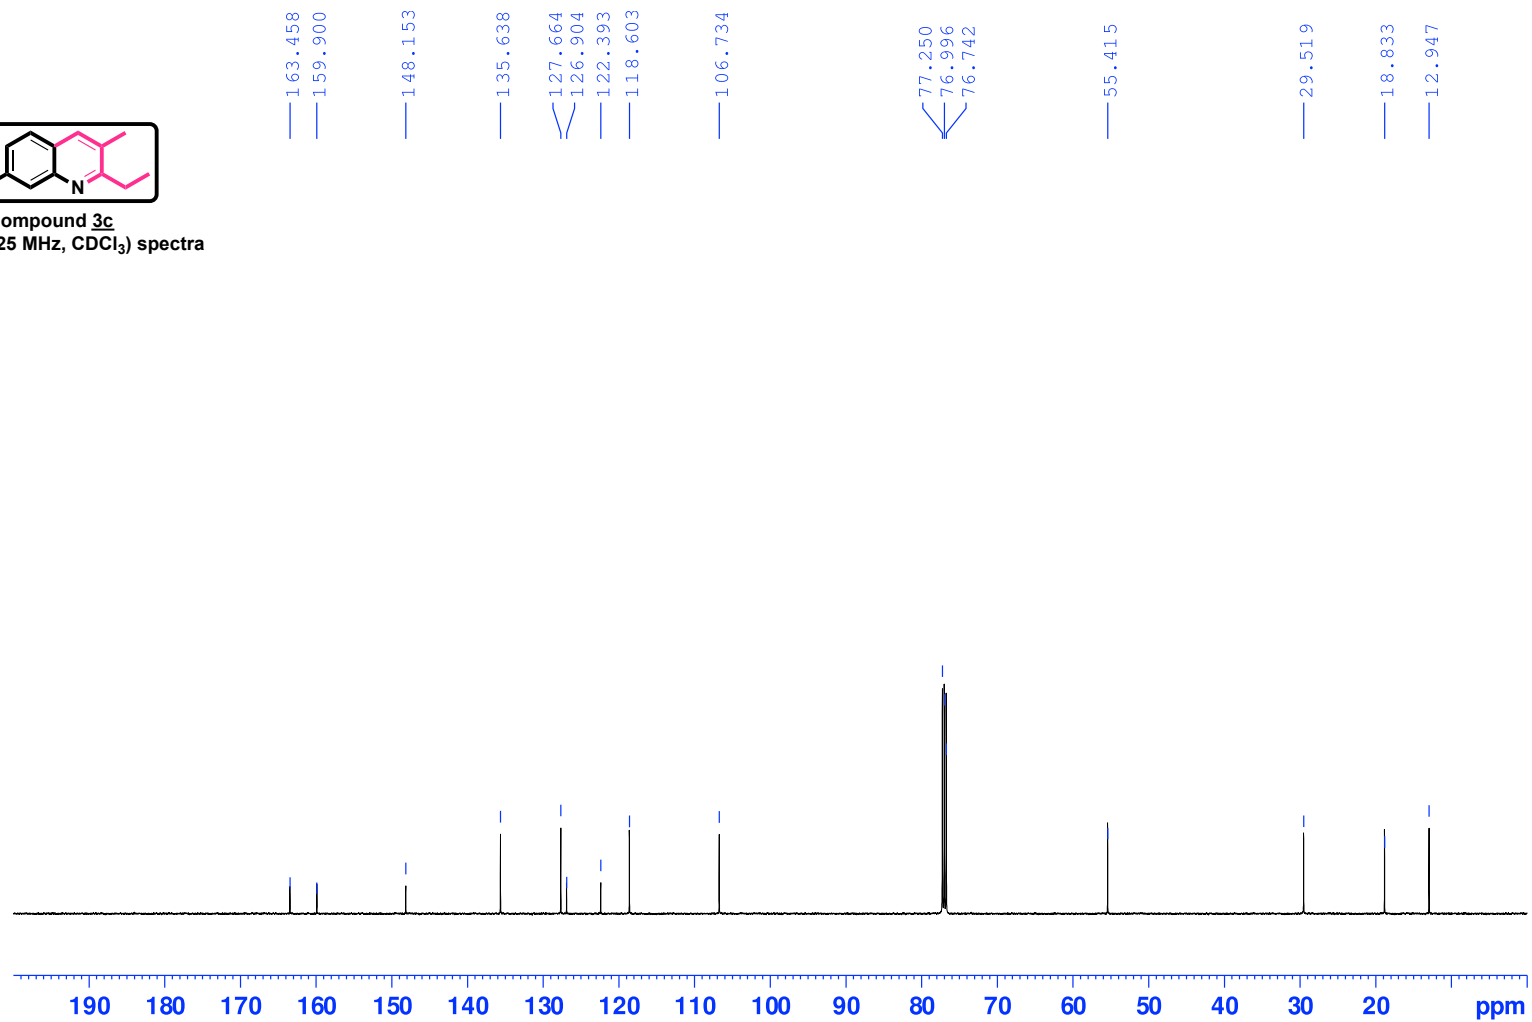



## Compound 3d

<sup>1</sup>H CKC-500 sep44-45 0617

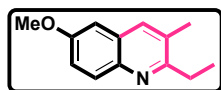

Compound 3d

<sup>1</sup>H NMR (500 MHz, CDCl<sub>3</sub>) spectra

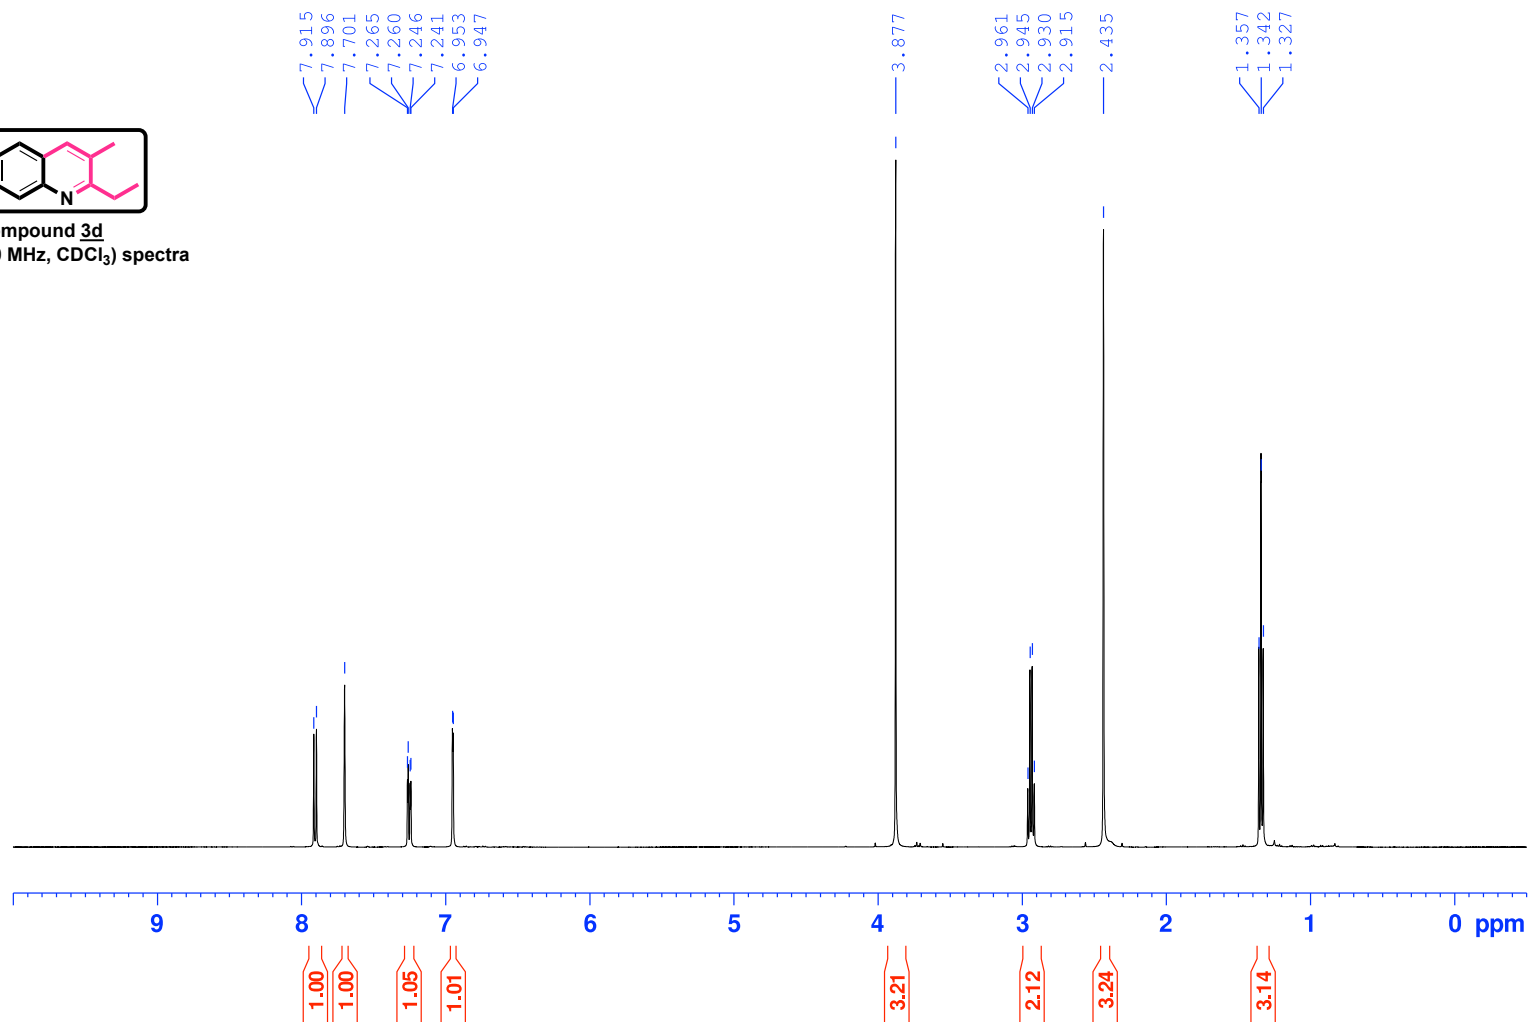

## Compound 3d

<sup>13</sup>C CKC-500 sep44-45 0617

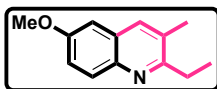

Compound **3d**

<sup>13</sup>C NMR (125 MHz, CDCl<sub>3</sub>) spectra

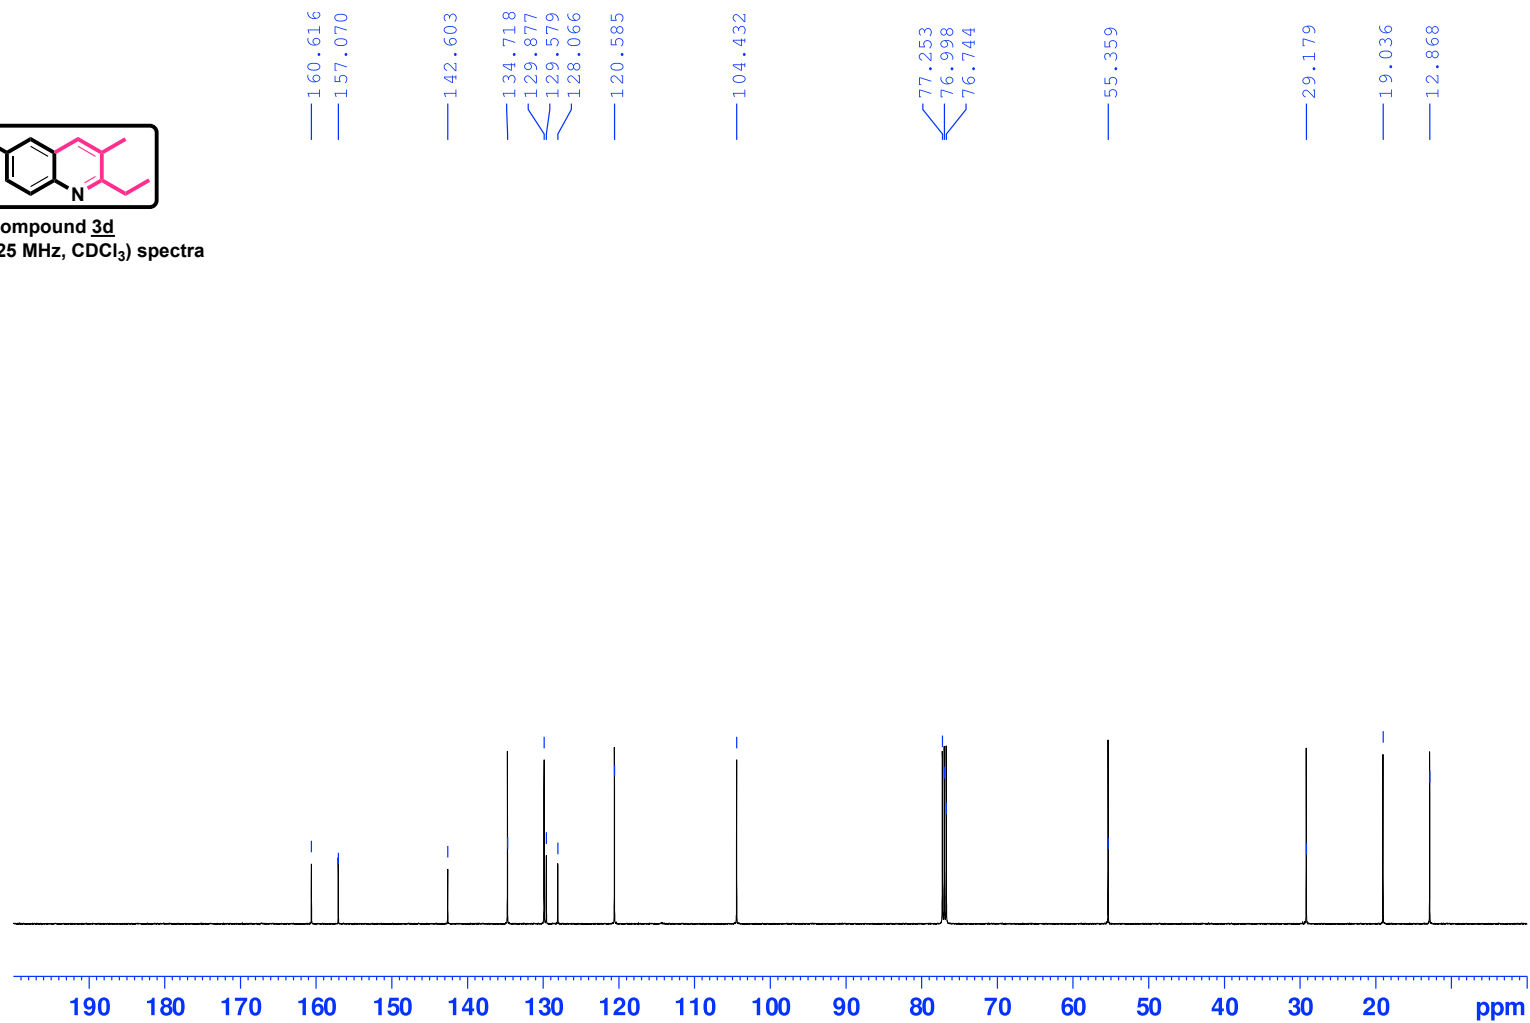

# Compound 3e

1H CKC-703 sep19-20 0901

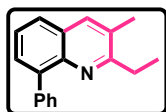

Compound 3e  
<sup>1</sup>H NMR (500 MHz, CDCl<sub>3</sub>) spectra

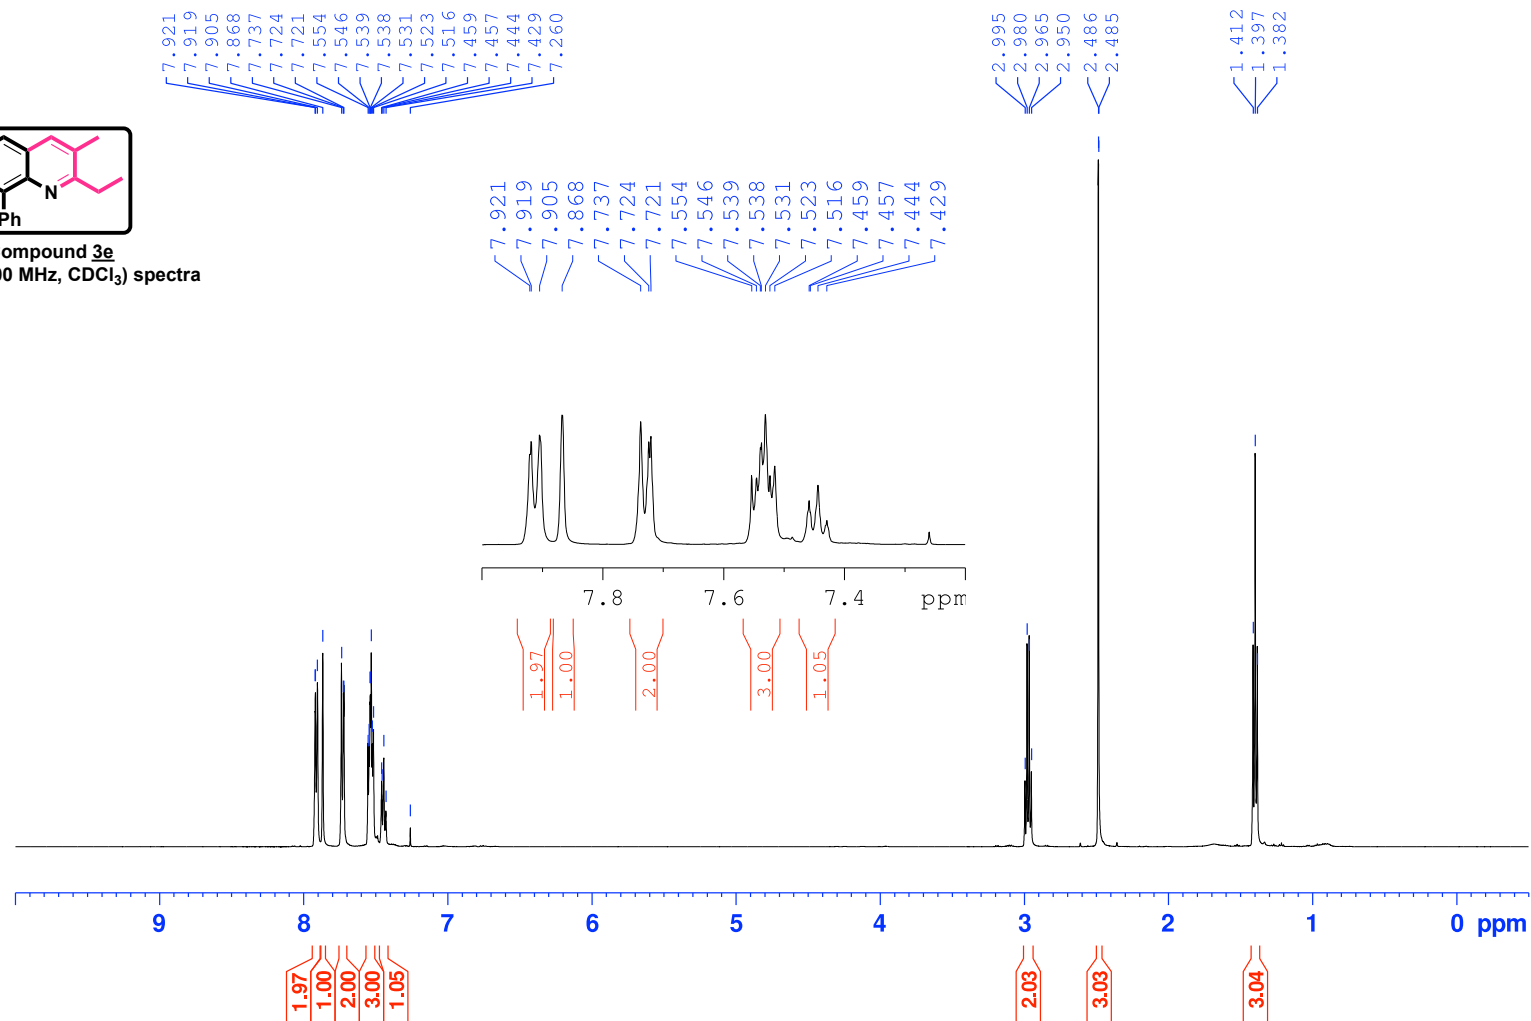

# Compound 3e

13C CKC-703 sep19-20 0901

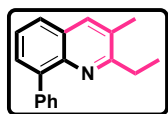

Compound 3e  
<sup>13</sup>C NMR (125 MHz, CDCl<sub>3</sub>) spectra

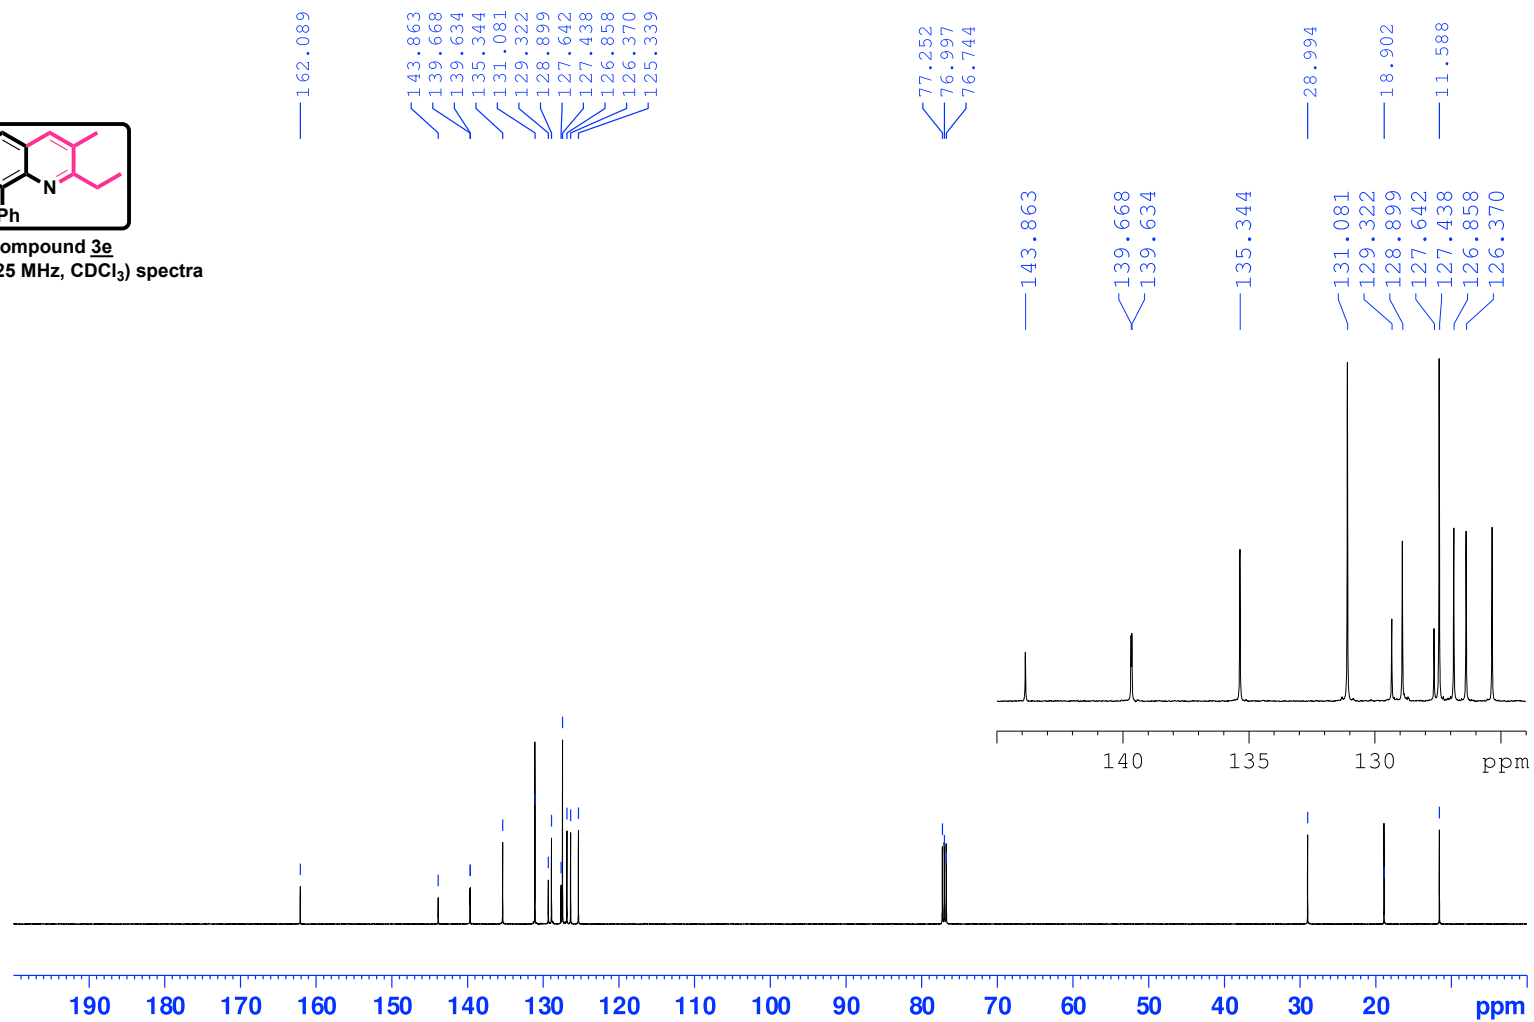

# Compound 3f

1H CKC-704 sep32-33 0901

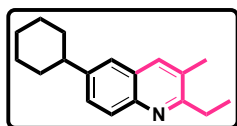

Compound **3f**  
<sup>1</sup>H NMR (500 MHz, CDCl<sub>3</sub>) spectra

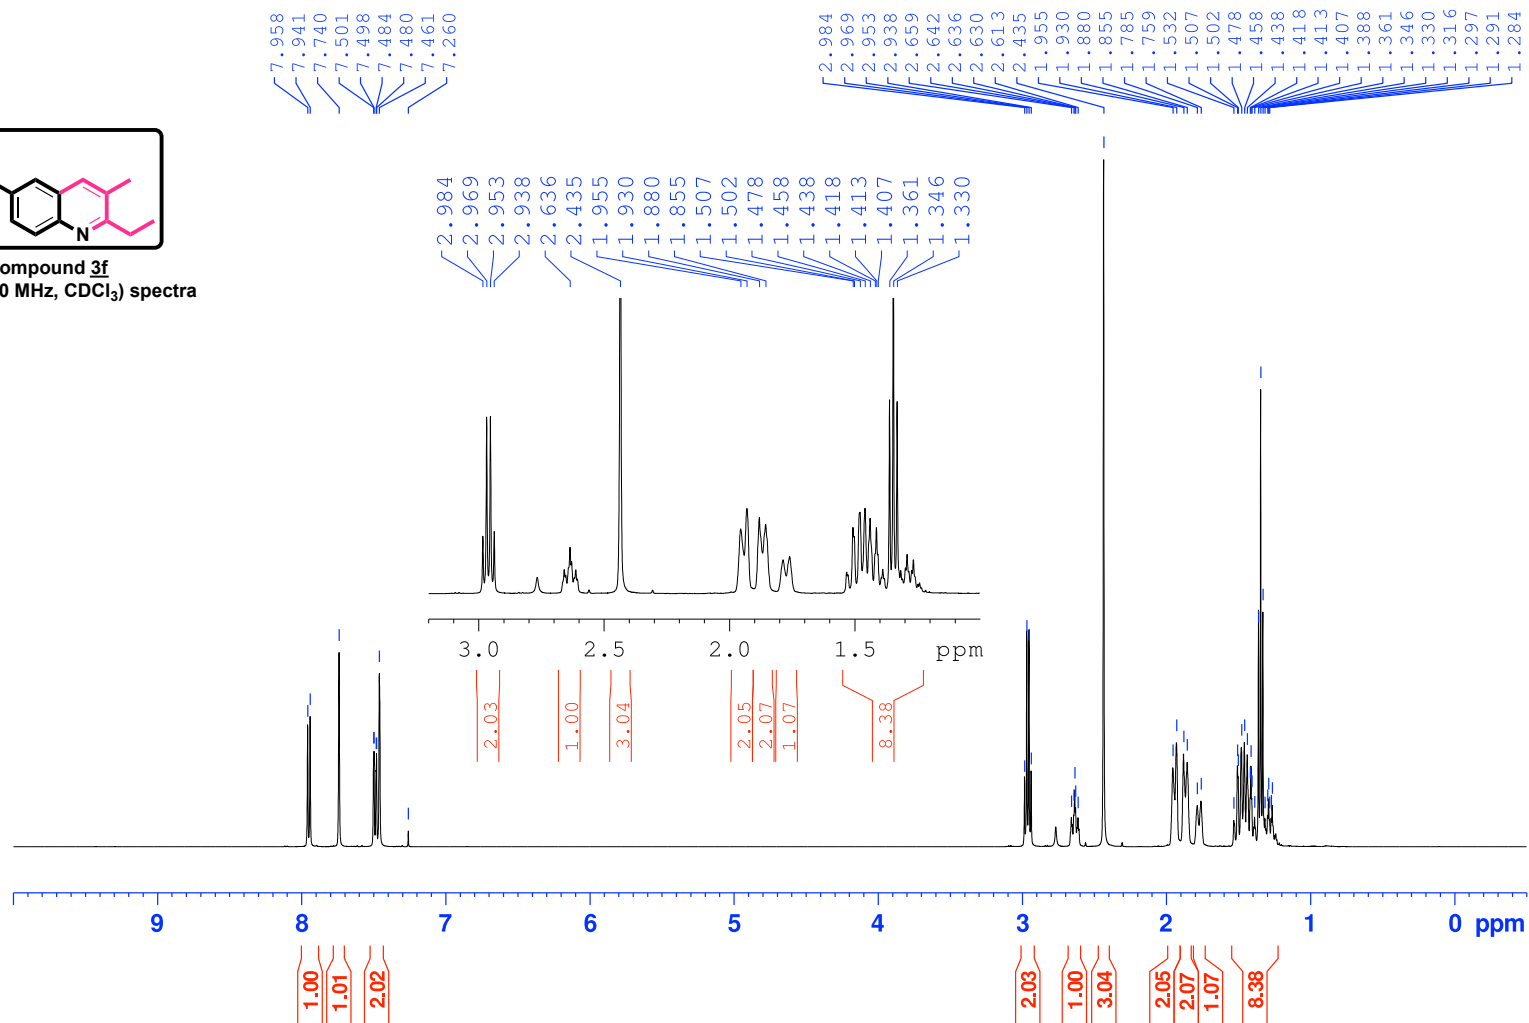

# Compound 3f

13C CKC-704 sep32-33 0901

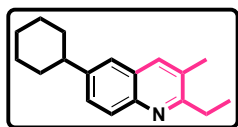

Compound 3f  
<sup>13</sup>C NMR (125 MHz, CDCl<sub>3</sub>) spectra

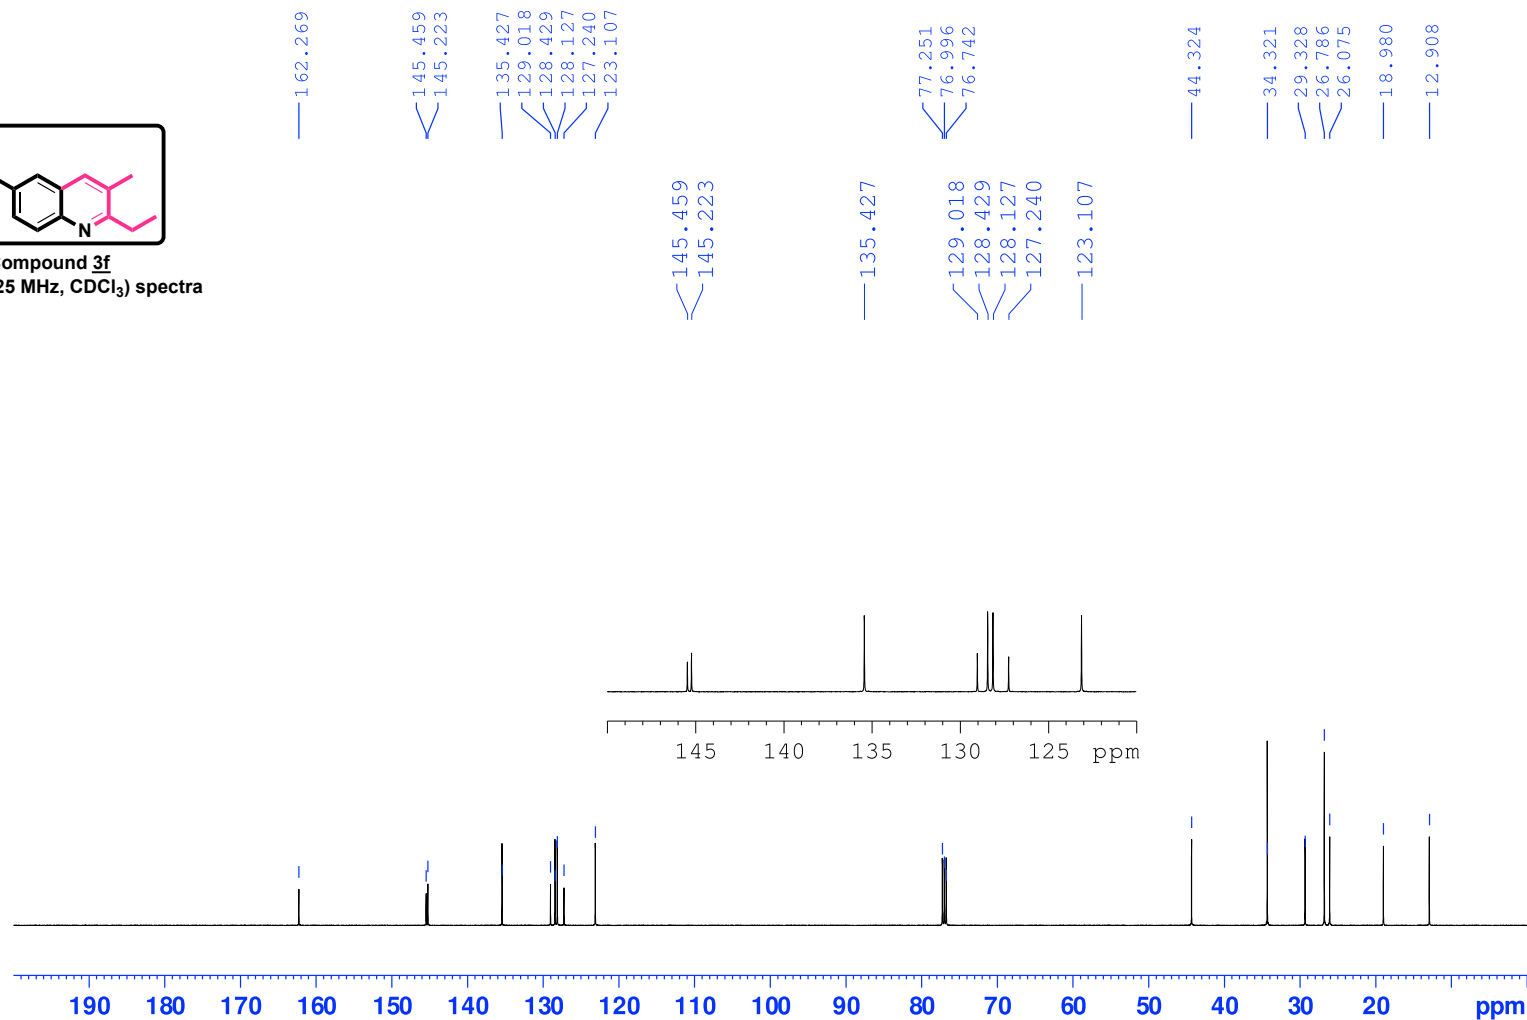

# Compound 3g

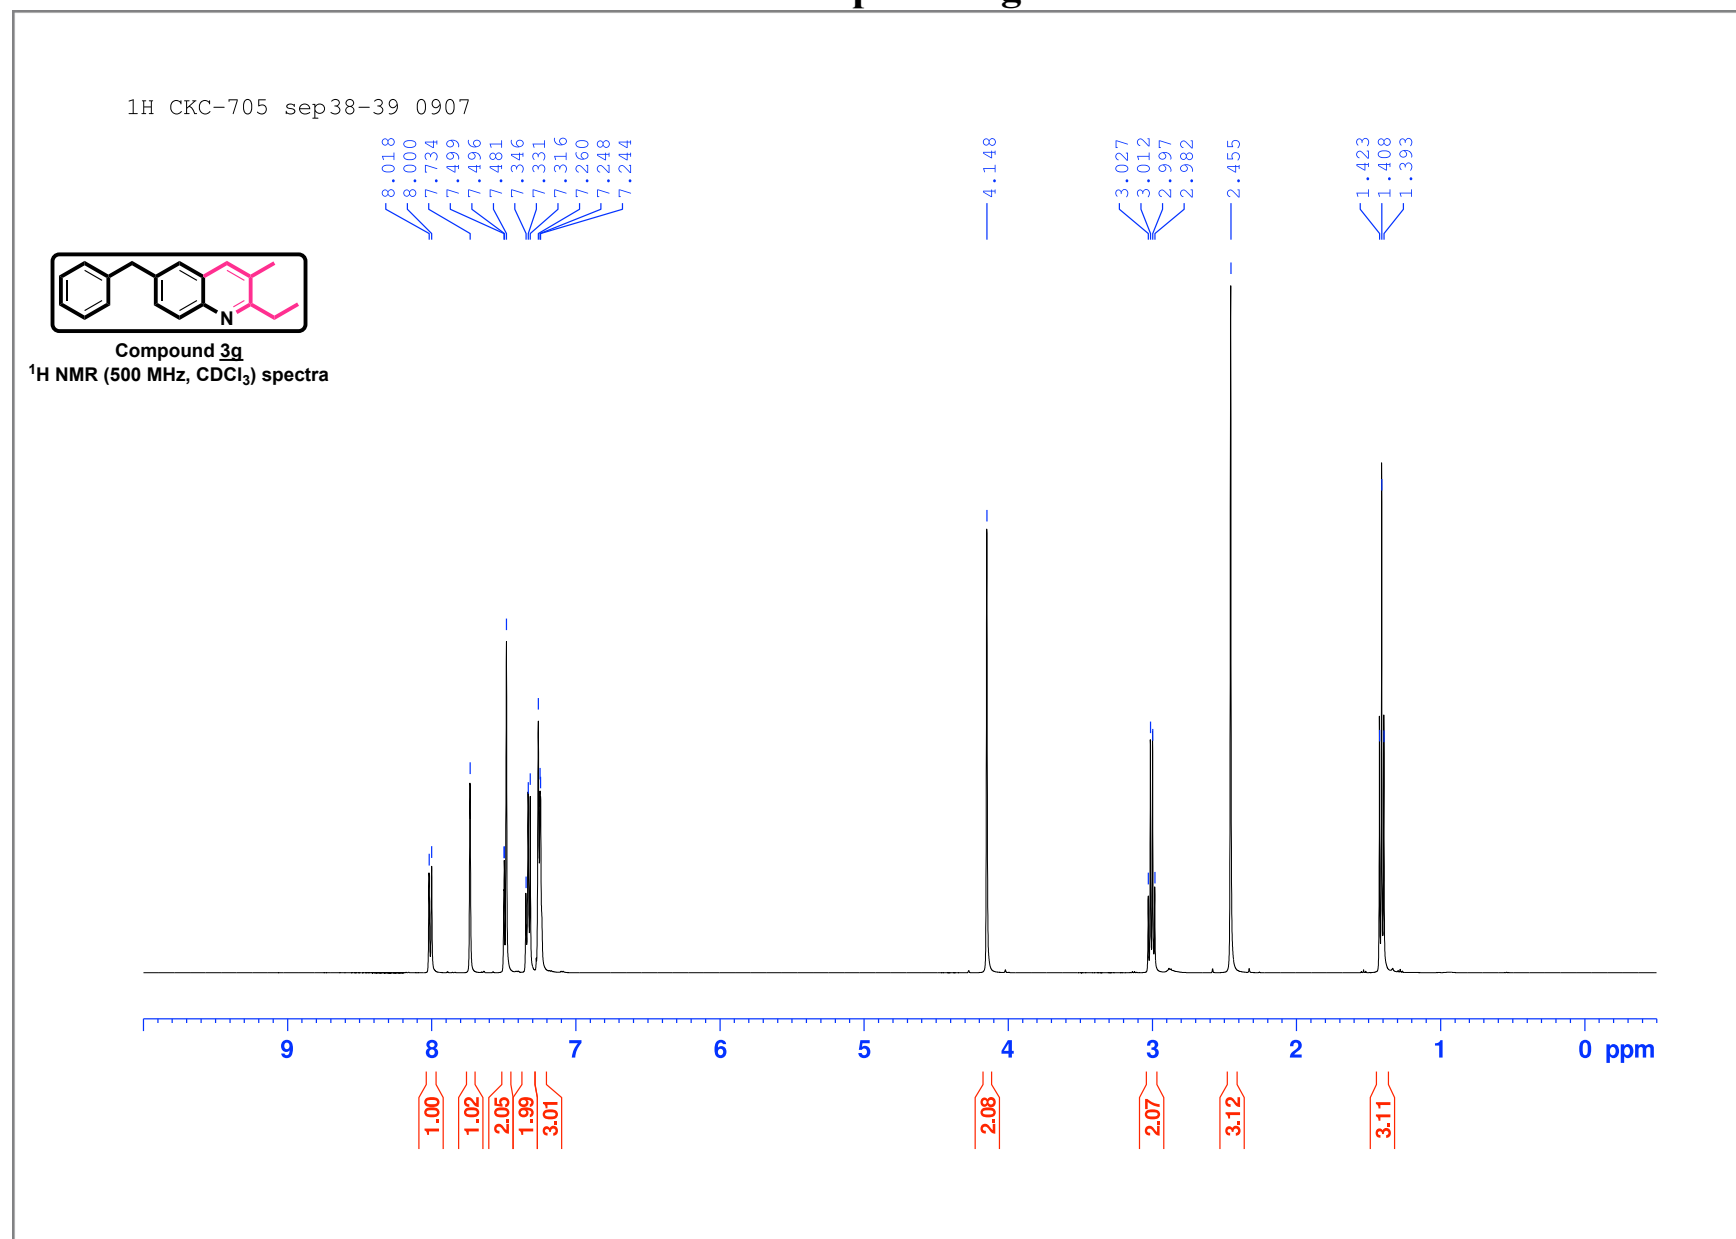



# Compound 3g

13C CKC-705 sep38-39 0907

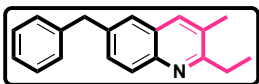

Compound **3g**  
<sup>13</sup>C NMR (125 MHz, CDCl<sub>3</sub>) spectra

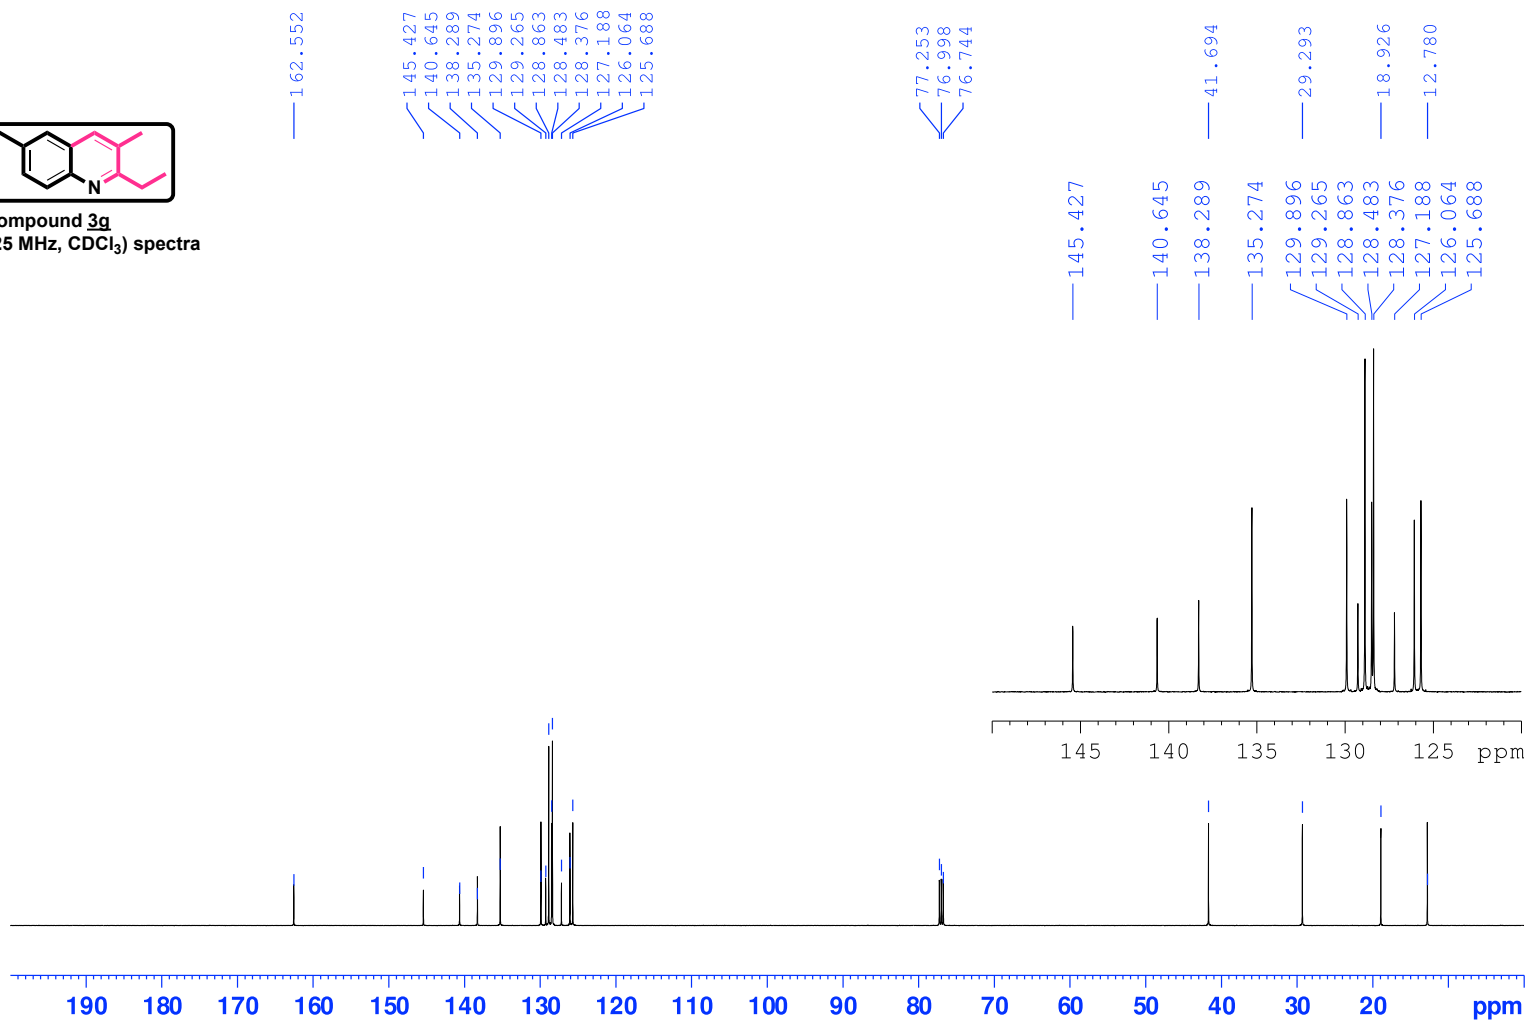

# Compound 3h

1H CKC-706 sep26-27 0909

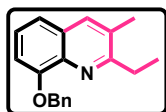

Compound 3h  
<sup>1</sup>H NMR (500 MHz, CDCl<sub>3</sub>) spectra

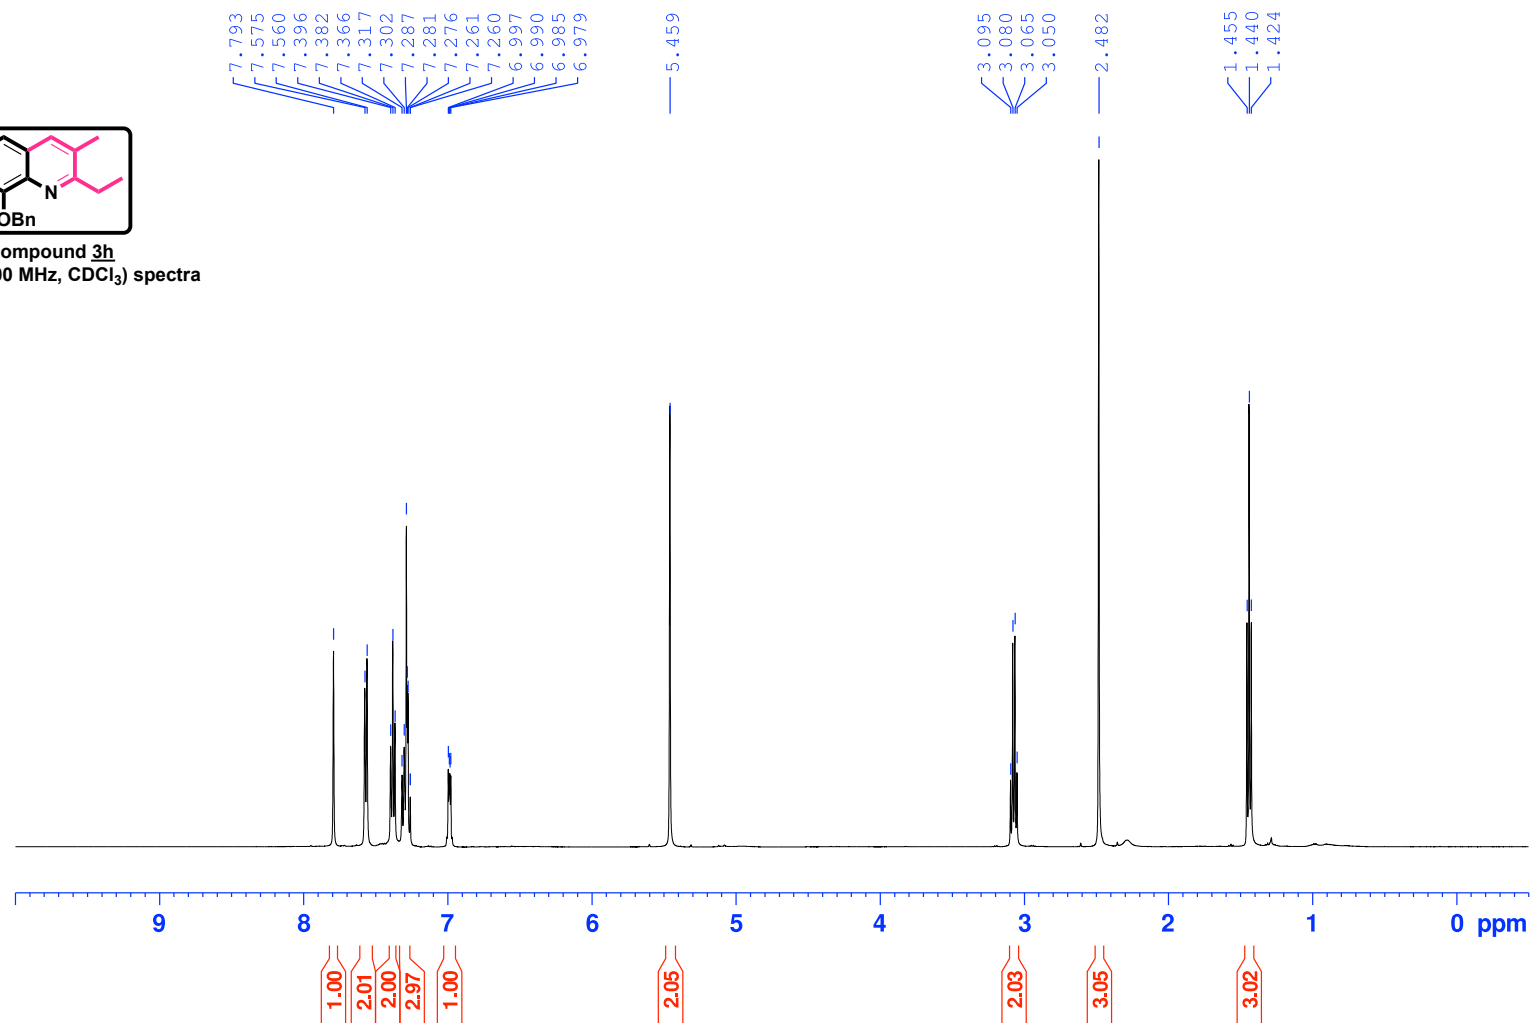

# Compound 3h

13C CKC-706 sep26-27 0909

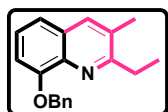

Compound 3h

<sup>13</sup>C NMR (125 MHz, CDCl<sub>3</sub>) spectra

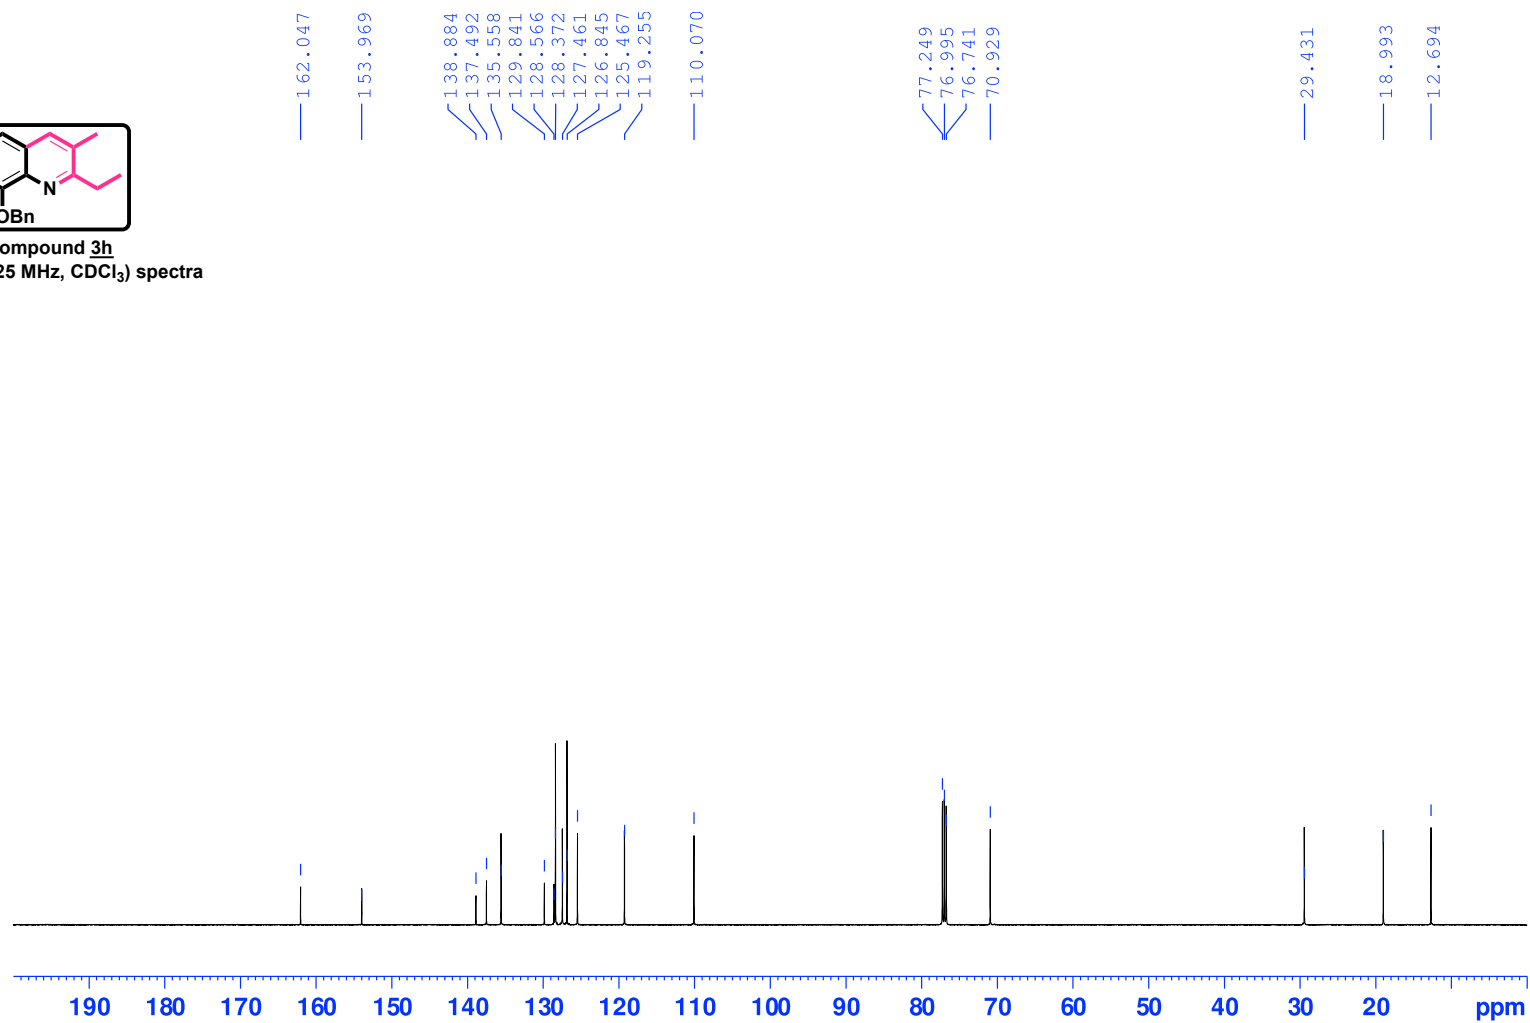

# Compound 3i

1H KKC-708 sep21-22 0911

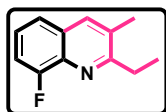

Compound 3i  
<sup>1</sup>H NMR (500 MHz, CDCl<sub>3</sub>) spectra

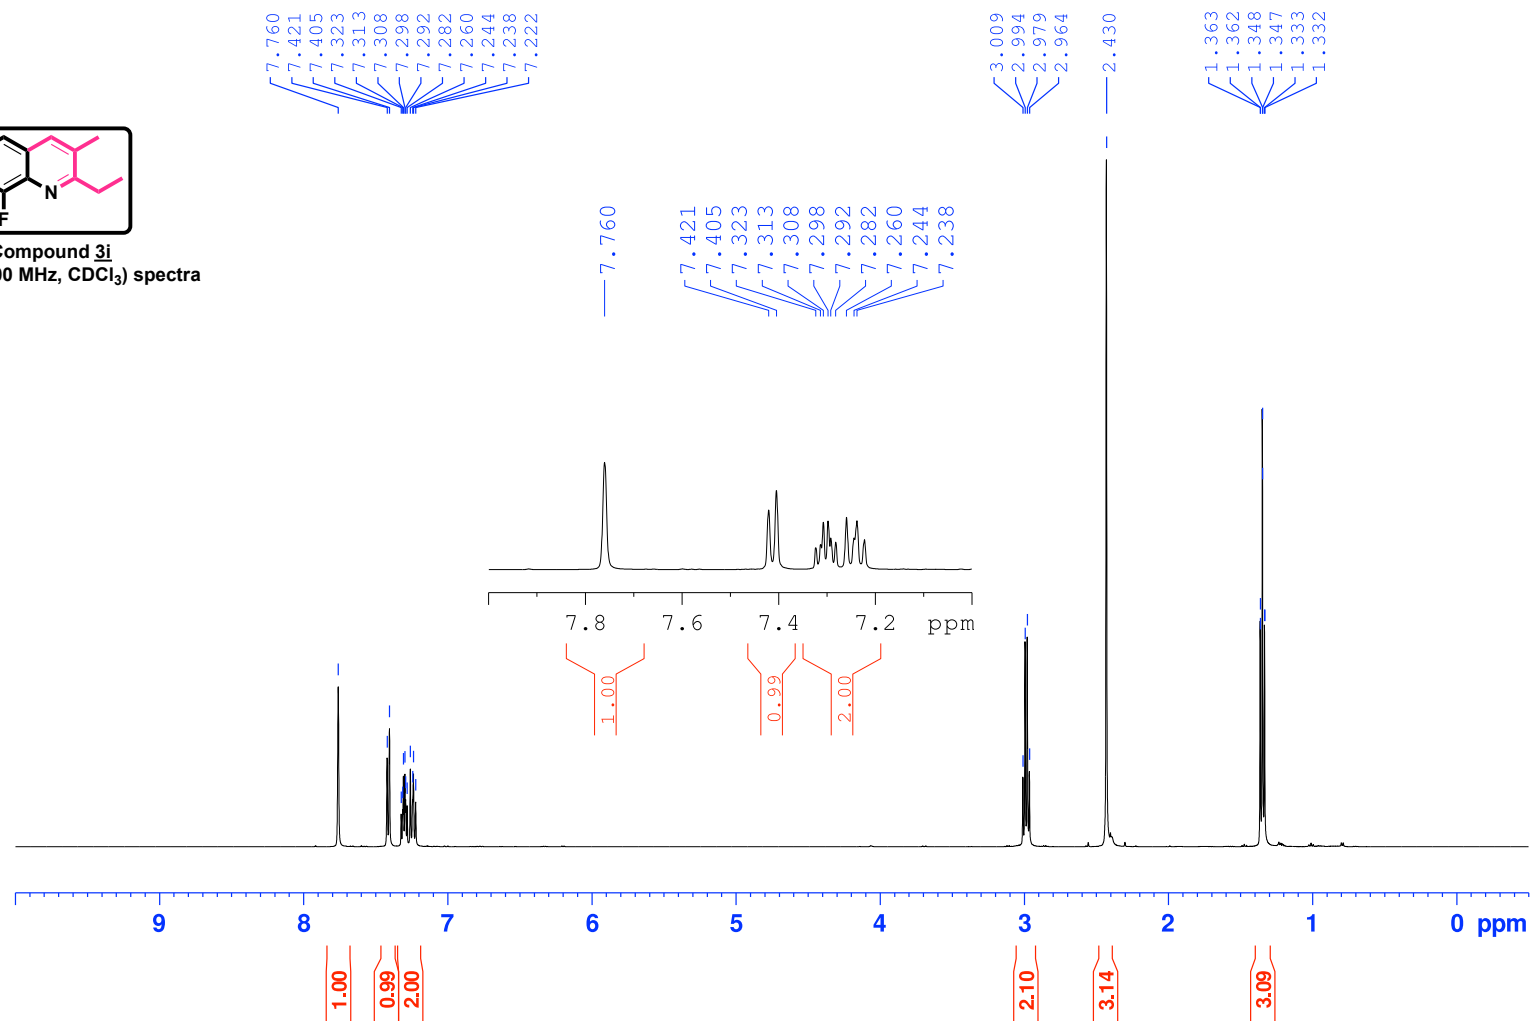

## Compound 3i

13C CKC-708 sep21-22 0911

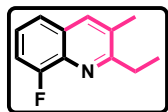

Compound 3i

<sup>13</sup>C NMR (125 MHz, CDCl<sub>3</sub>) spectra

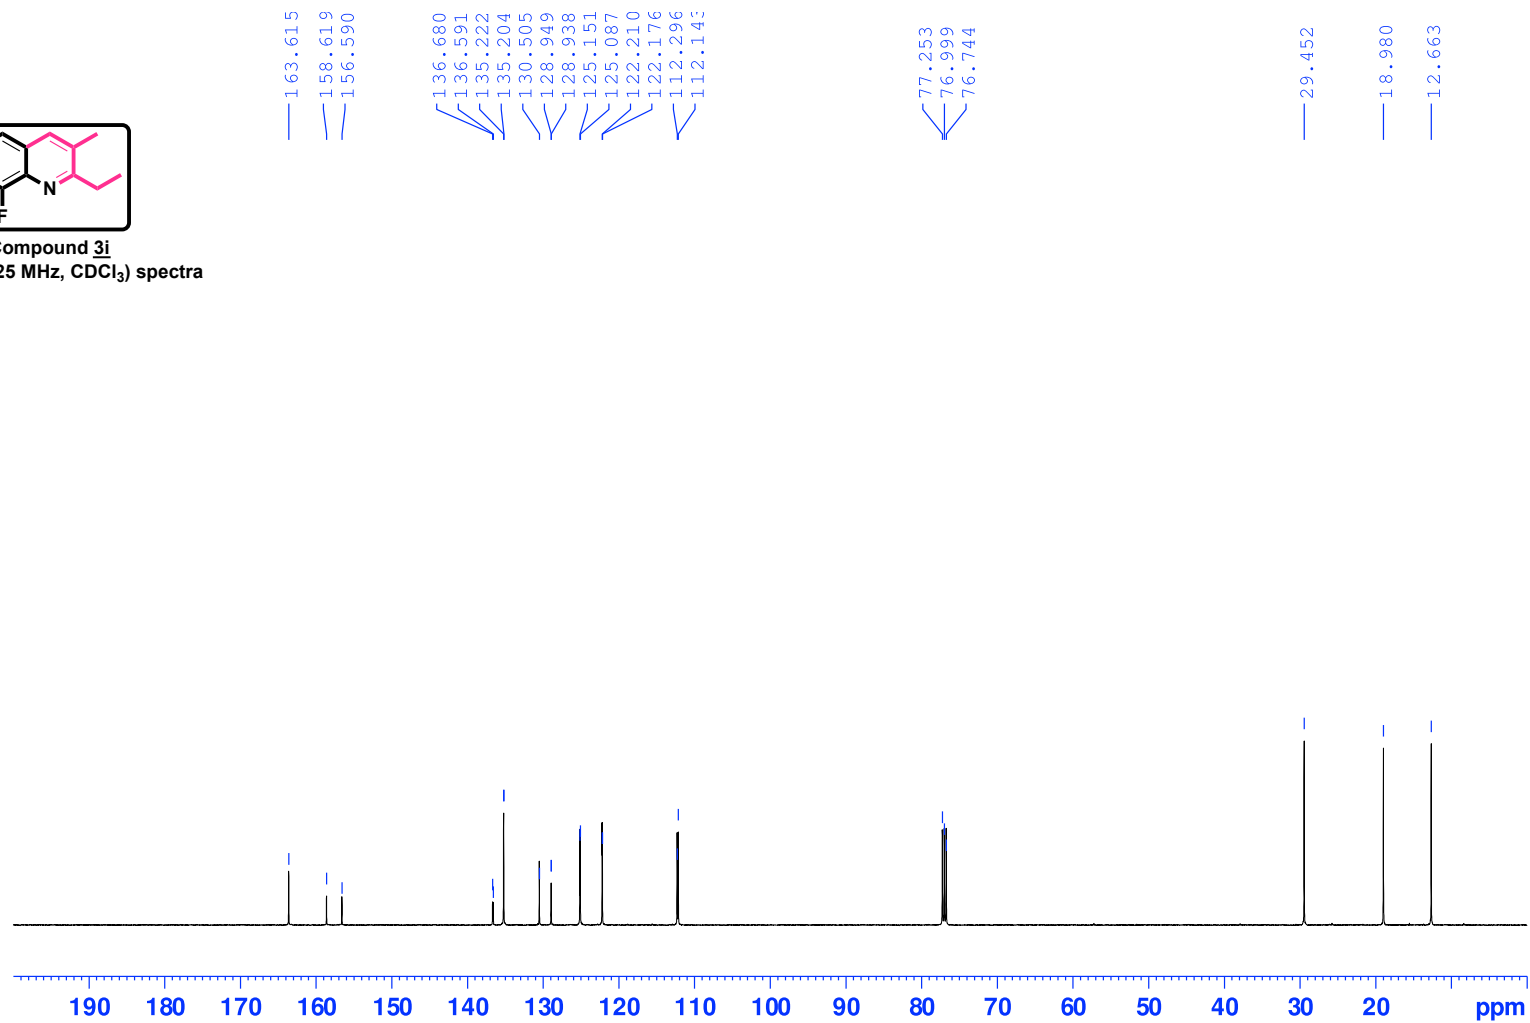

# Compound 3j

1H CKC-707 sep35-36 0909

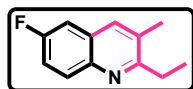

Compound **3j**

<sup>1</sup>H NMR (500 MHz, CDCl<sub>3</sub>) spectra

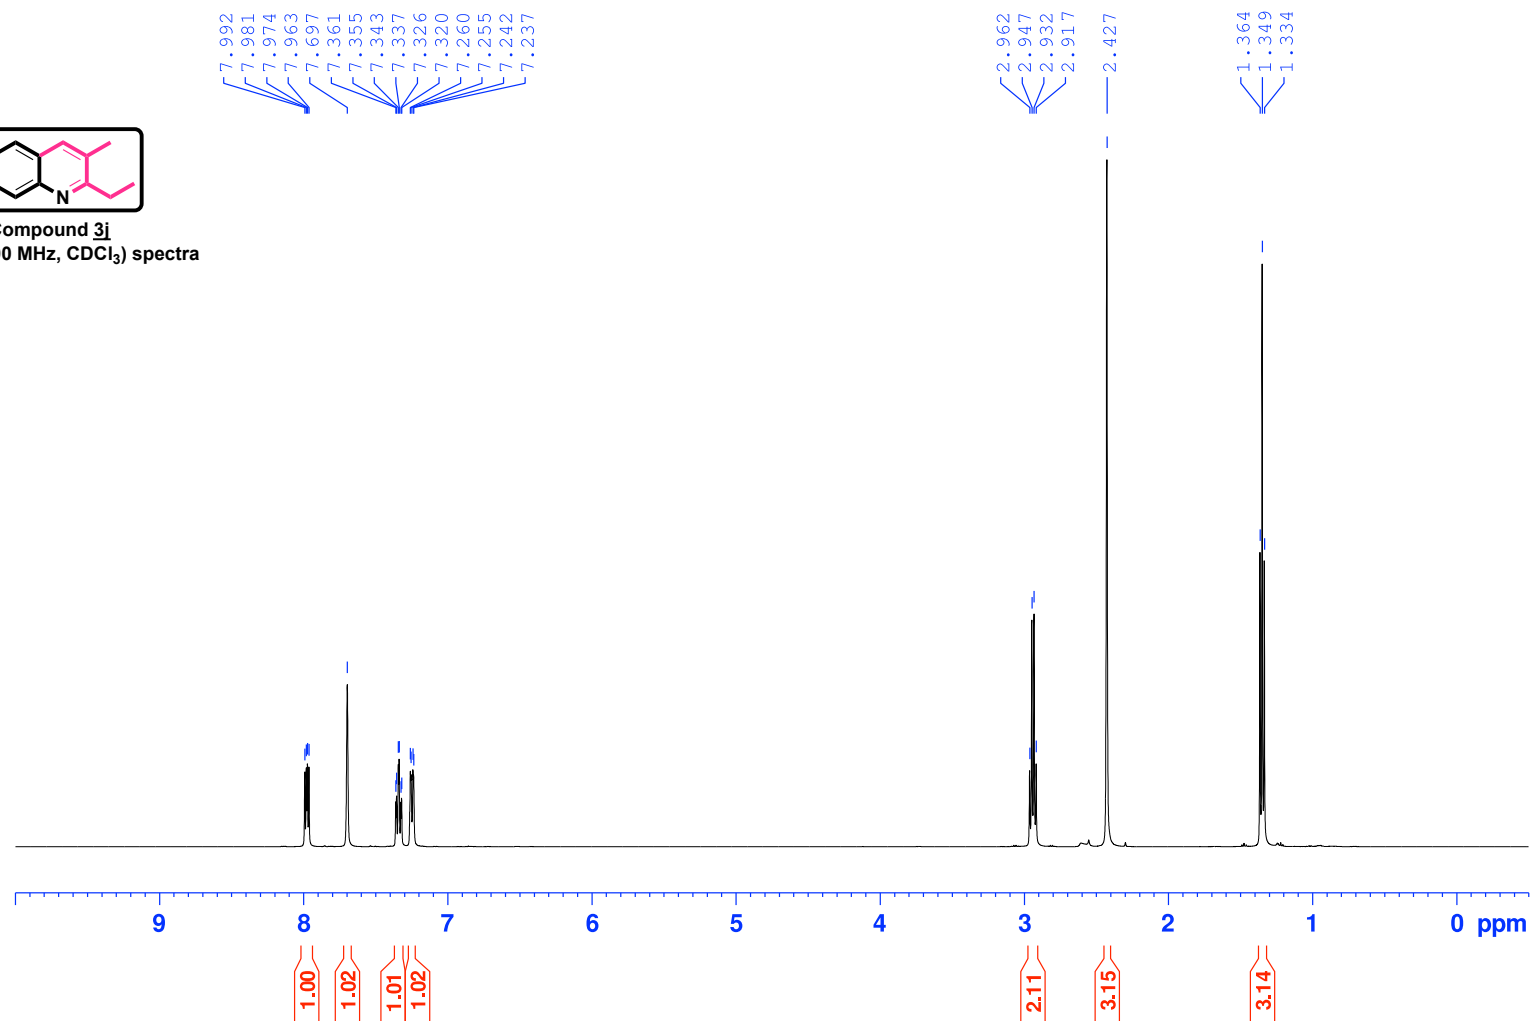

## Compound 3j

13C CKC-707 sep35-36 0909

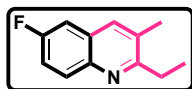

Compound **3j**

<sup>13</sup>C NMR (125 MHz, CDCl<sub>3</sub>) spectra

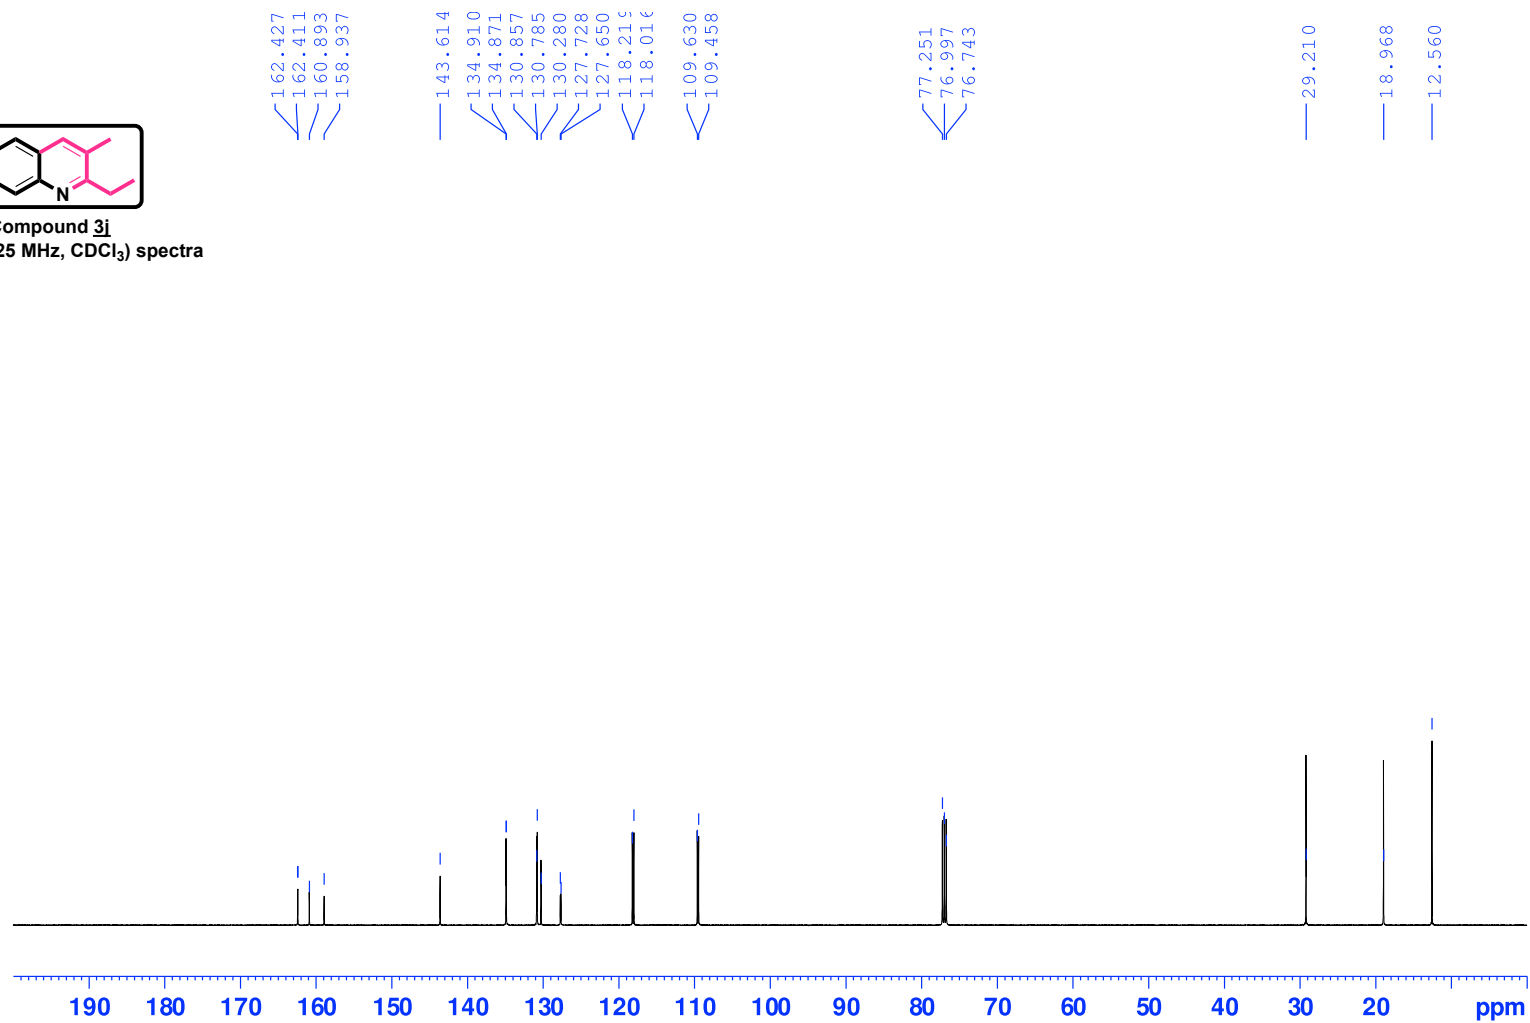

# Compound 3k

<sup>1</sup>H CKC-709 sep30-31 0915

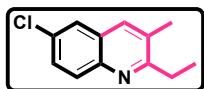

Compound 3k

<sup>1</sup>H NMR (500 MHz, CDCl<sub>3</sub>) spectra

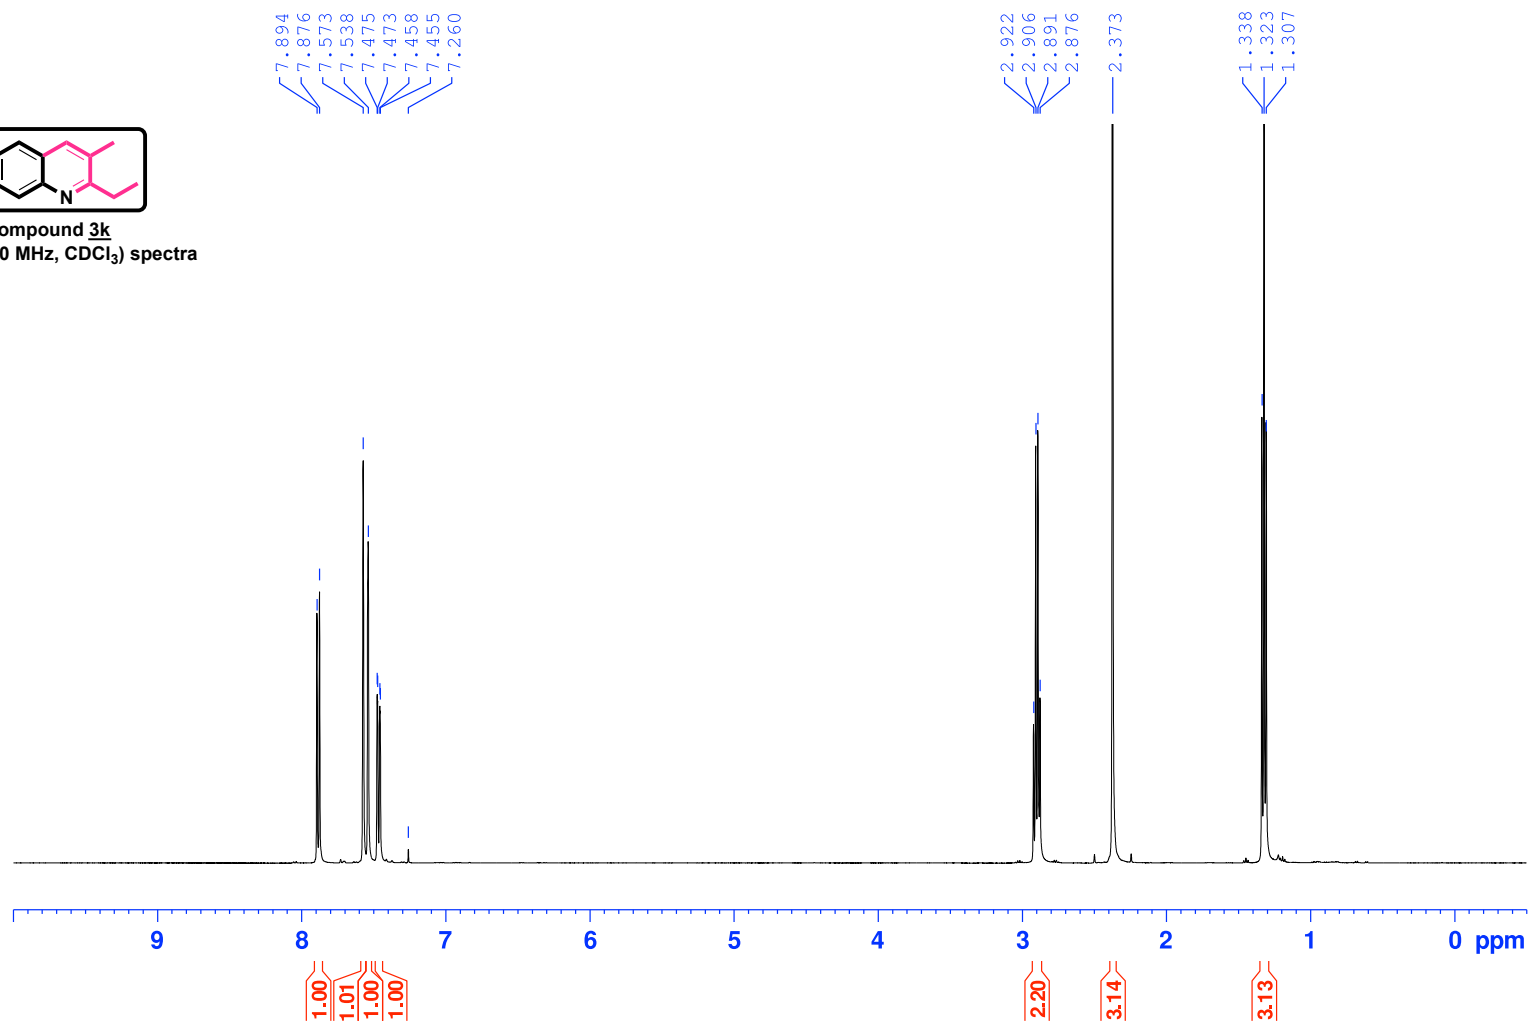



# Compound 3k

13C CKC-709 sep30-31 0915

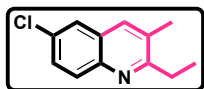

Compound **3k**

<sup>13</sup>C NMR (125 MHz, CDCl<sub>3</sub>) spectra

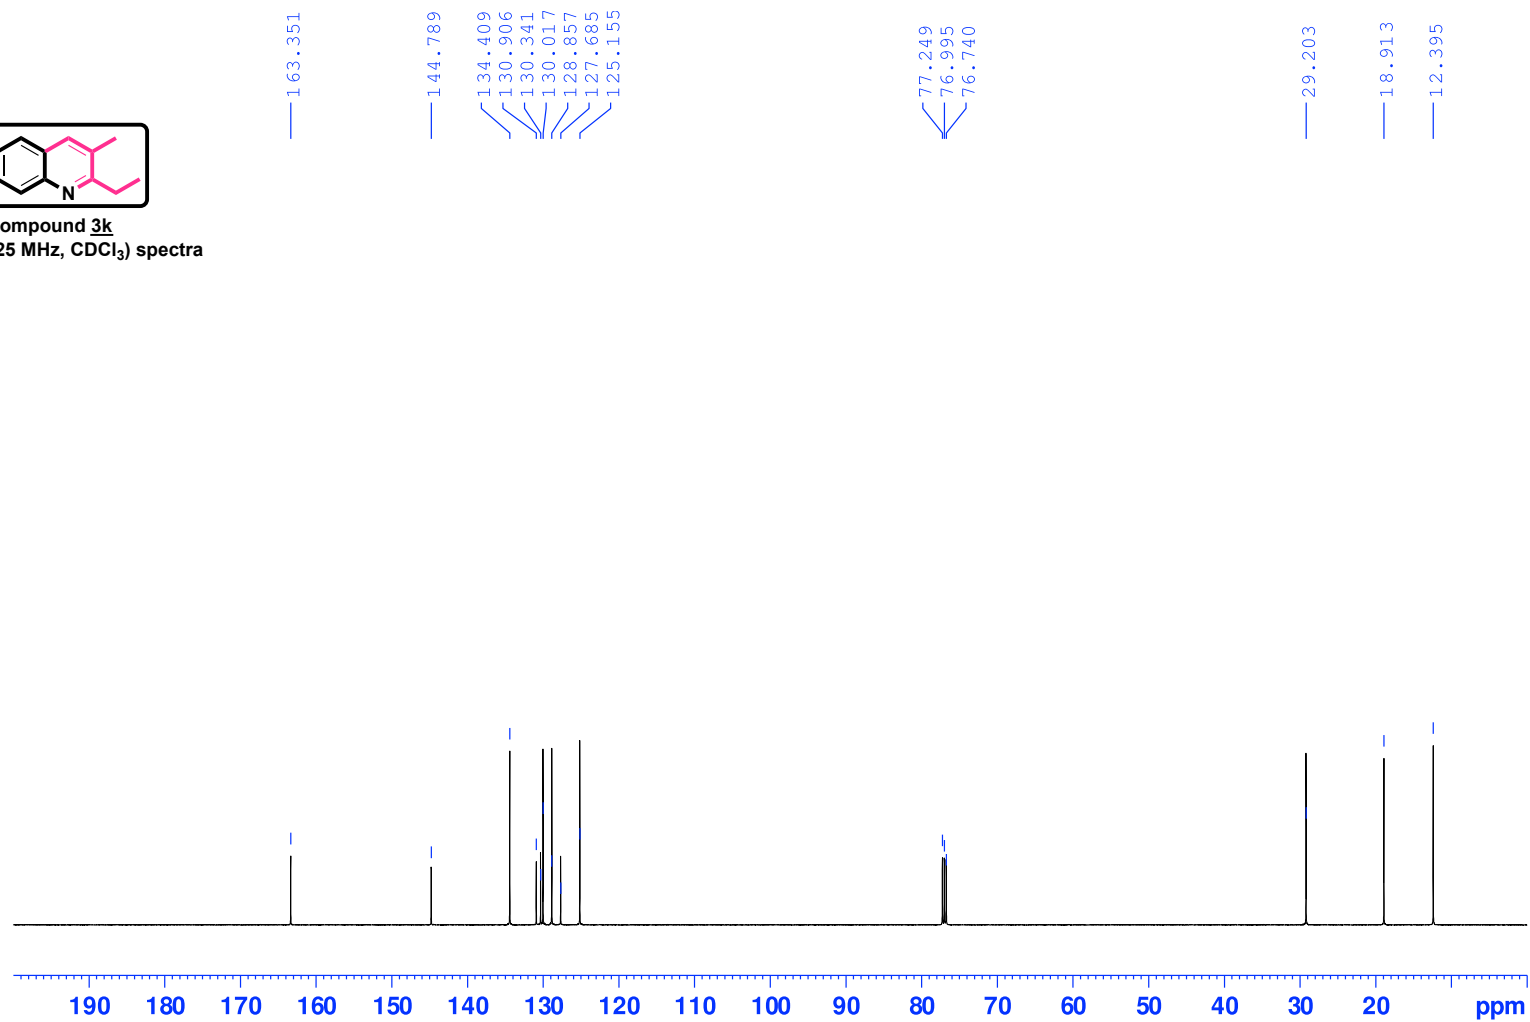

## Compound 3l

<sup>1</sup>H CKC-711 sep11-12 0916

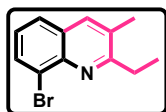

Compound 3l  
<sup>1</sup>H NMR (500 MHz, CDCl<sub>3</sub>) spectra

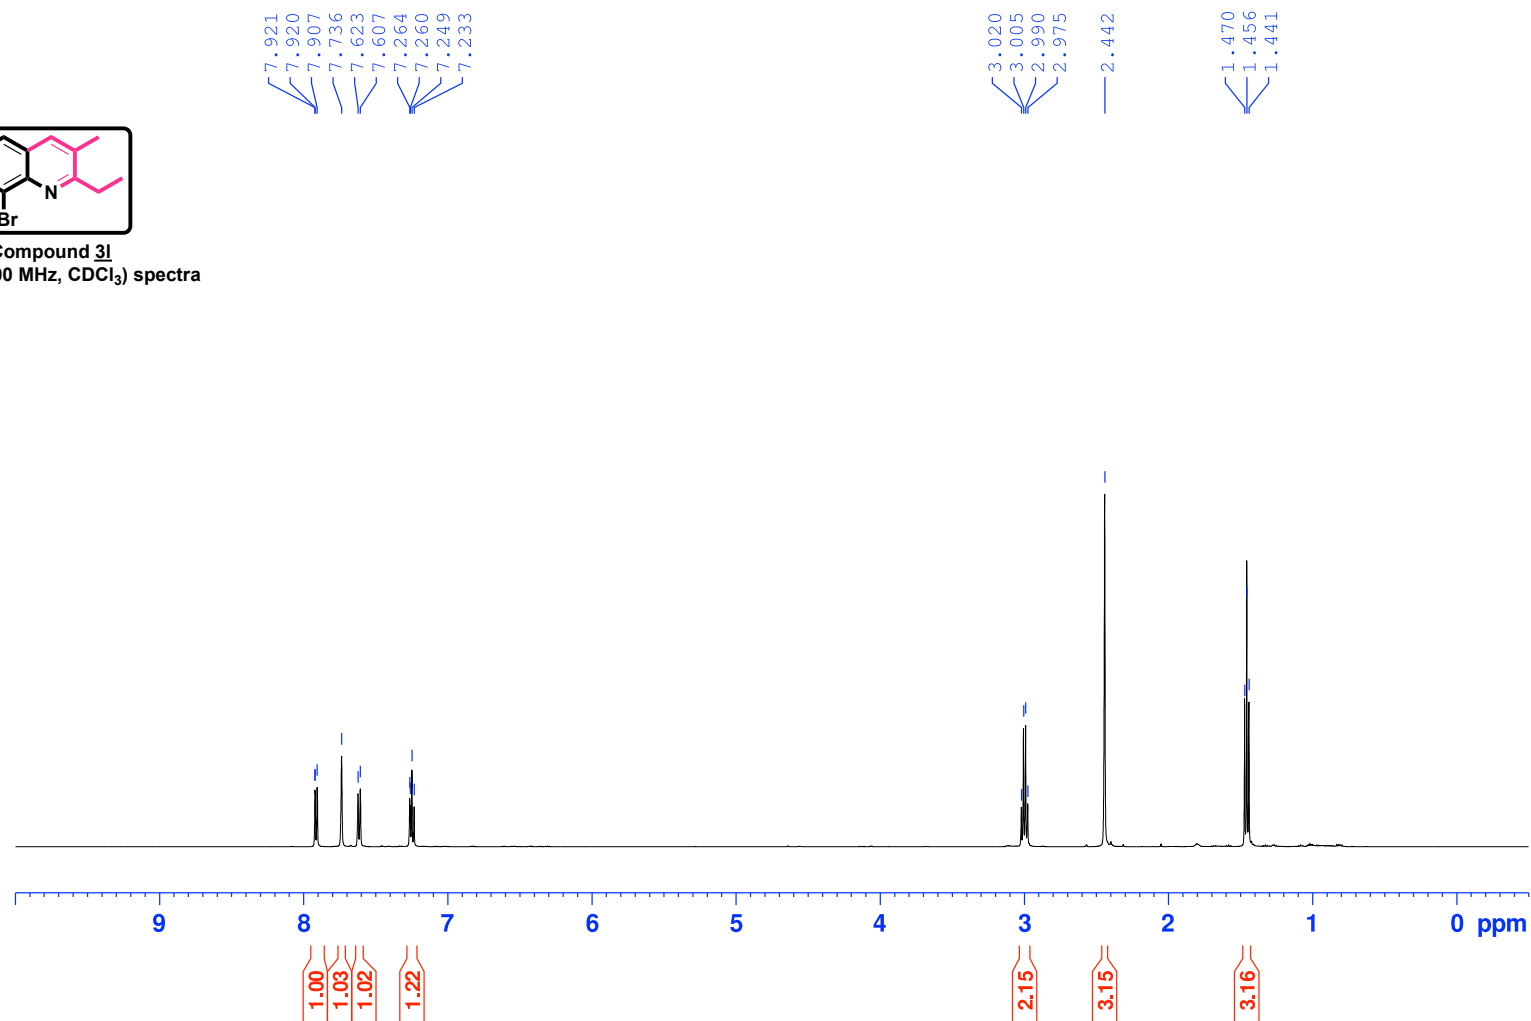

## Compound 3l

13C CKC-711 sep11-12 0916

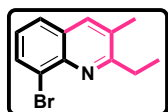

Compound 3l

<sup>13</sup>C NMR (125 MHz, CDCl<sub>3</sub>) spectra

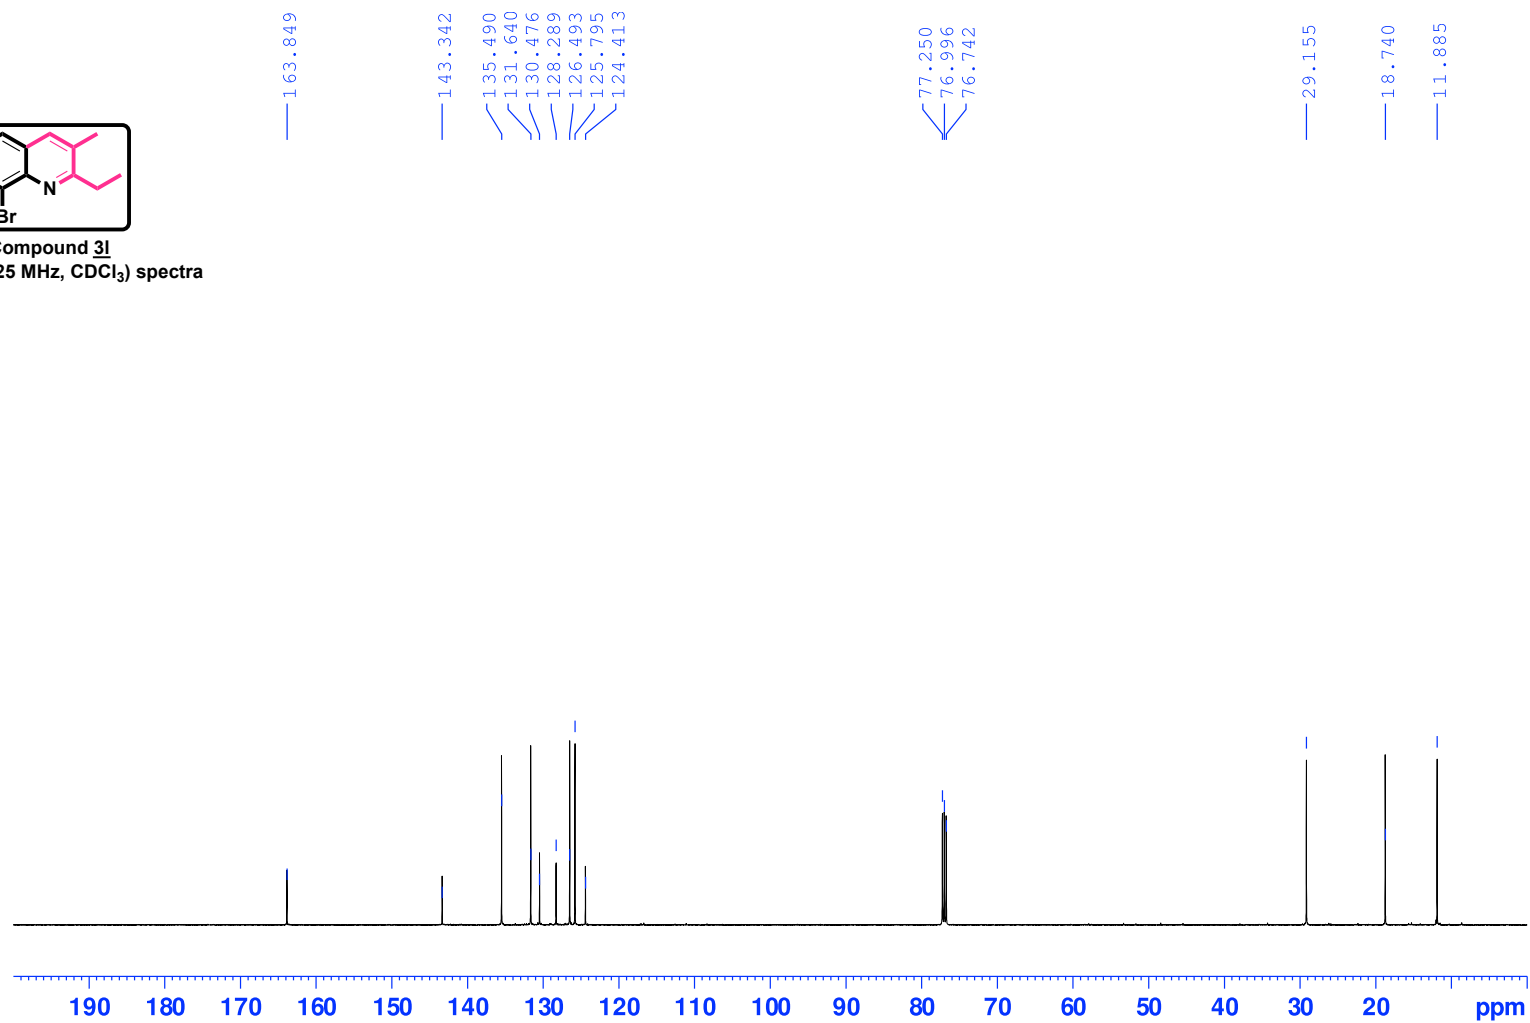

## Compound 3m

<sup>1</sup>H CKC-710 sep25-26 0915

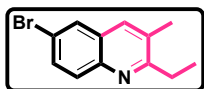

Compound **3m**

<sup>1</sup>H NMR (500 MHz, CDCl<sub>3</sub>) spectra

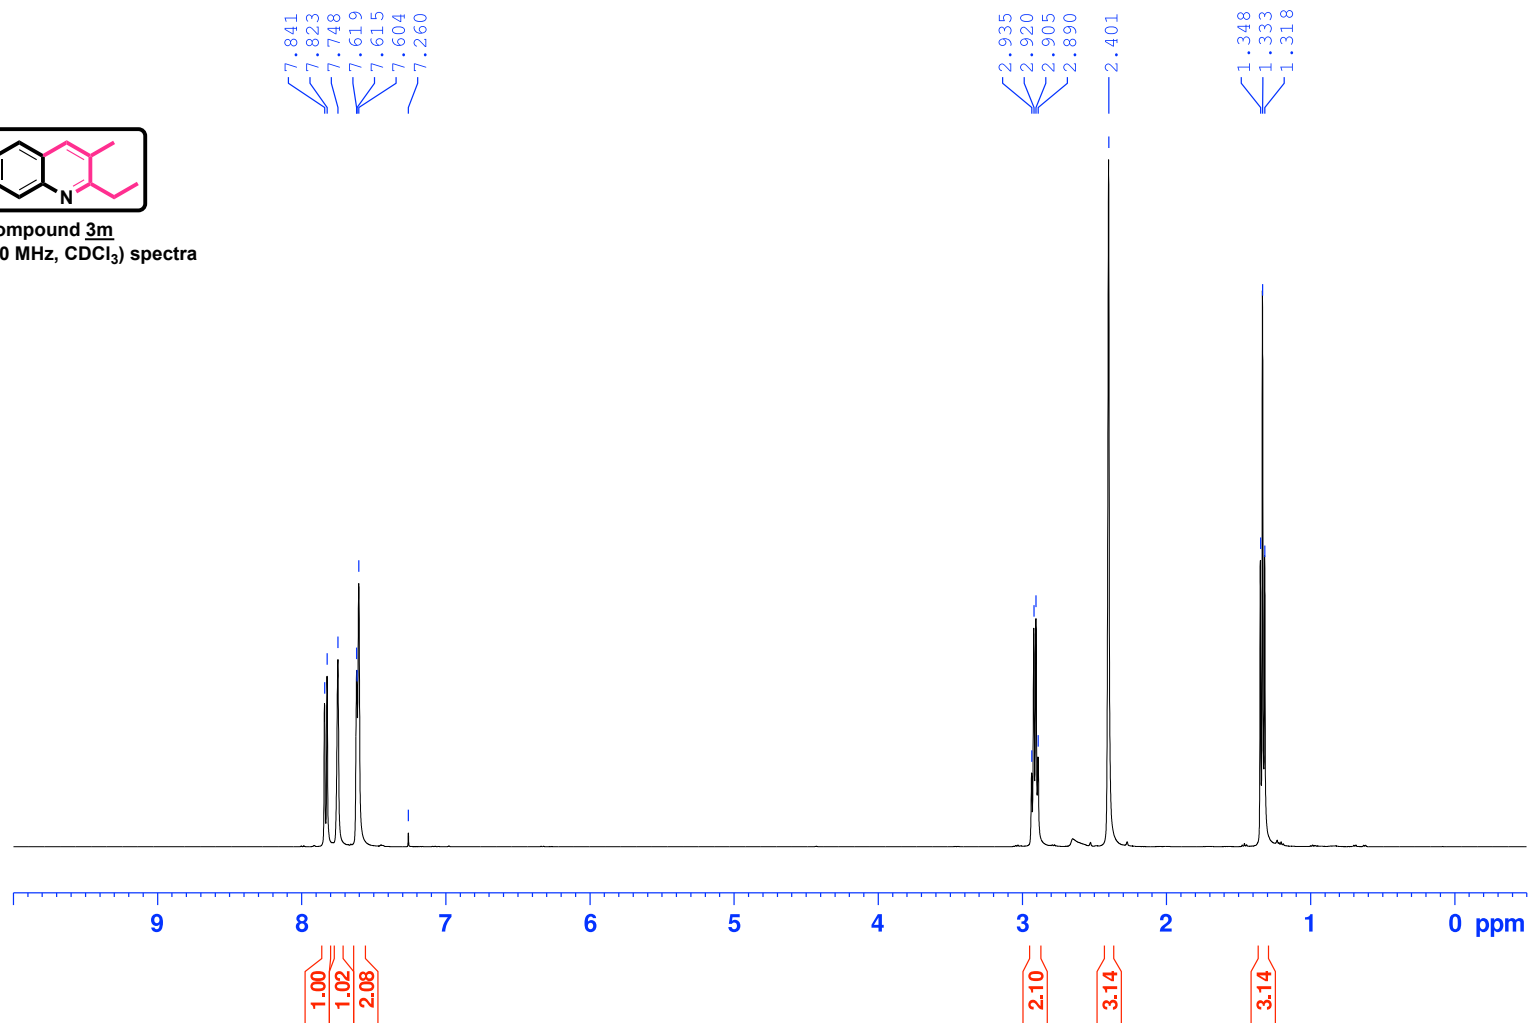

## Compound 3m

13C CKC-710 sep25-26 0915

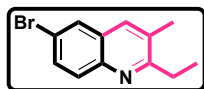

Compound **3m**

<sup>13</sup>C NMR (125 MHz, CDCl<sub>3</sub>) spectra

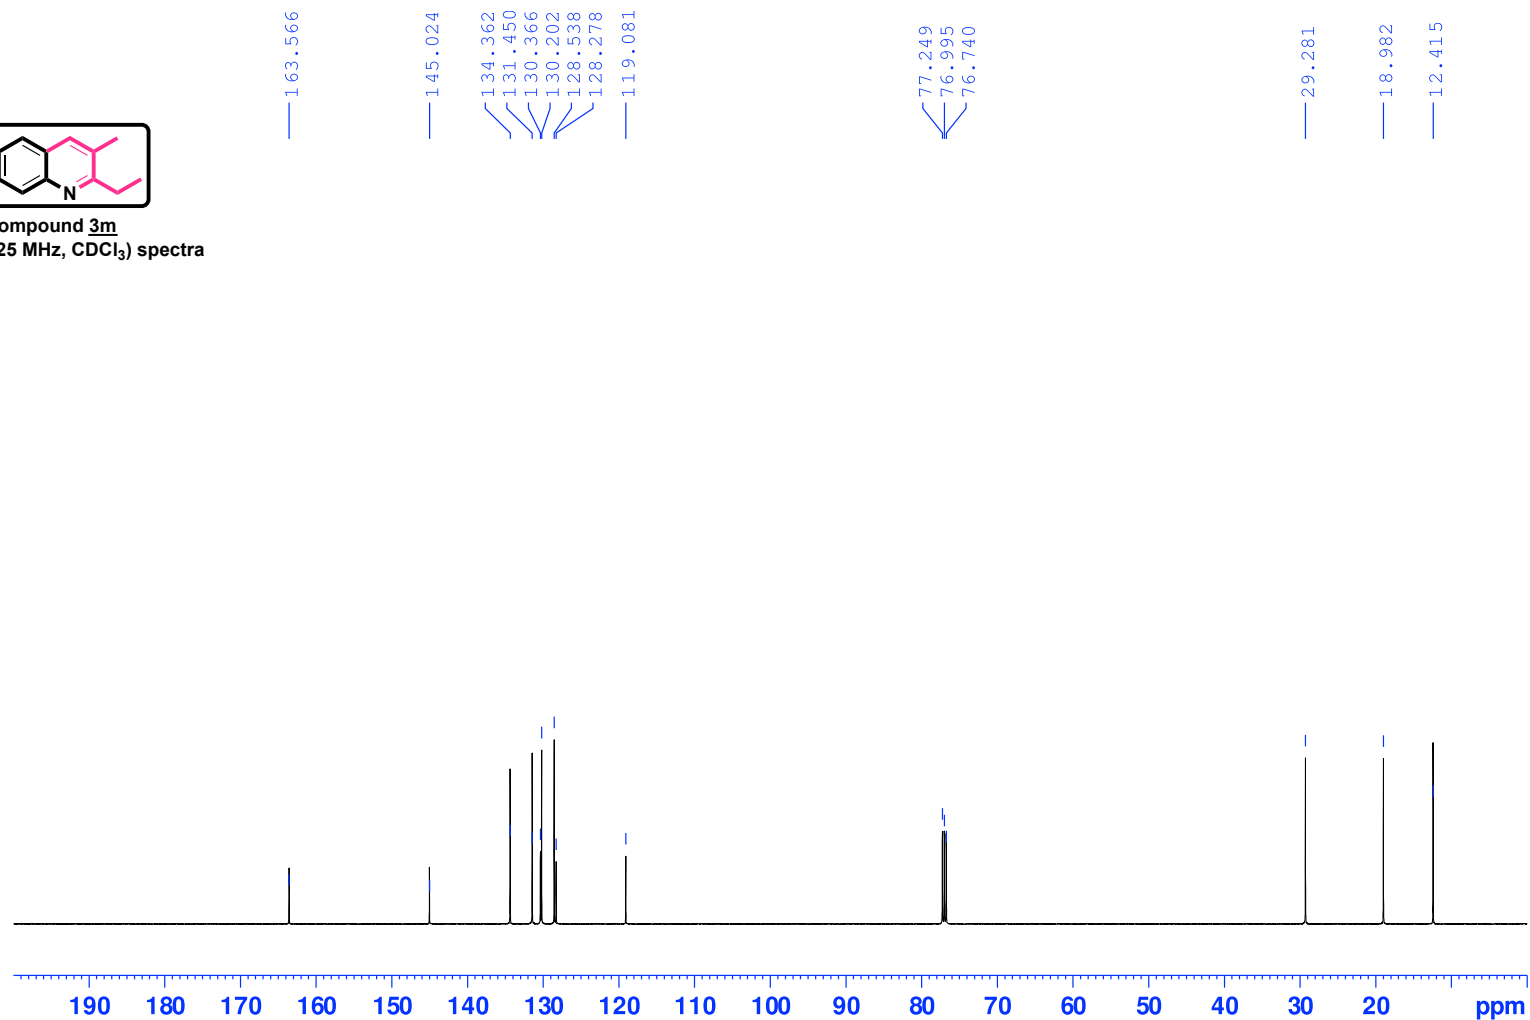

# Compound 3n

1H CKC-713 sep15-16 0923

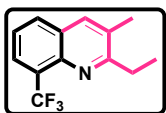

Compound 3n  
<sup>1</sup>H NMR (500 MHz, CDCl<sub>3</sub>) spectra

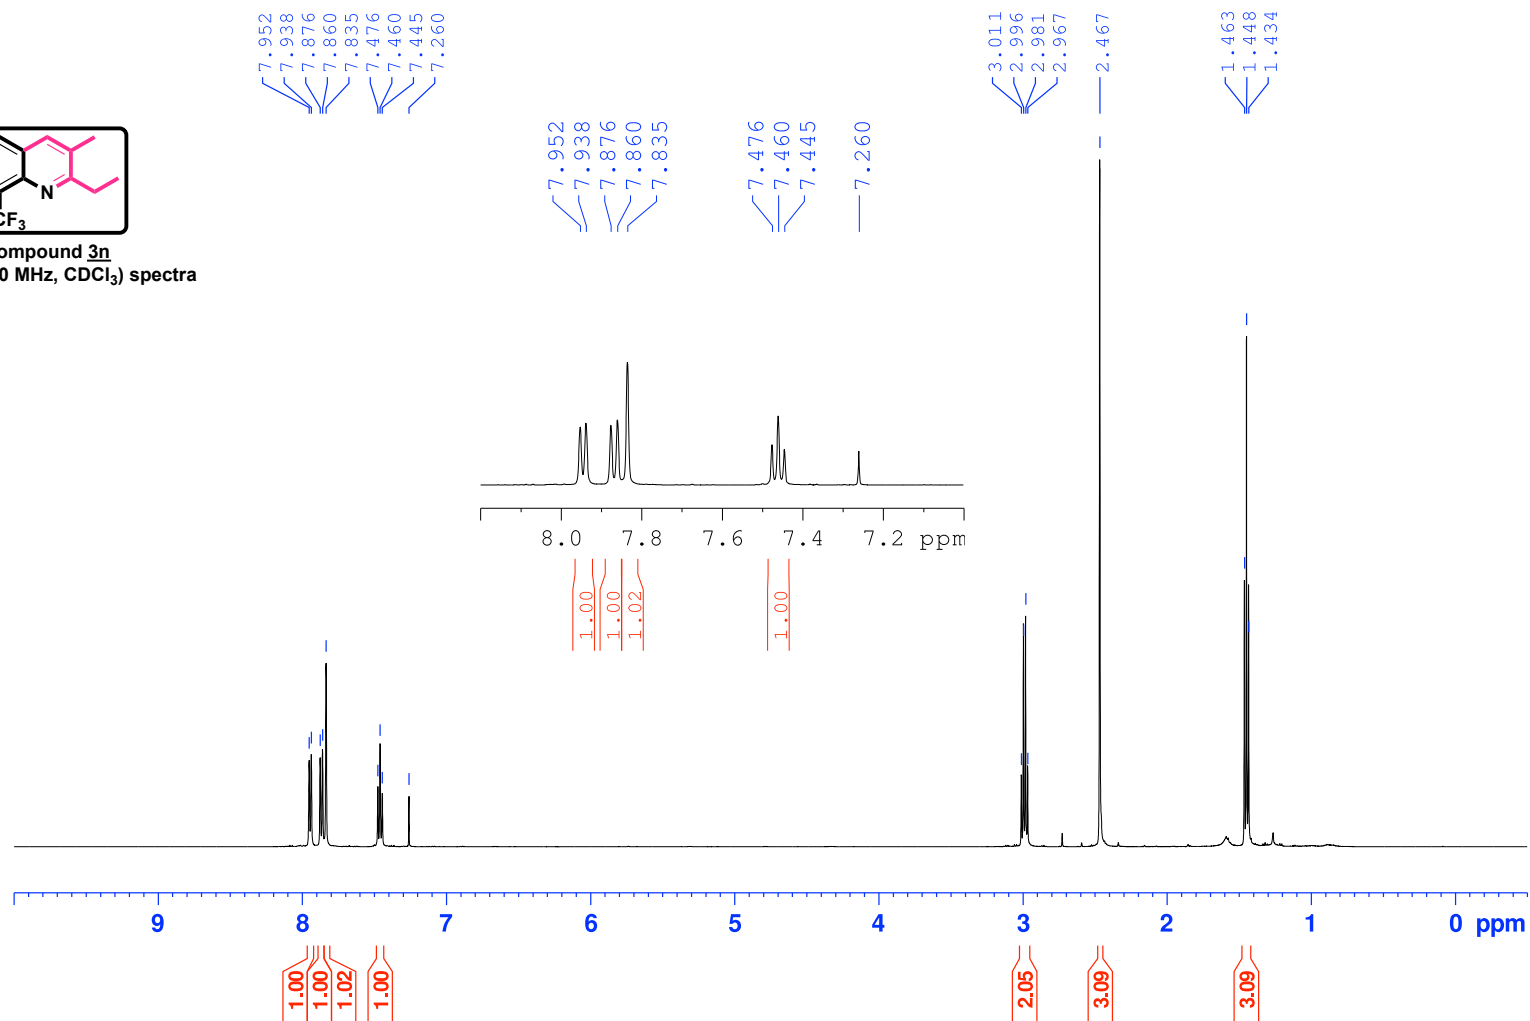

# Compound 3n

13C CKC-713 sep15-16 0923

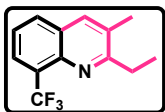

Compound 3n  
<sup>13</sup>C NMR (125 MHz, CDCl<sub>3</sub>) spectra

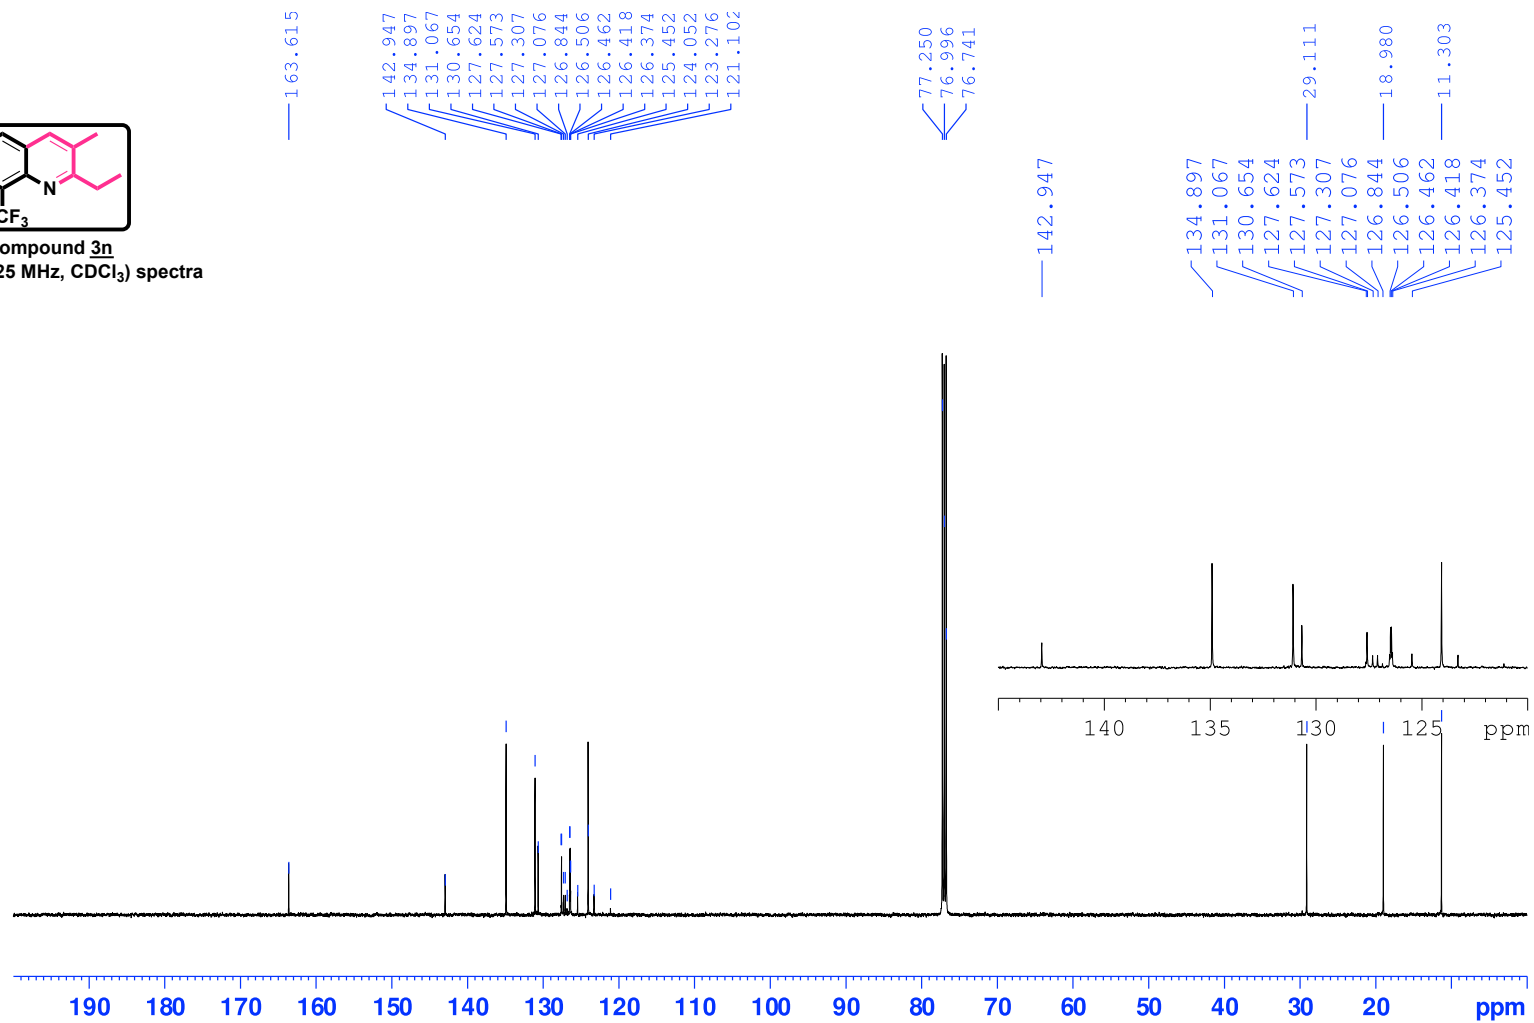

# Compound 3o

<sup>1</sup>H CKC-712 sep42-43 0923

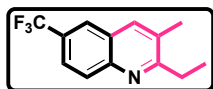

Compound 3o

<sup>1</sup>H NMR (500 MHz, CDCl<sub>3</sub>) spectra

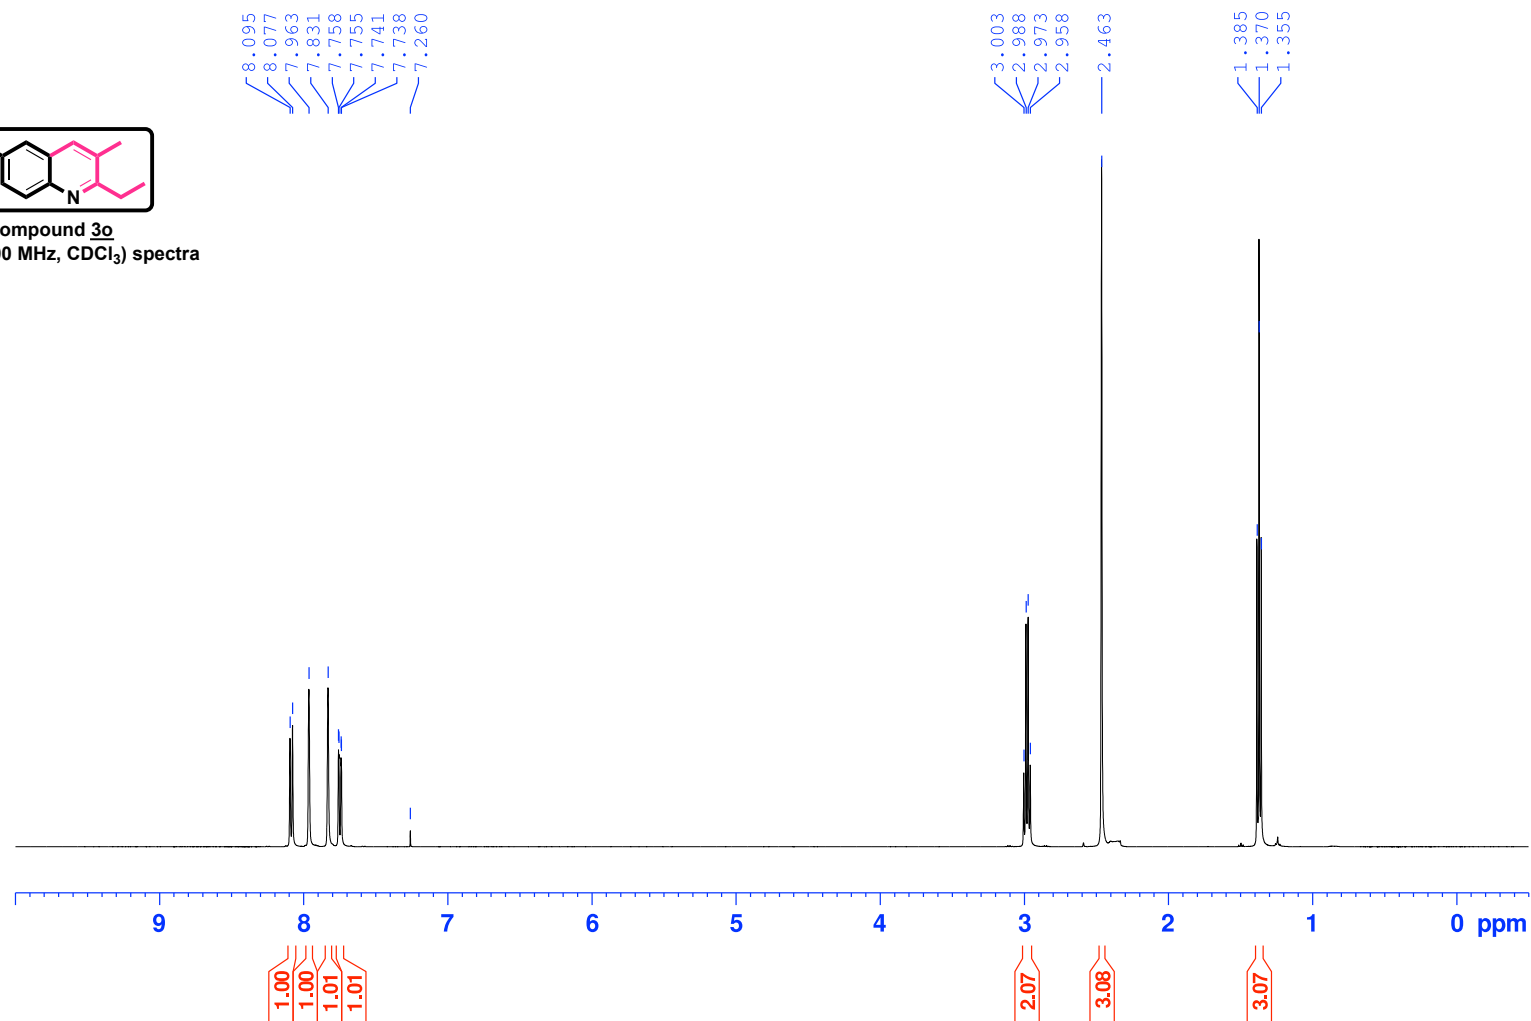



# Compound 3o

<sup>13</sup>C CKC-712 sep42-43 0923

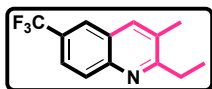

Compound 3o  
<sup>13</sup>C NMR (125 MHz, CDCl<sub>3</sub>) spectra

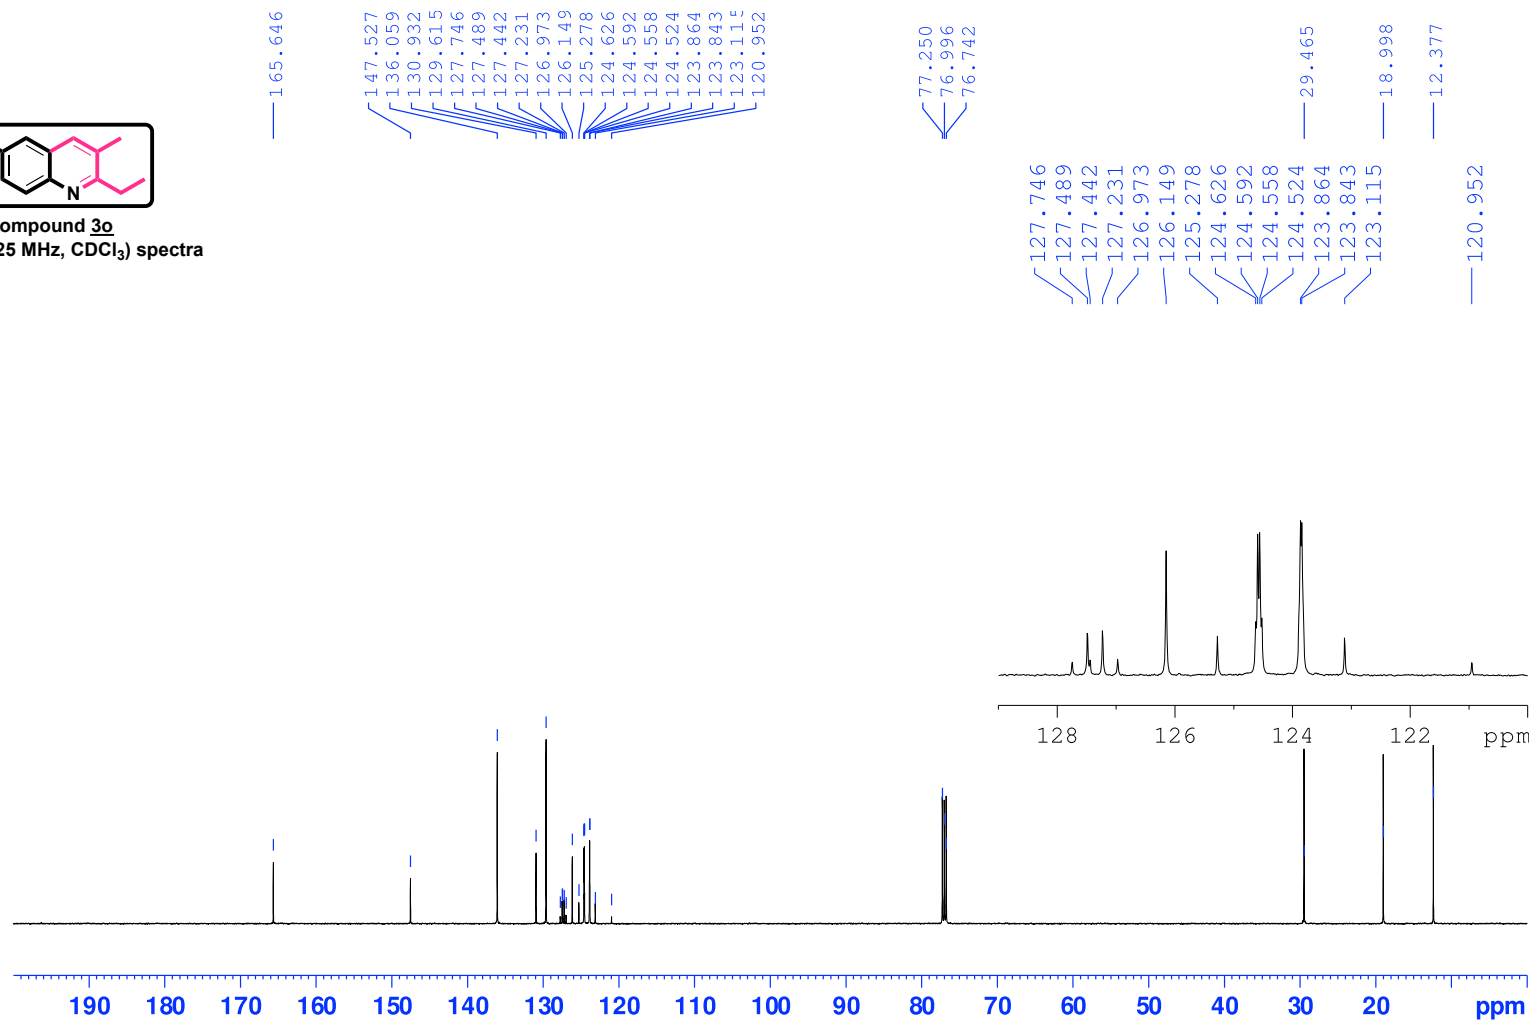

# Compound 3p

1H CCYL-089 (2) sep17-18 0528

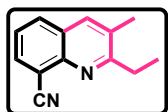

Compound 3p  
<sup>1</sup>H NMR (500 MHz, CDCl<sub>3</sub>) spectra

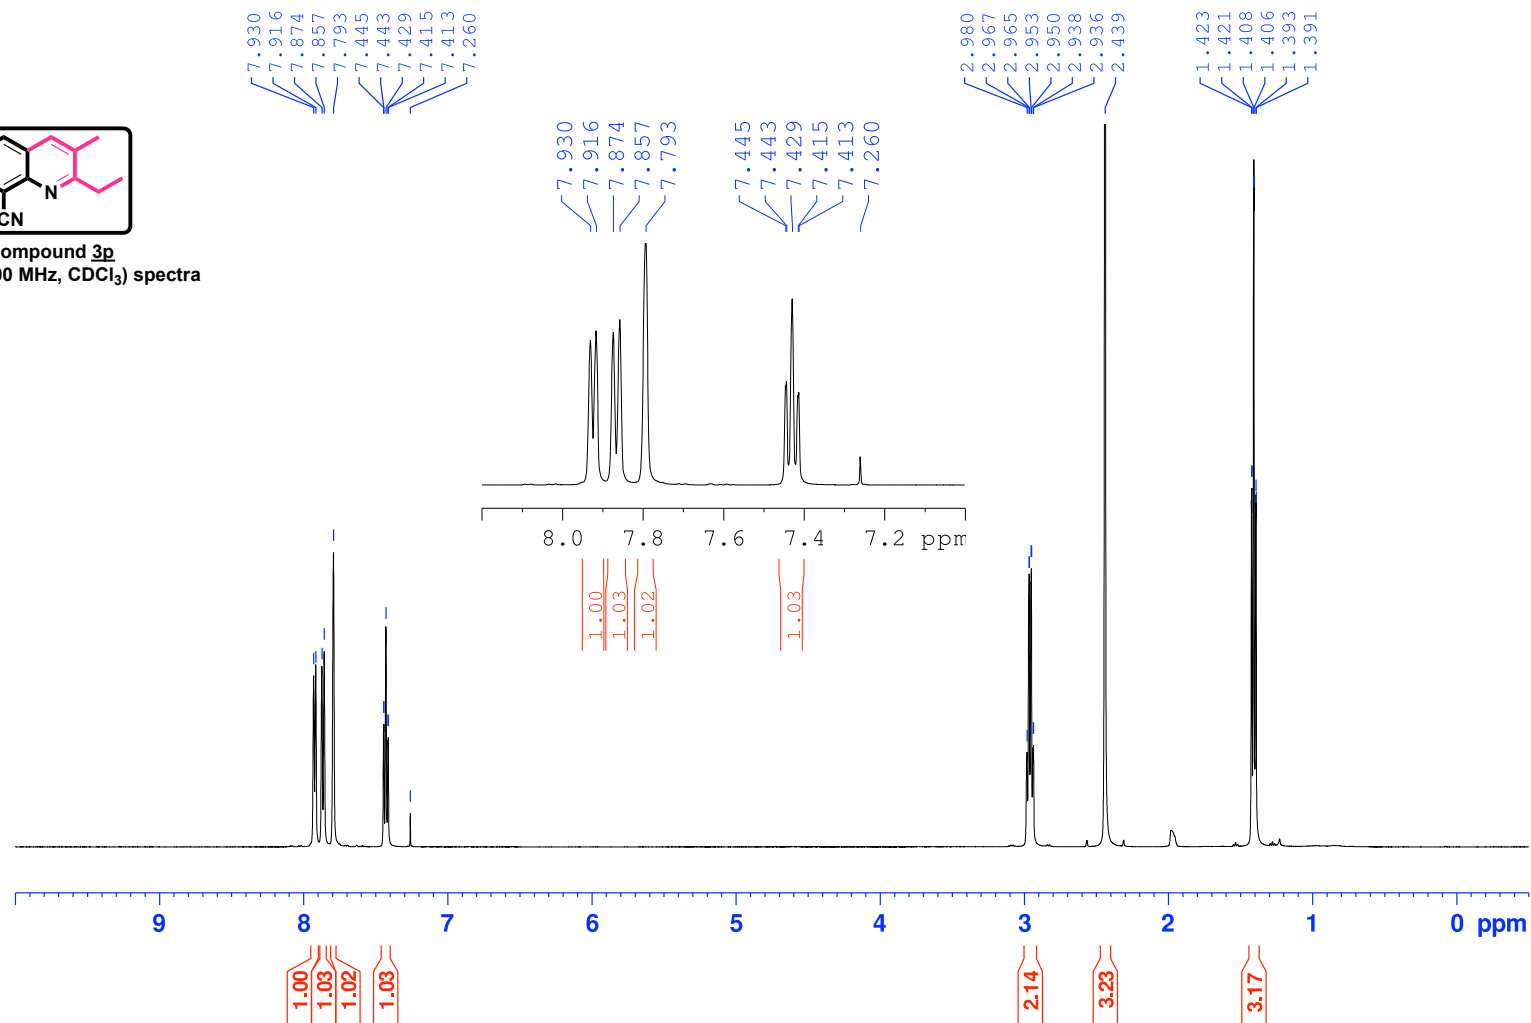

## Compound 3p

13C CCYL-089 (2) sep17-18 0528

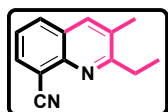

Compound 3p

<sup>13</sup>C NMR (125 MHz, CDCl<sub>3</sub>) spectra

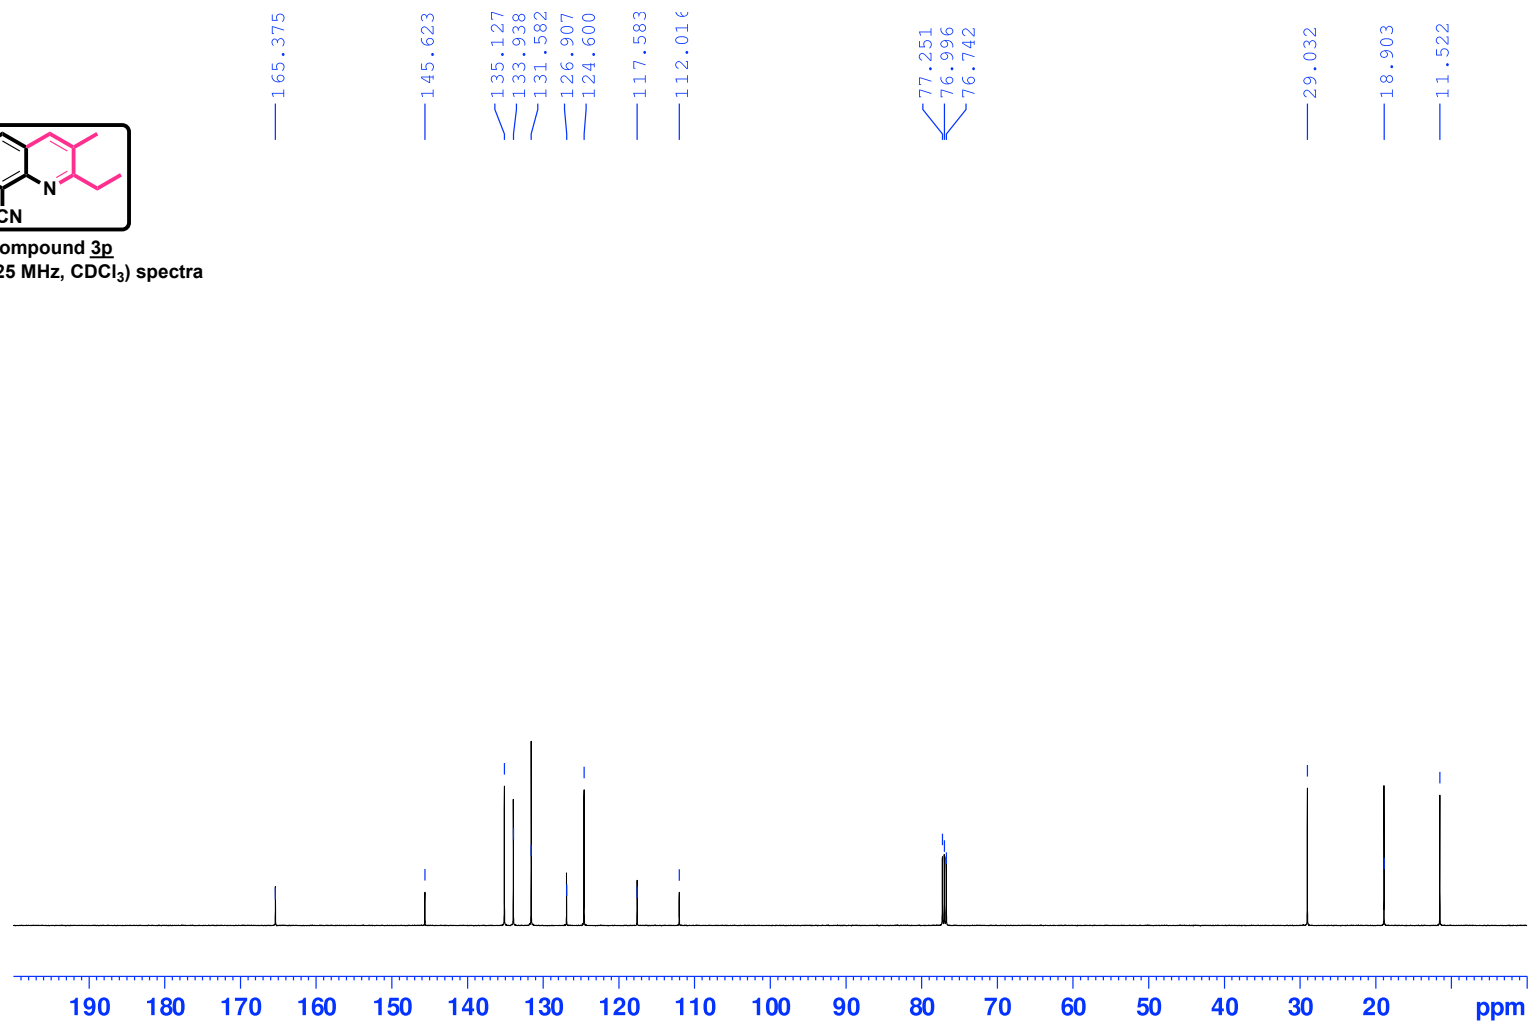

# Compound 5a

1H KKC-467 A0proCHO 0504

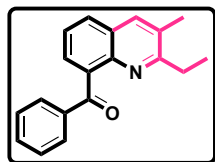

Compound **5a**

<sup>1</sup>H NMR (500 MHz, CDCl<sub>3</sub>) spectra

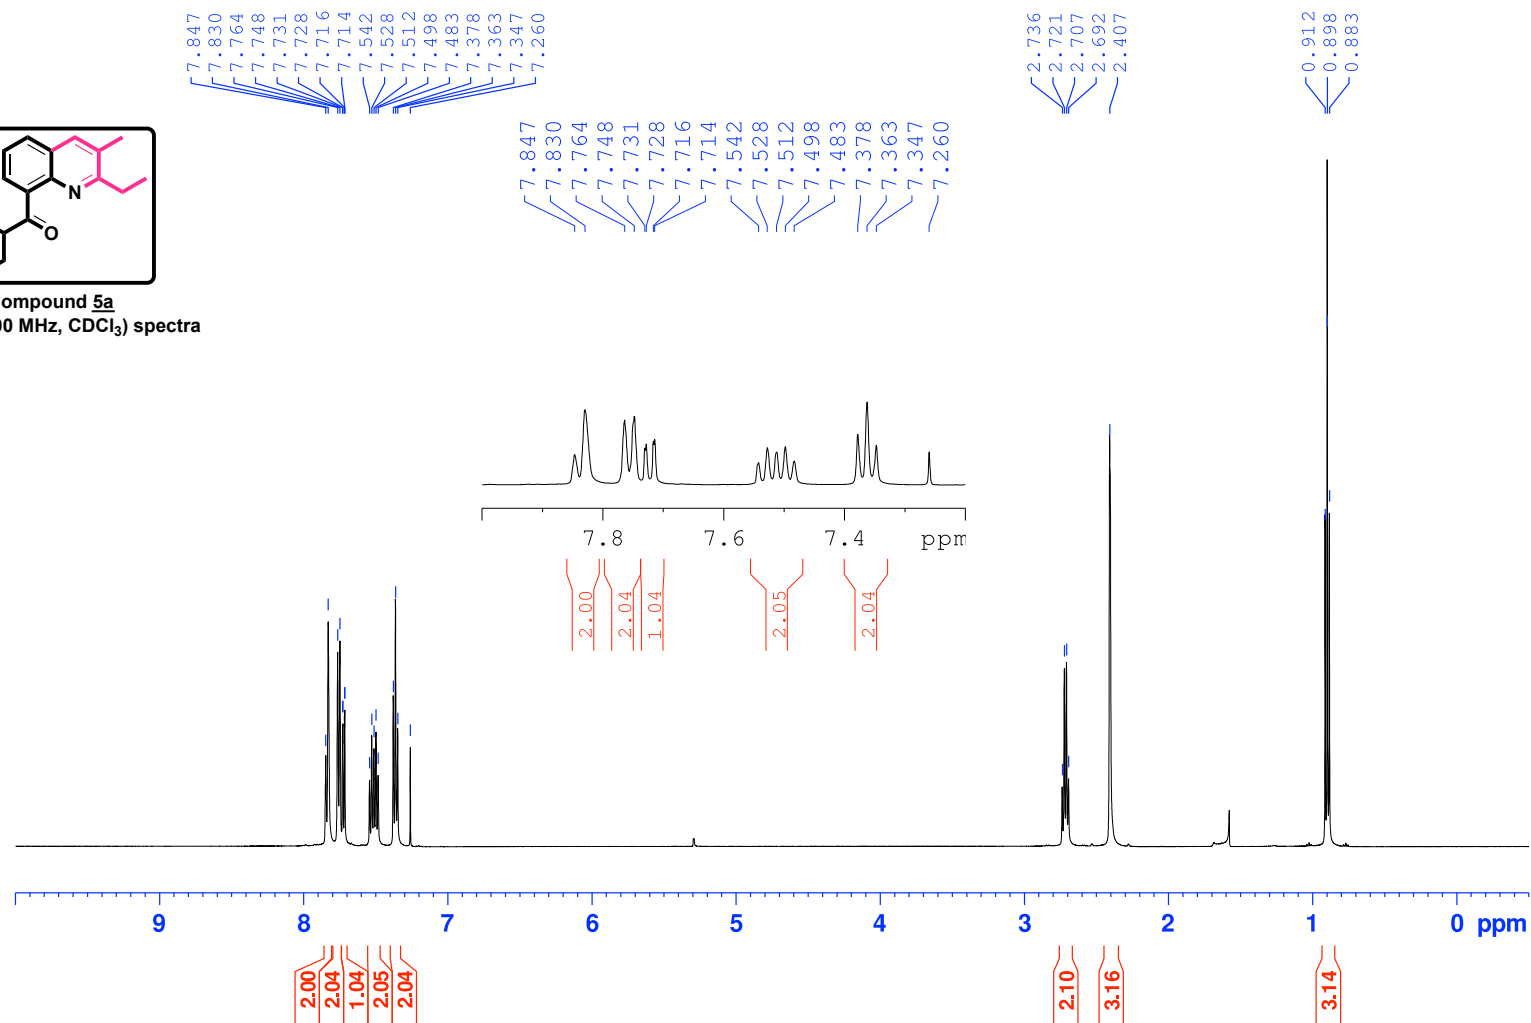

# Compound 5a

13C CKC-467 A0proCHO 0504

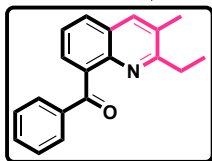

Compound 5a

<sup>13</sup>C NMR (125 MHz, CDCl<sub>3</sub>) spectra

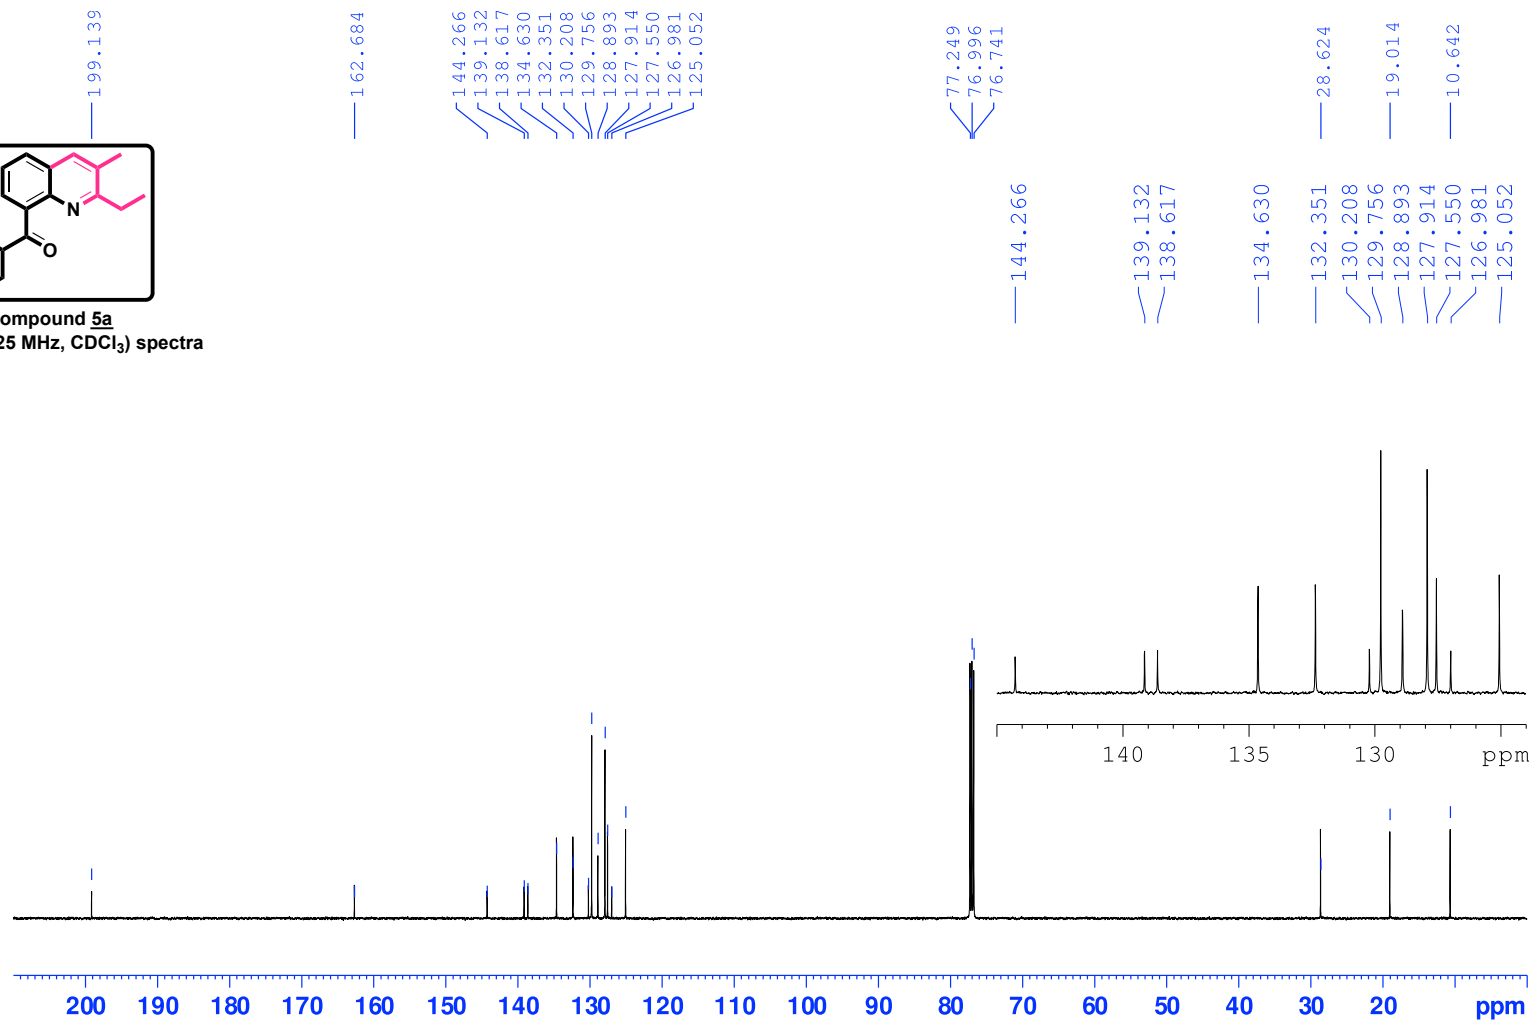

# Compound 5b

1H CYL-086 sep36-37 0525

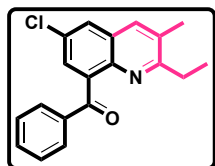

Compound **5b**

<sup>1</sup>H NMR (500 MHz, CDCl<sub>3</sub>) spectra

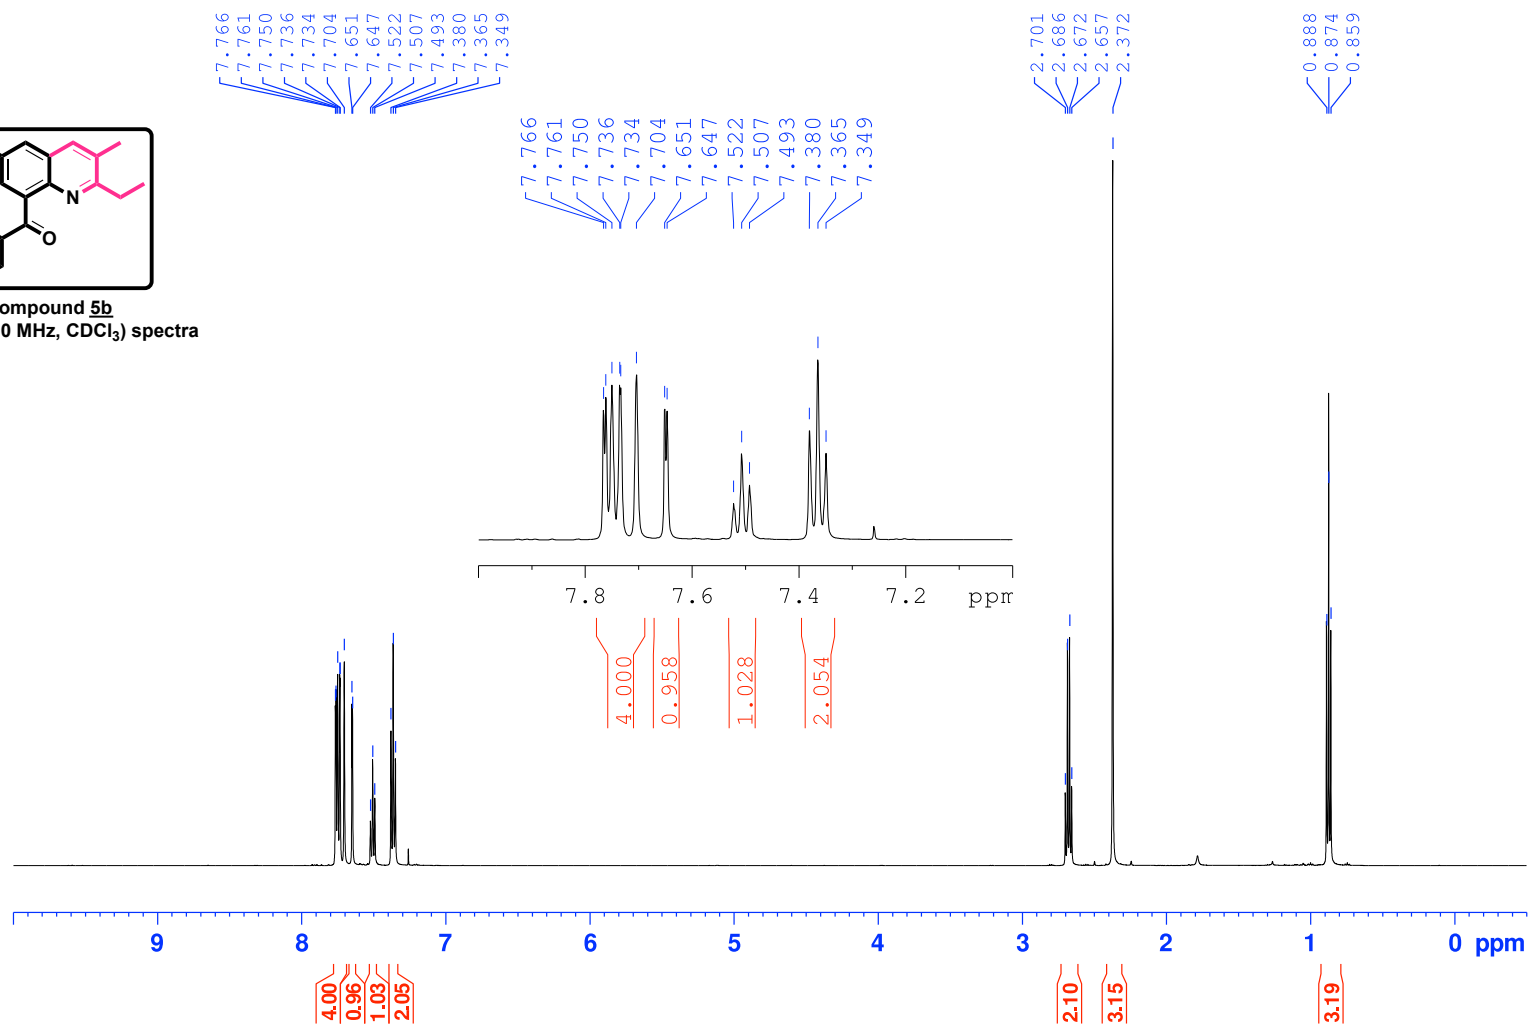

## Compound 5b

13C CYL-086 sep36-37 0525

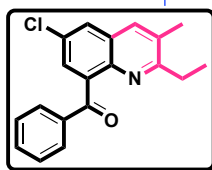

Compound **5b**

<sup>13</sup>C NMR (125 MHz, CDCl<sub>3</sub>) spectra

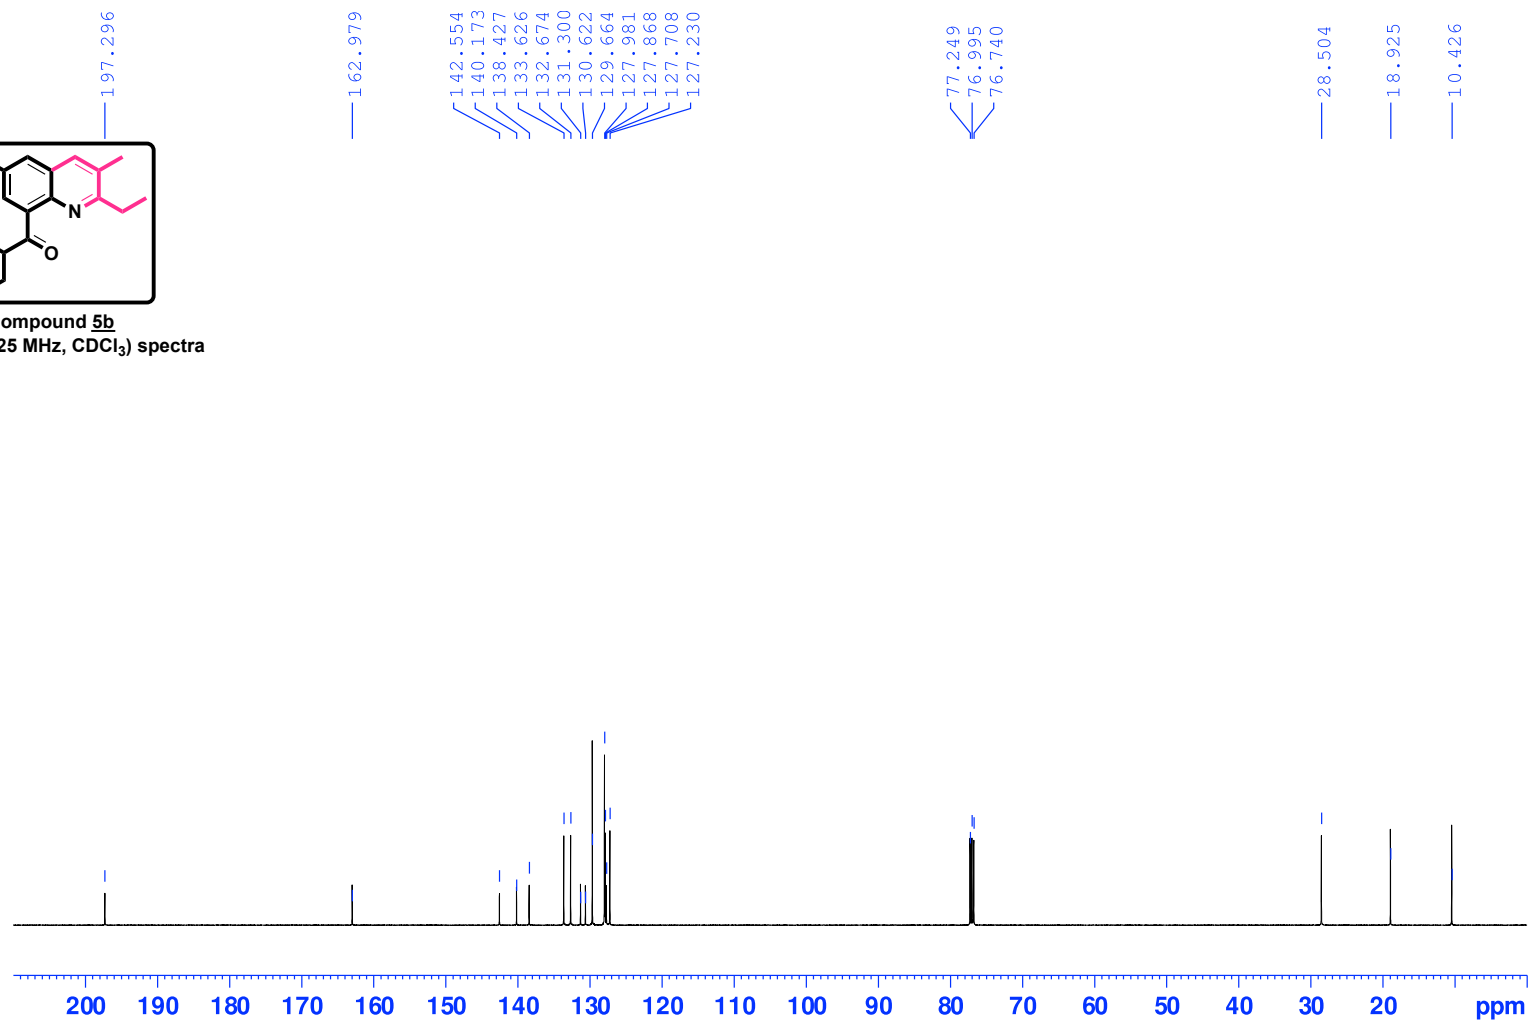

# Compound 5c

1H CKC-721 sep34-35 0929

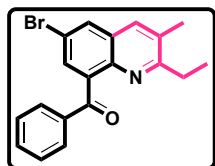

Compound **5c**  
<sup>1</sup>H NMR (500 MHz, CDCl<sub>3</sub>) spectra

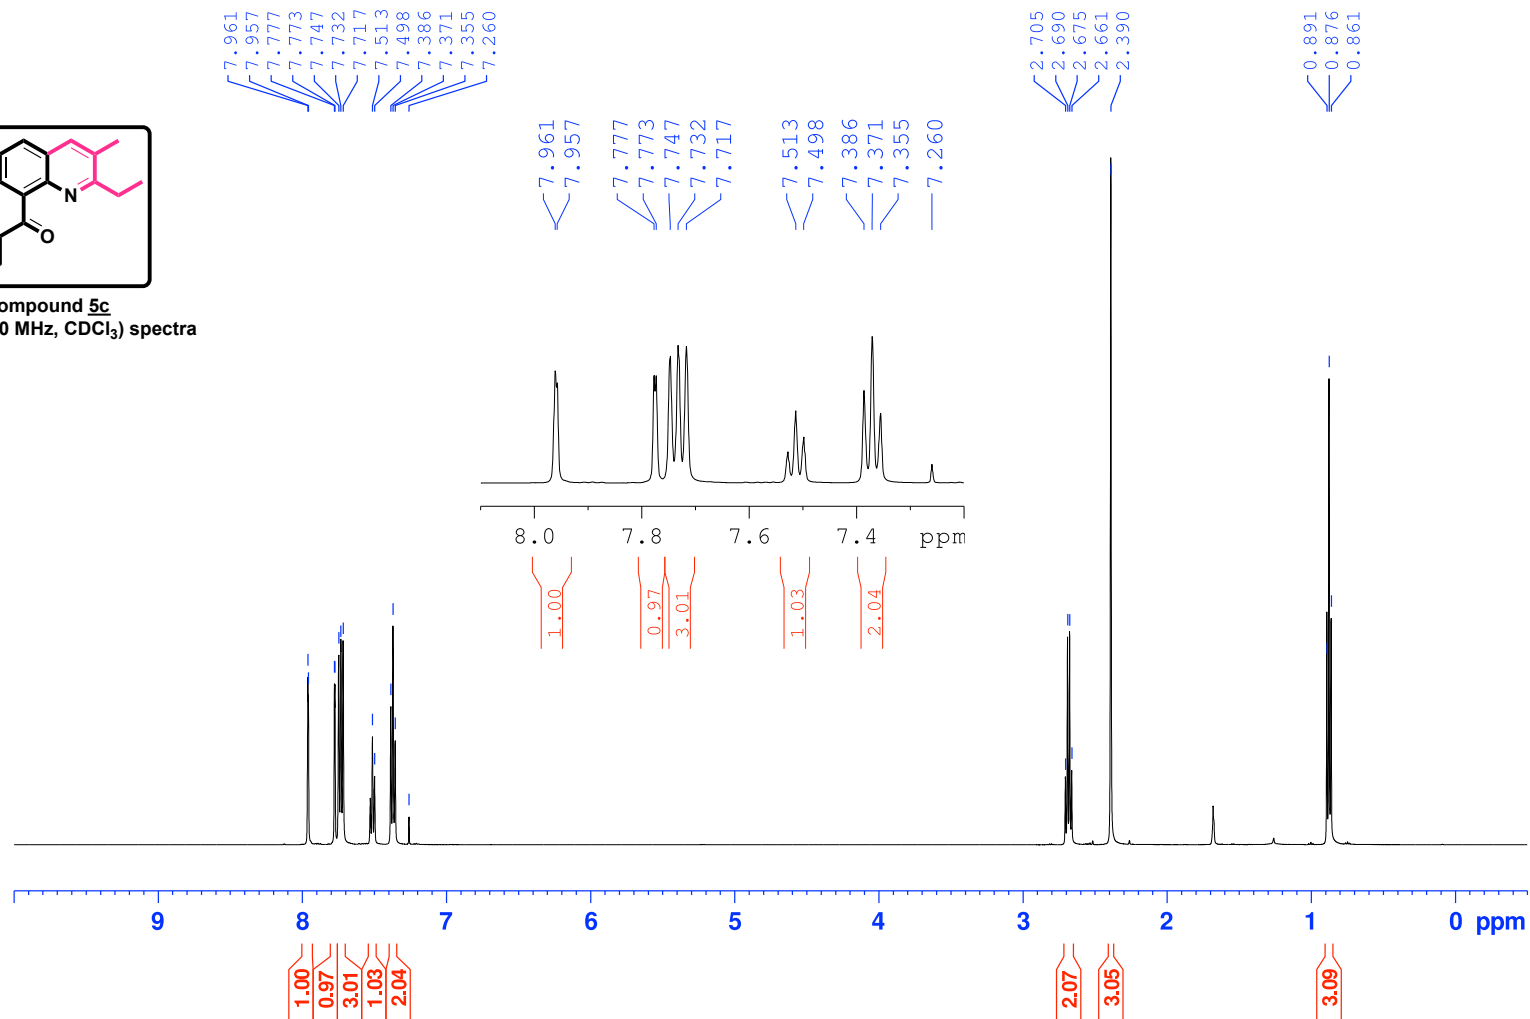



# Compound 5c

13C CKC-721 sep34-35 0929

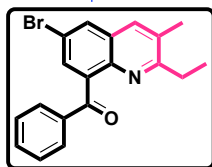

Compound 5c  
13C NMR (125 MHz, CDCl<sub>3</sub>) spectra

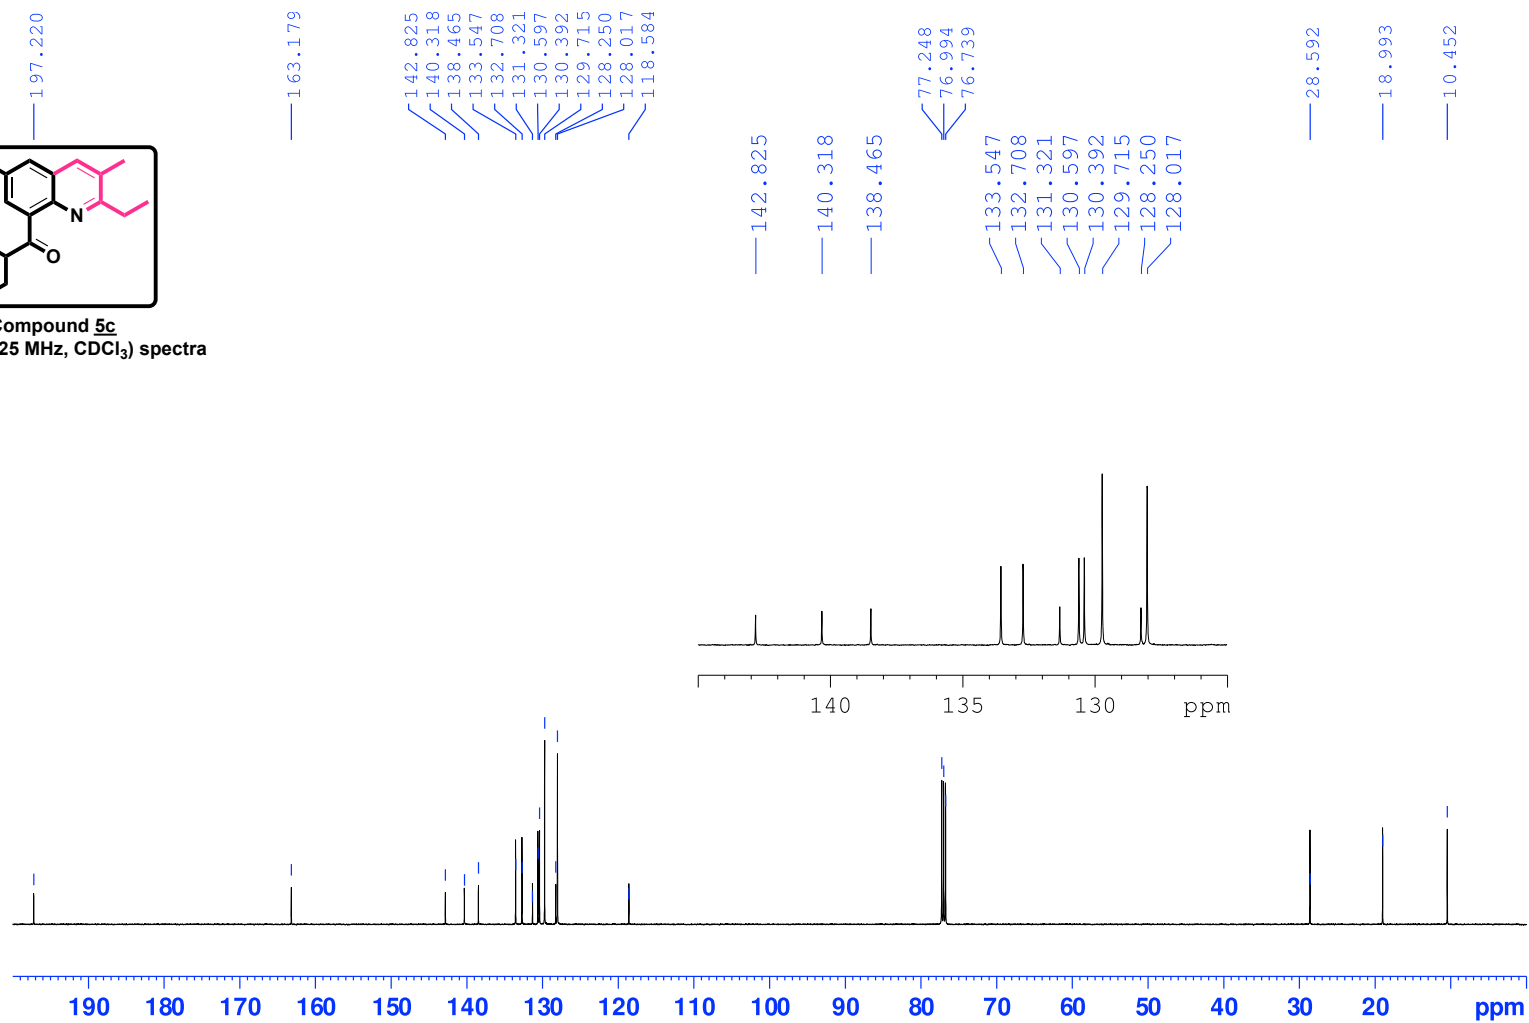

# Compound 5d

1H CKC-723 sep22-23 1005

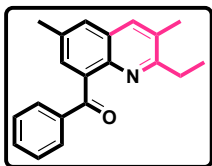

Compound 5d

<sup>1</sup>H NMR (500 MHz, CDCl<sub>3</sub>) spectra

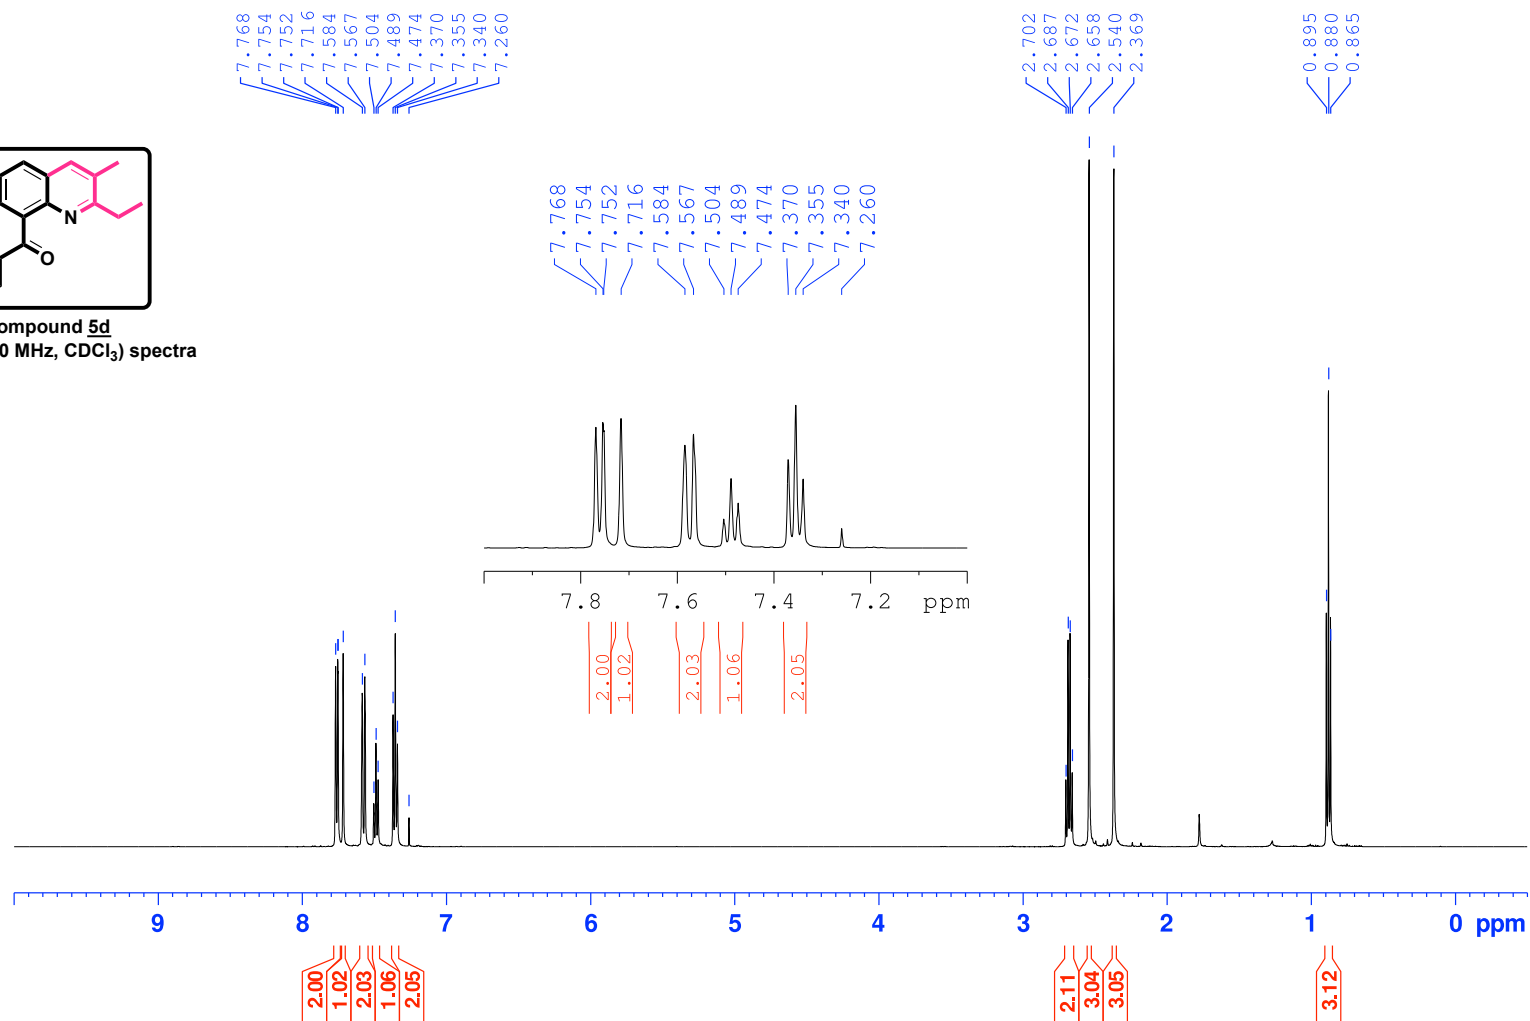

# Compound 5d

13C CKC-723 sep22-23 1005

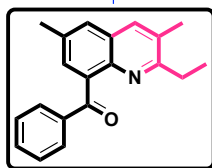

Compound 5d

<sup>13</sup>C NMR (125 MHz, CDCl<sub>3</sub>) spectra

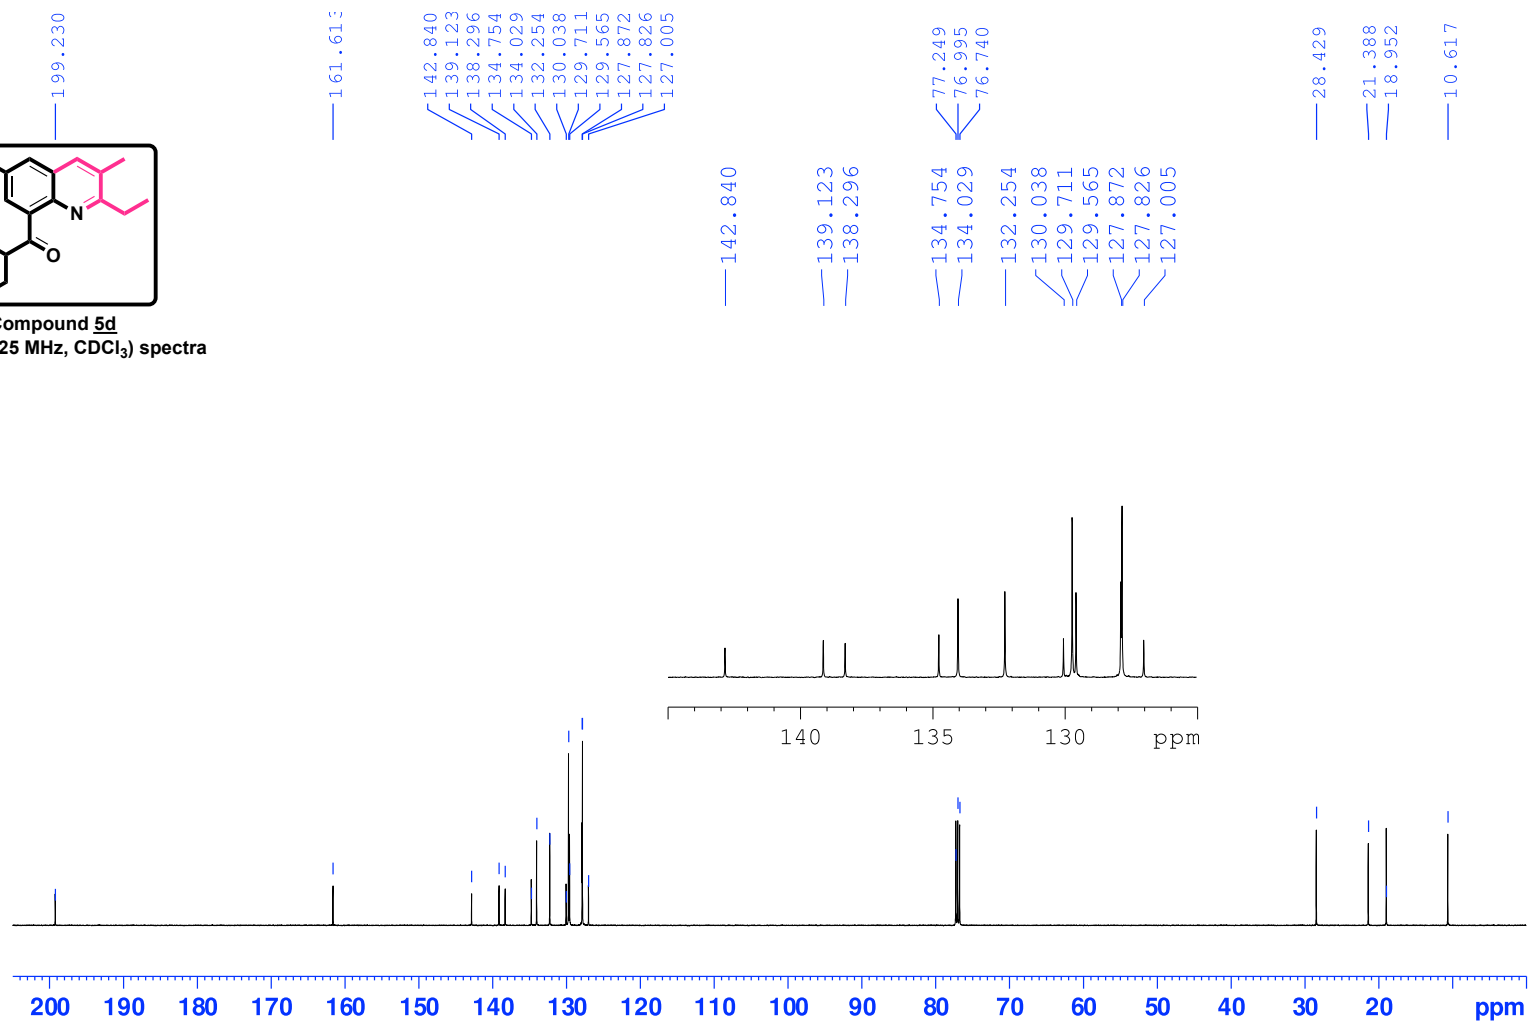

# Compound 5e

1H CKC-733 sep30-31 1007

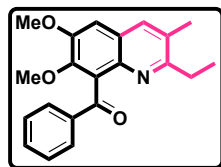

Compound 5e

<sup>1</sup>H NMR (500 MHz, CDCl<sub>3</sub>) spectra

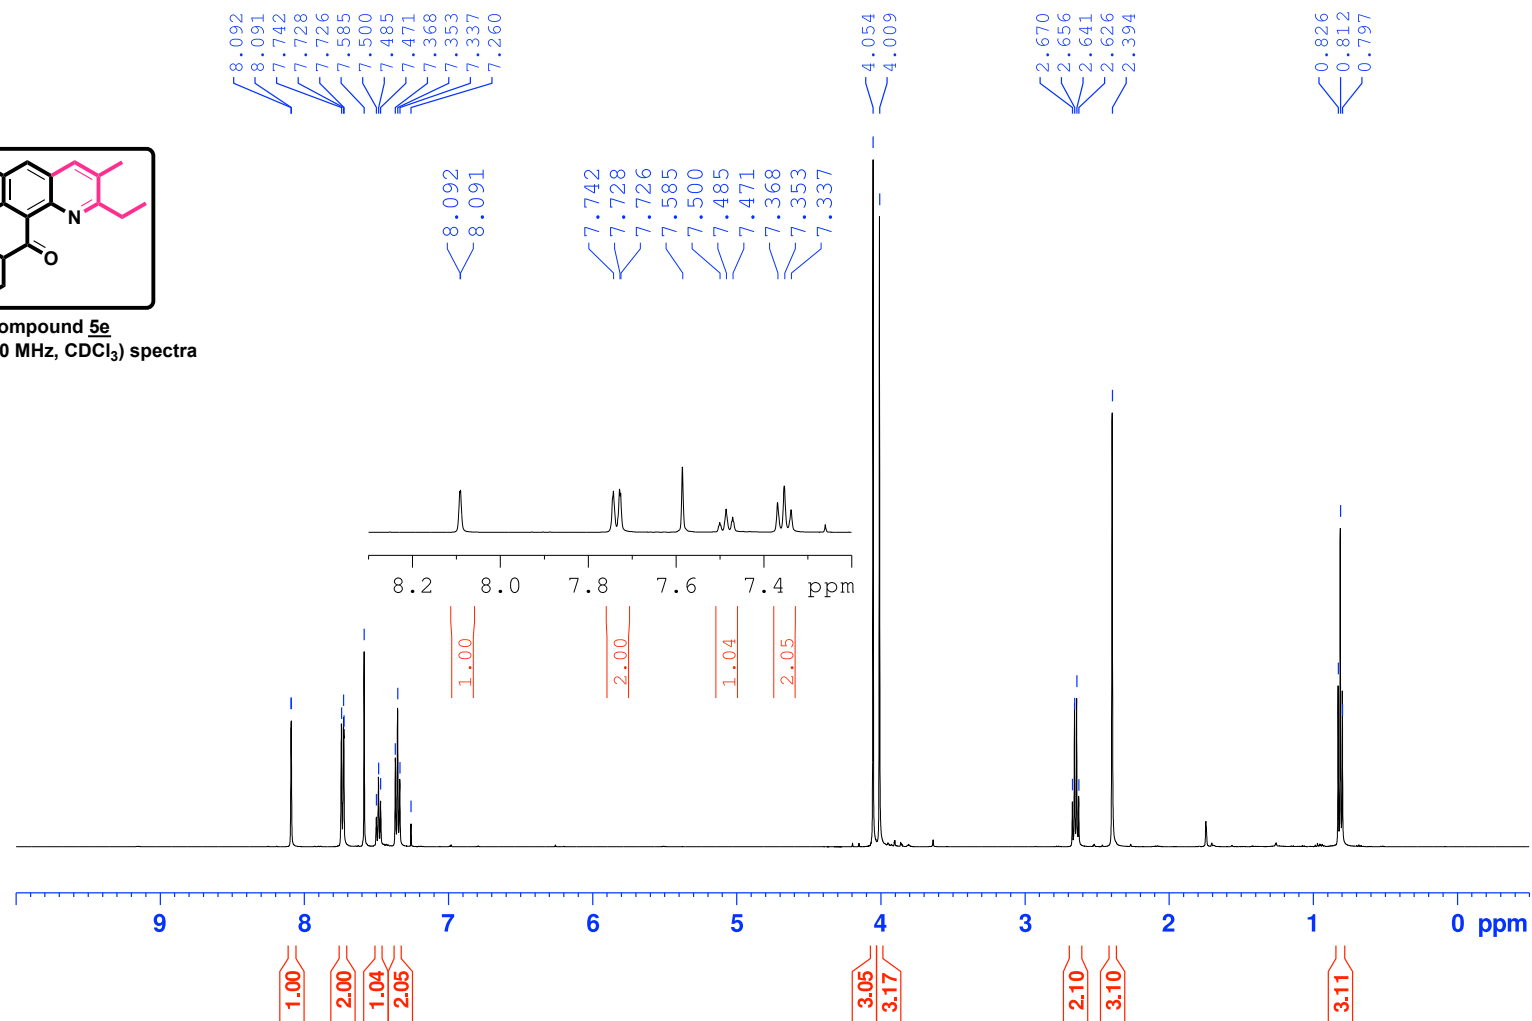

# Compound 5e

13C CKC-733 sep30-31 1007

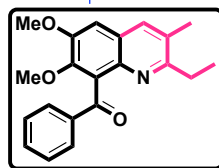

Compound 5e

<sup>13</sup>C NMR (125 MHz, CDCl<sub>3</sub>) spectra

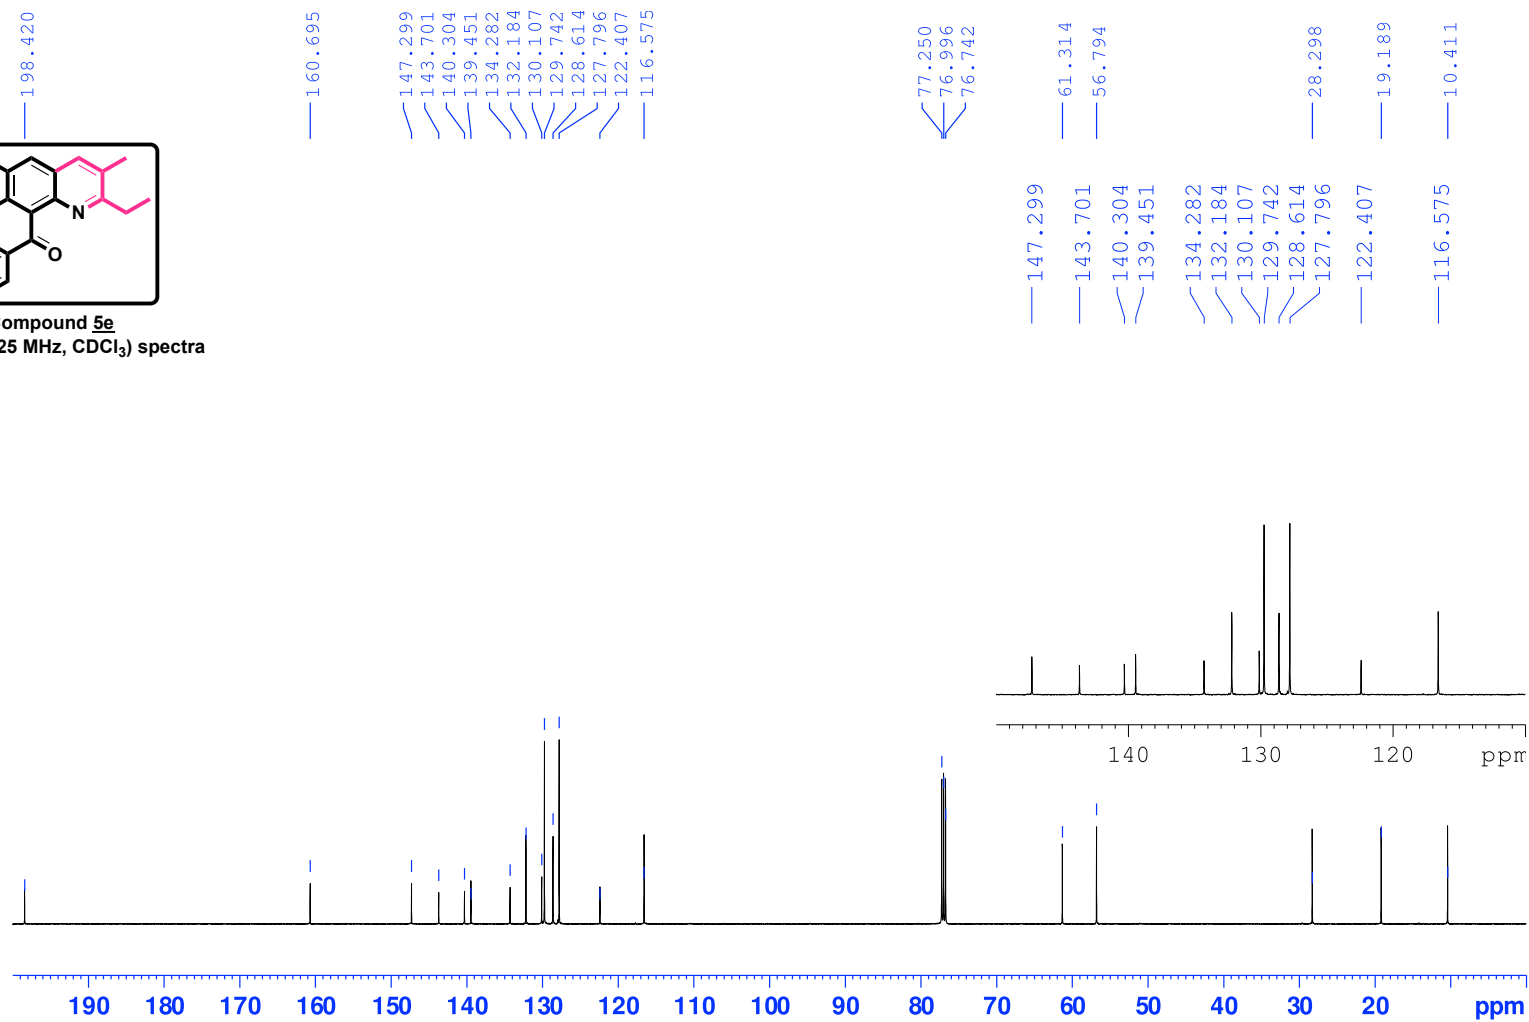

# Compound 5f

1H CKC-725 sep29-30 1020

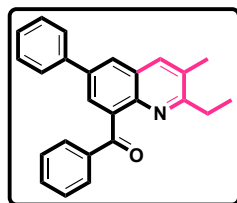

Compound 5f  
<sup>1</sup>H NMR (500 MHz, CDCl<sub>3</sub>) spectra

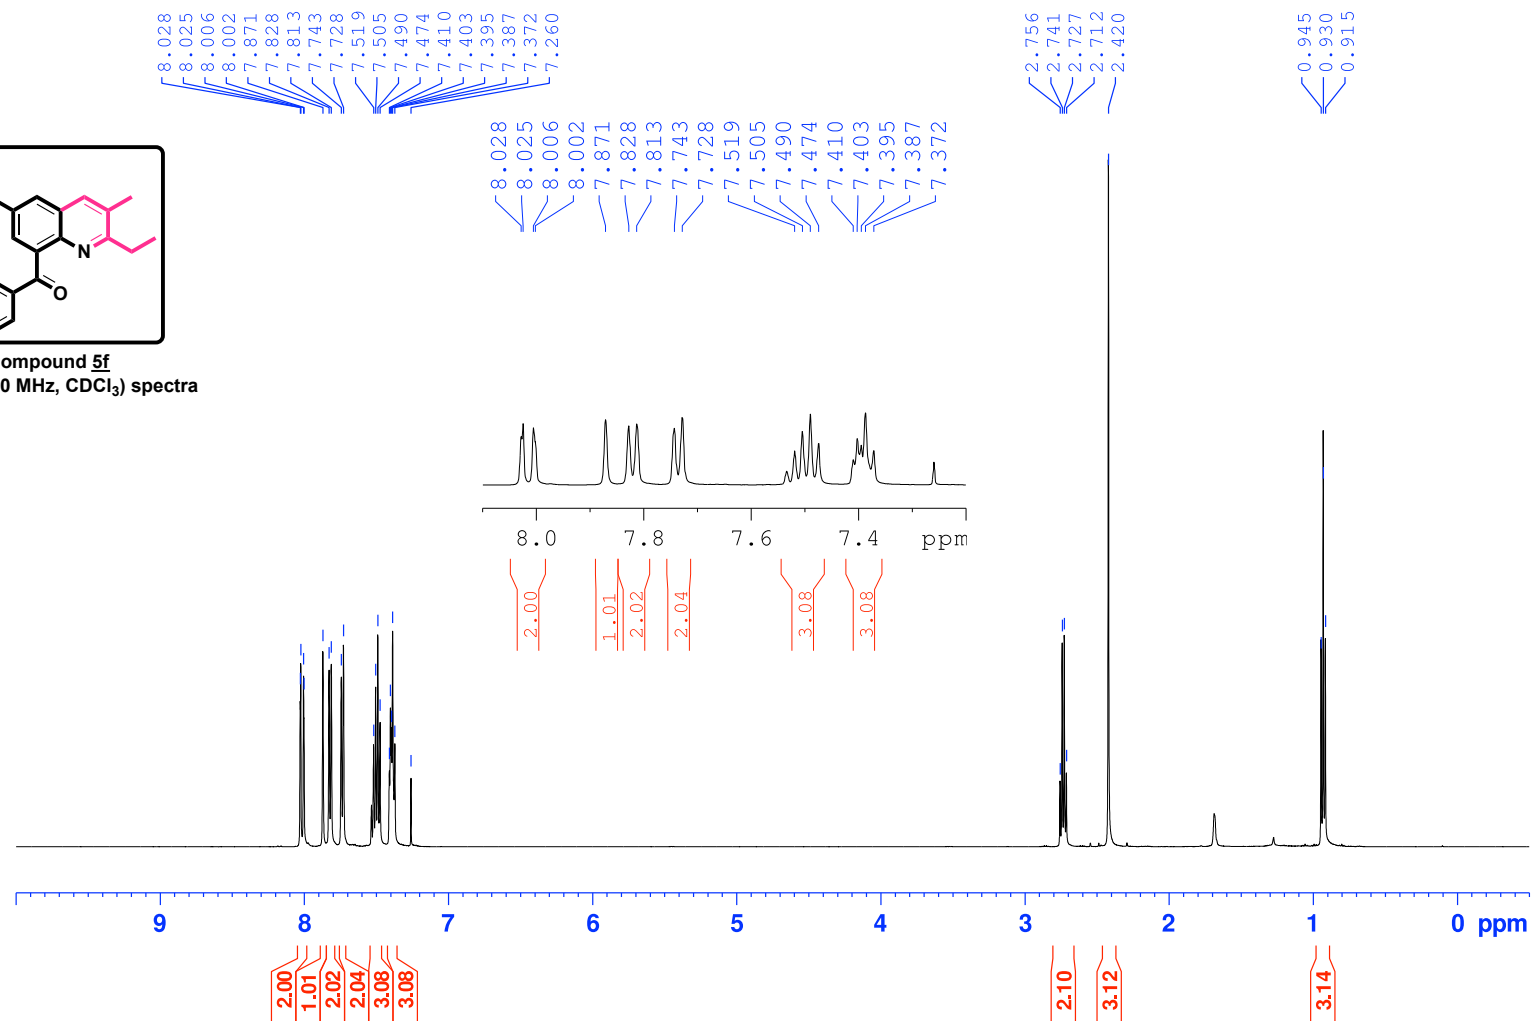

# Compound 5f

13C CKC-725 sep29-30 1020

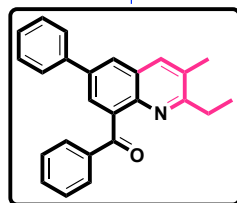

Compound 5f  
<sup>13</sup>C NMR (125 MHz, CDCl<sub>3</sub>) spectra

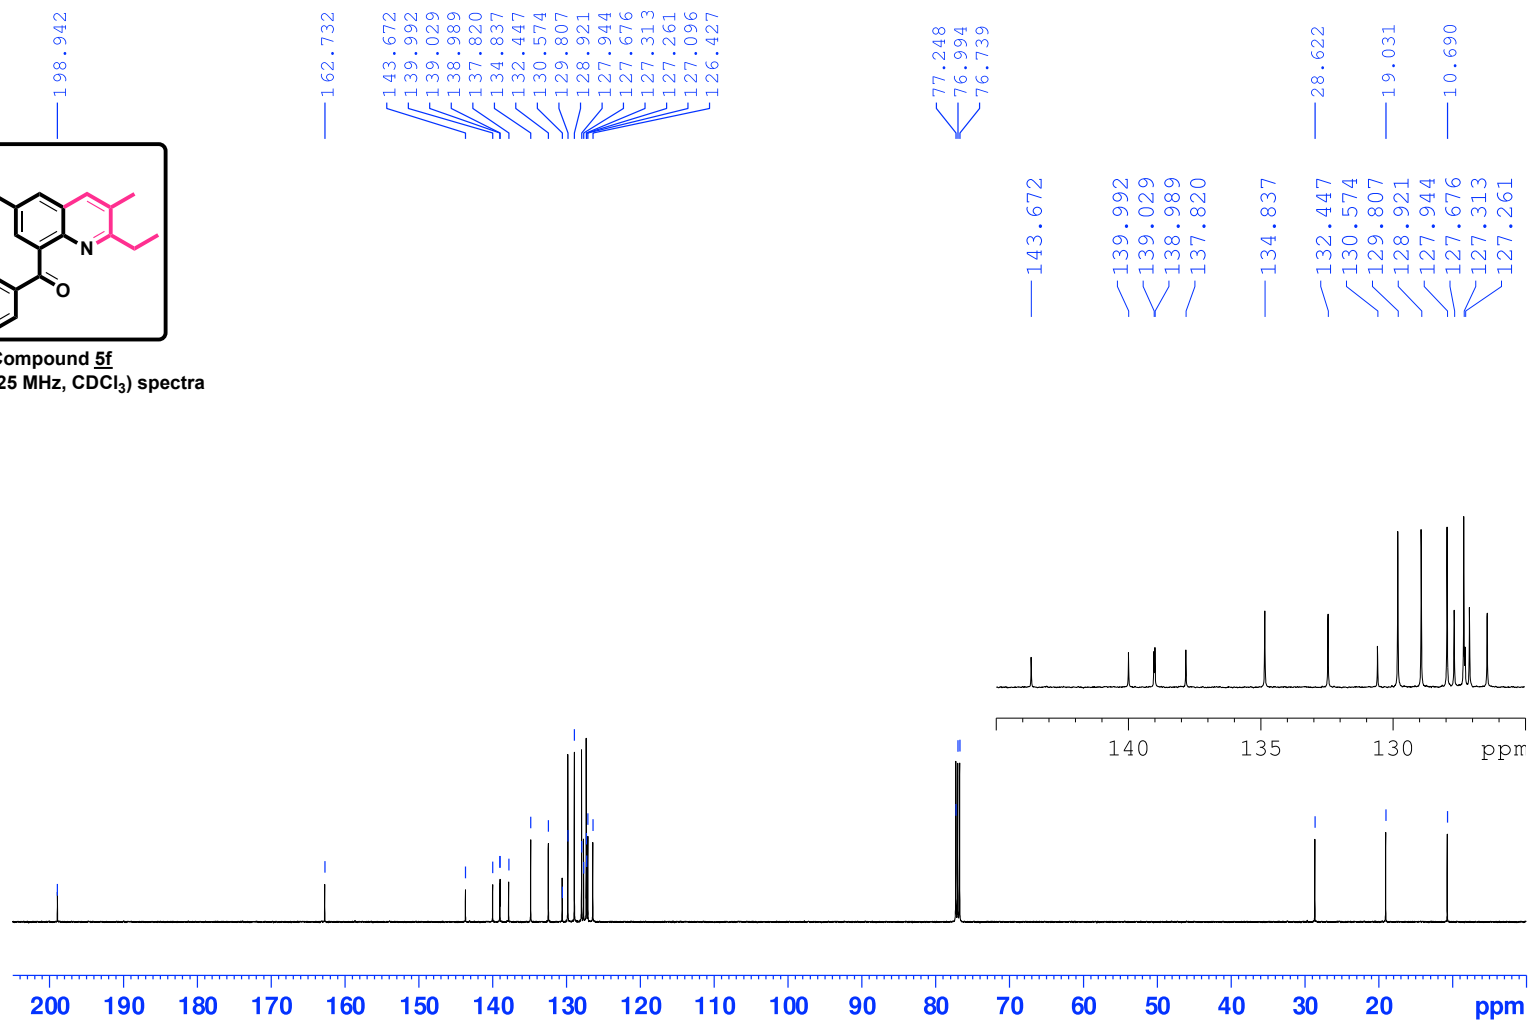

# Compound 5g

1H CKC-726 sep5-6 0930

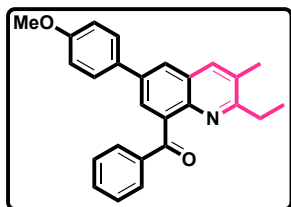

Compound 5g  
<sup>1</sup>H NMR (500 MHz, CDCl<sub>3</sub>) spectra

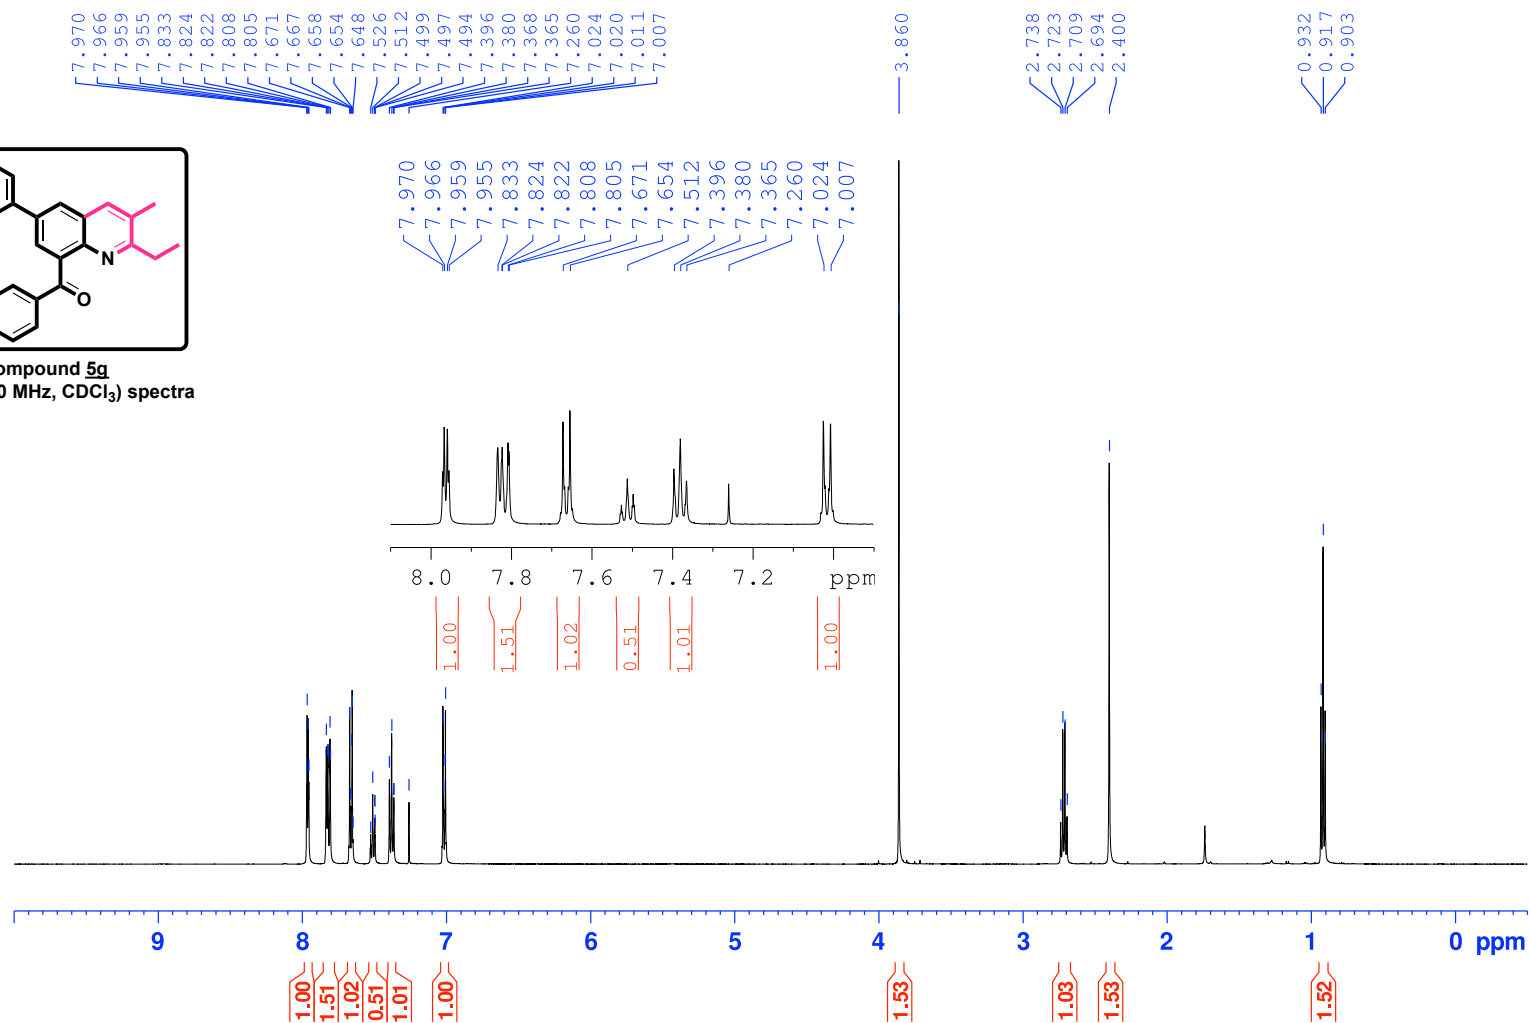



# Compound 5g

13C CKC-726 sep5-6 0930

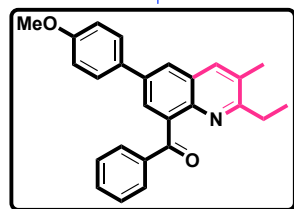

Compound 5g

<sup>13</sup>C NMR (125 MHz, CDCl<sub>3</sub>) spectra

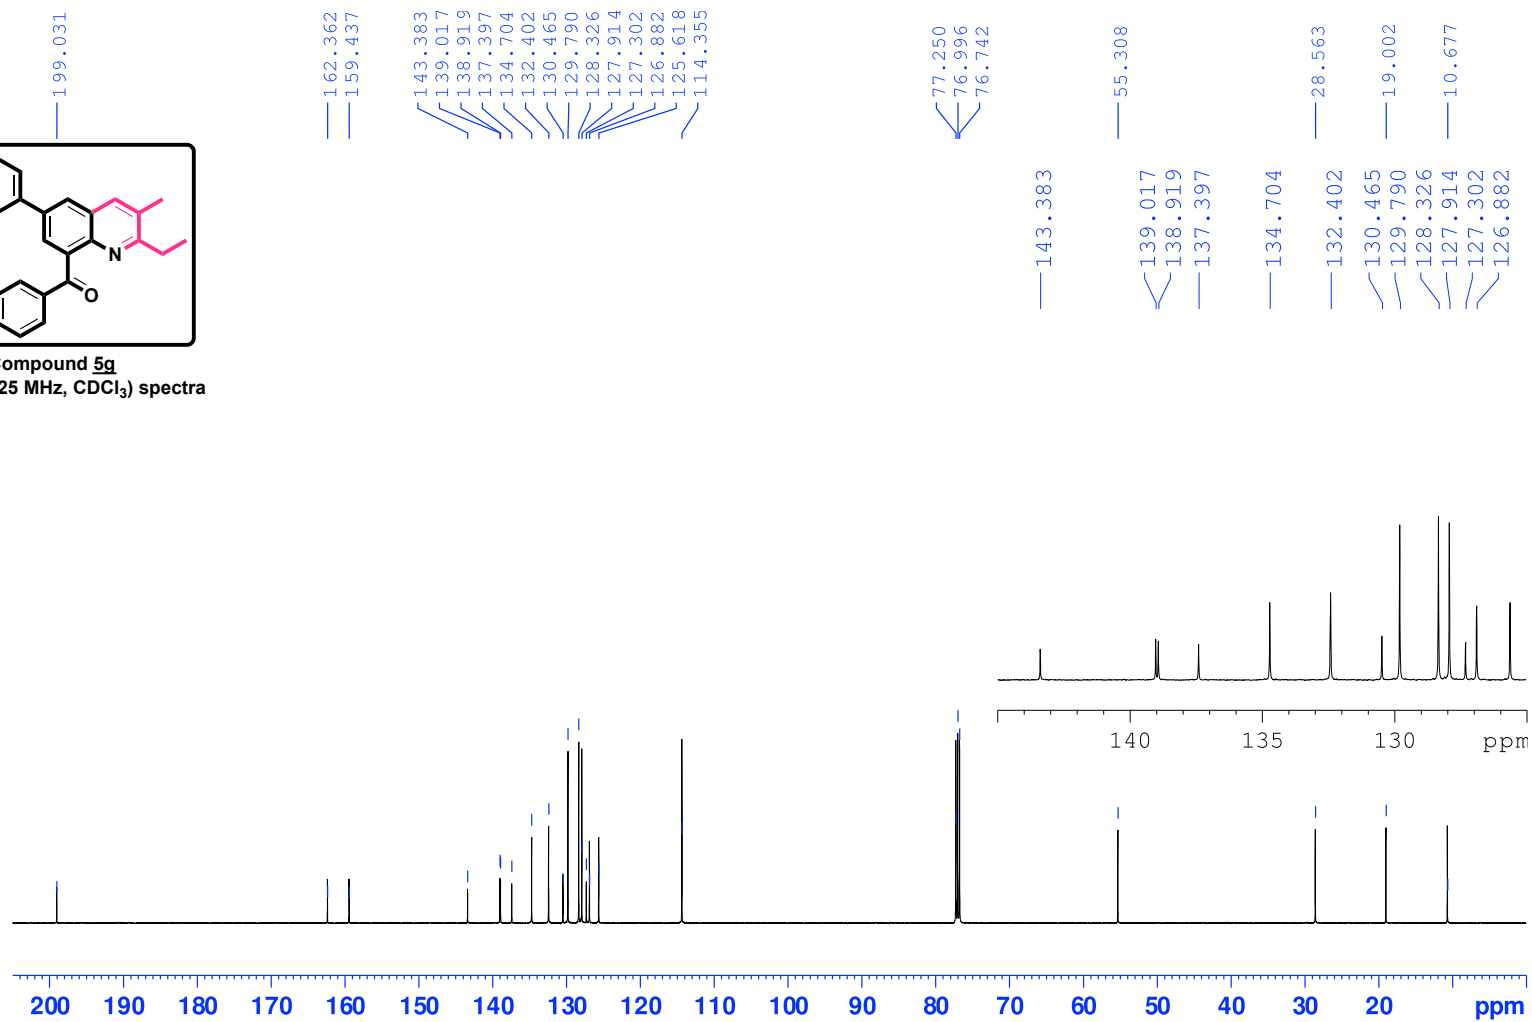

# Compound 5h

1H CKC-739 sep22-23 1005

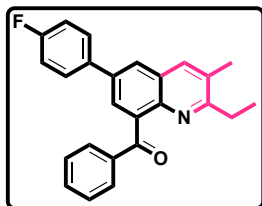

Compound **5h**  
<sup>1</sup>H NMR (500 MHz, CDCl<sub>3</sub>) spectra

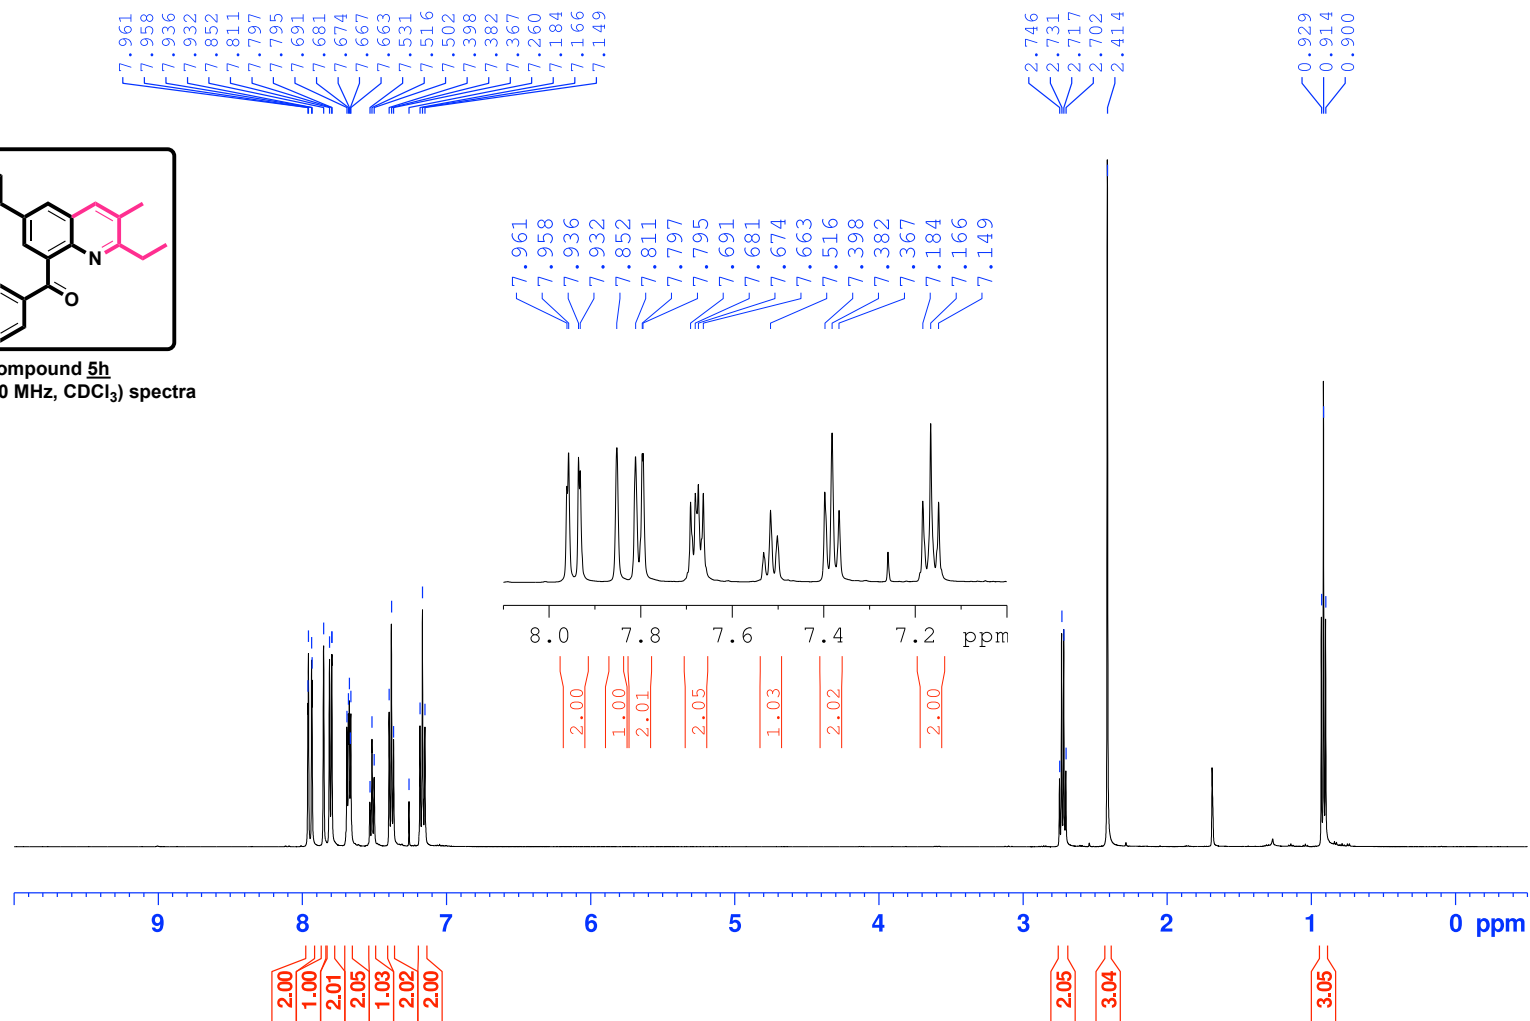

# Compound 5h

13C CKC-739 sep22-23 1005

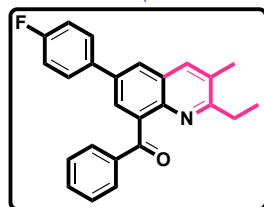

Compound **5h**

<sup>13</sup>C NMR (125 MHz, CDCl<sub>3</sub>) spectra

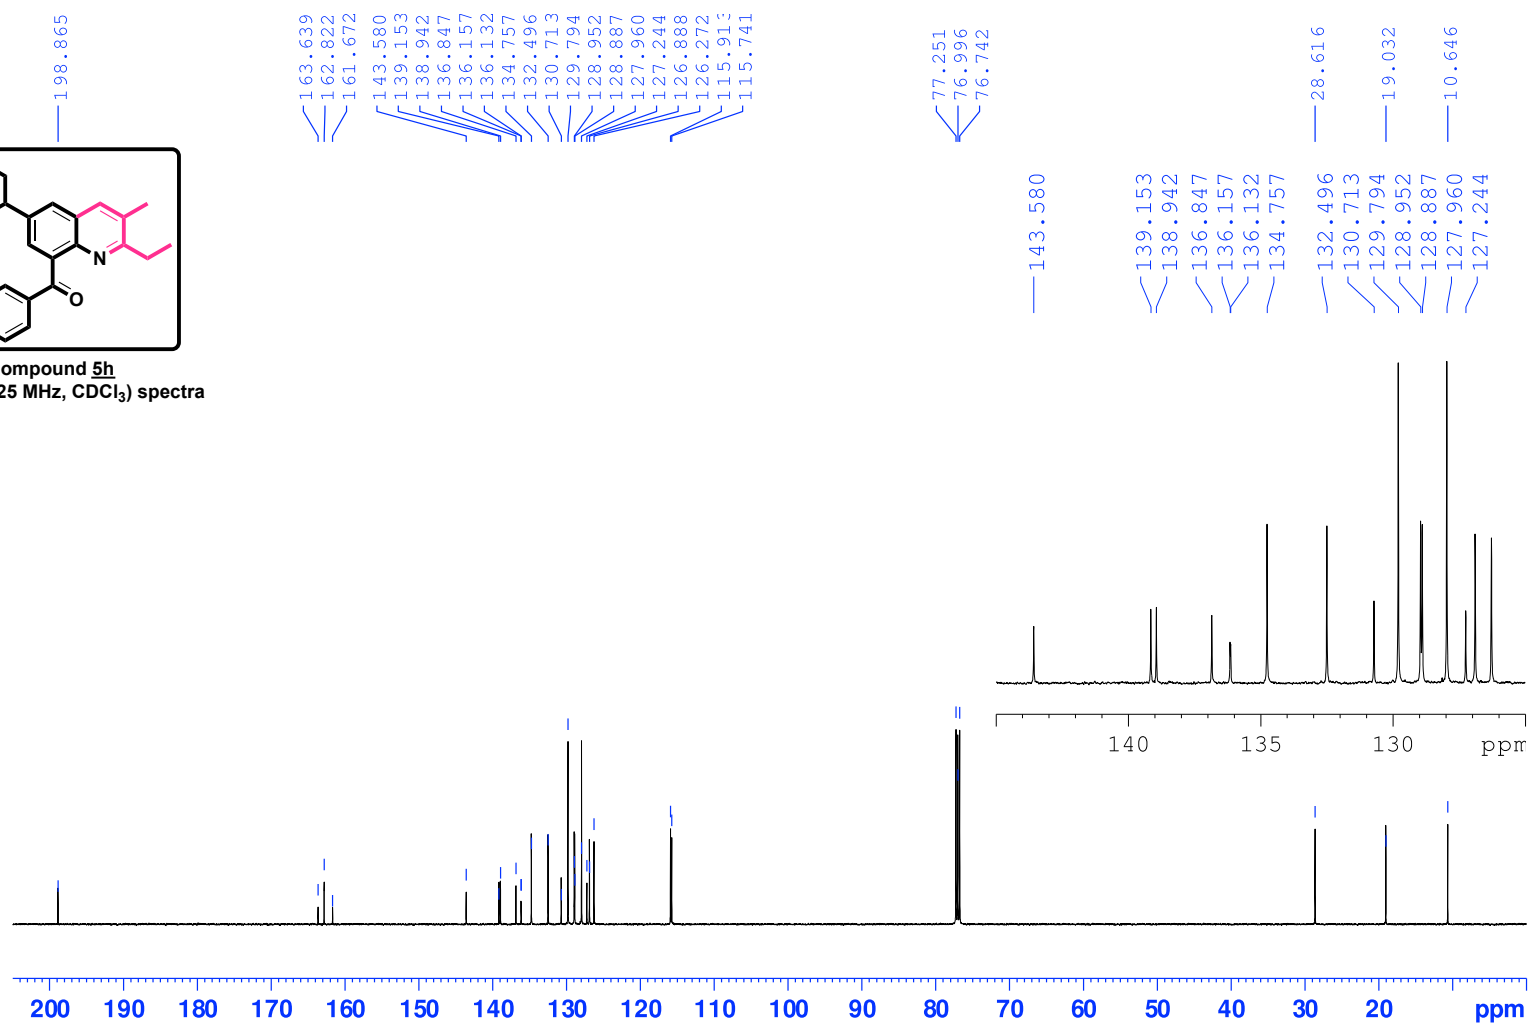

# Compound 5i

1H CKC-727 sep25-26 1008

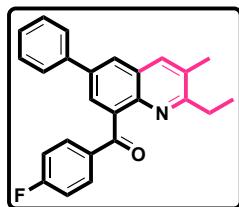

Compound **5i**  
<sup>1</sup>H NMR (500 MHz, CDCl<sub>3</sub>) spectra

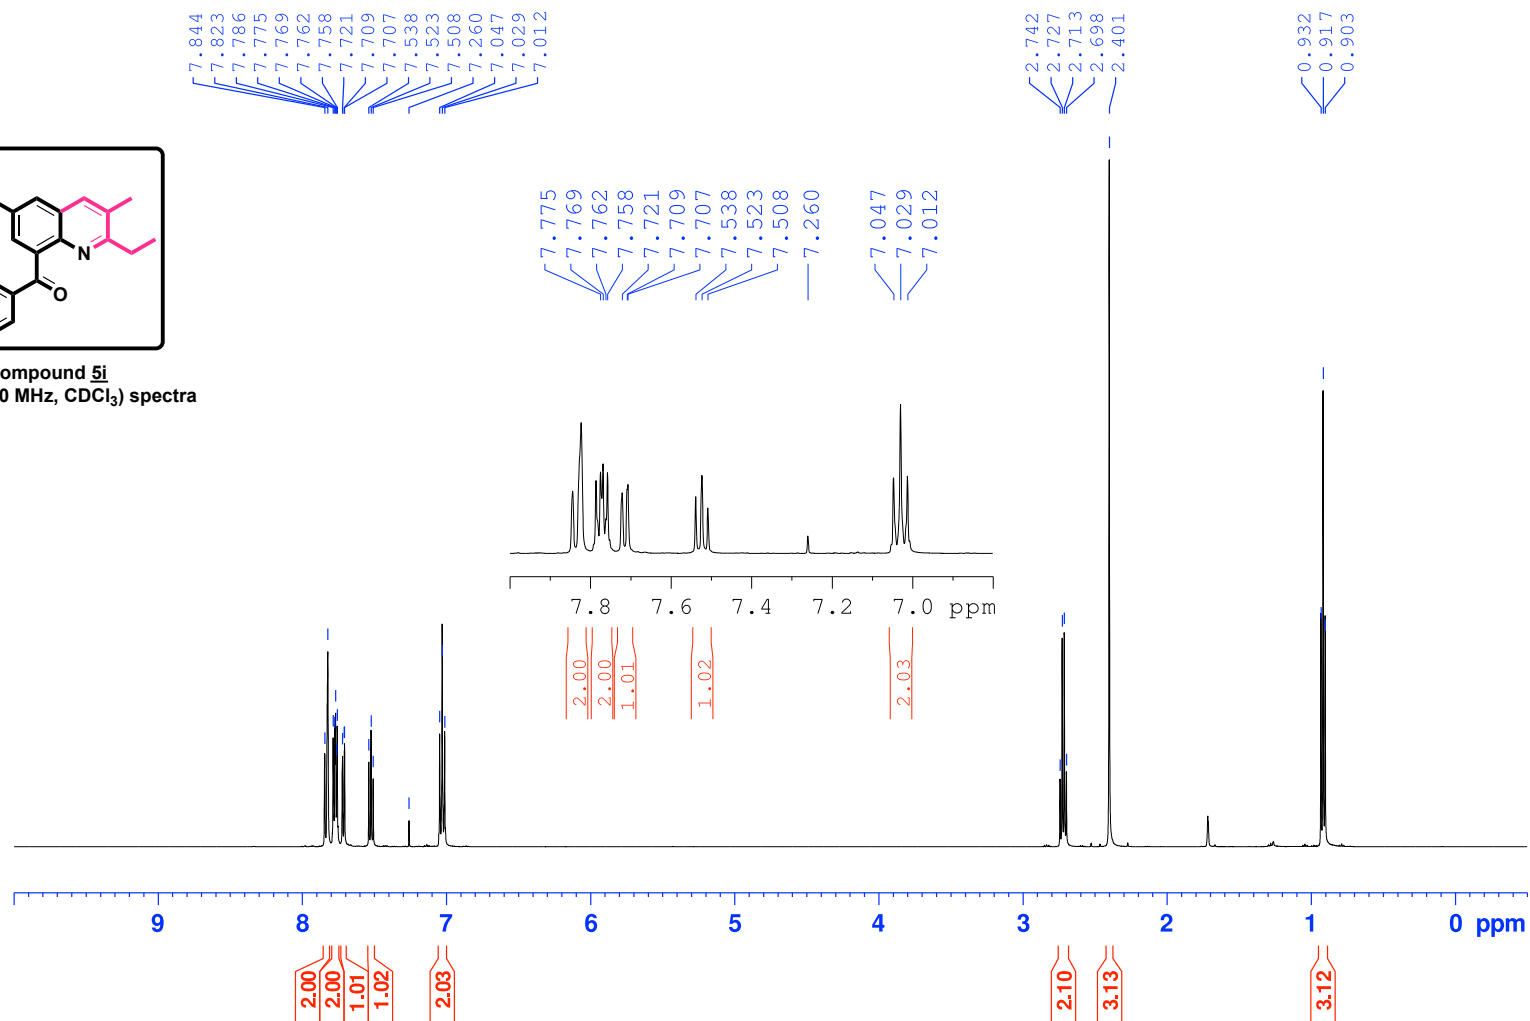

# Compound 5i

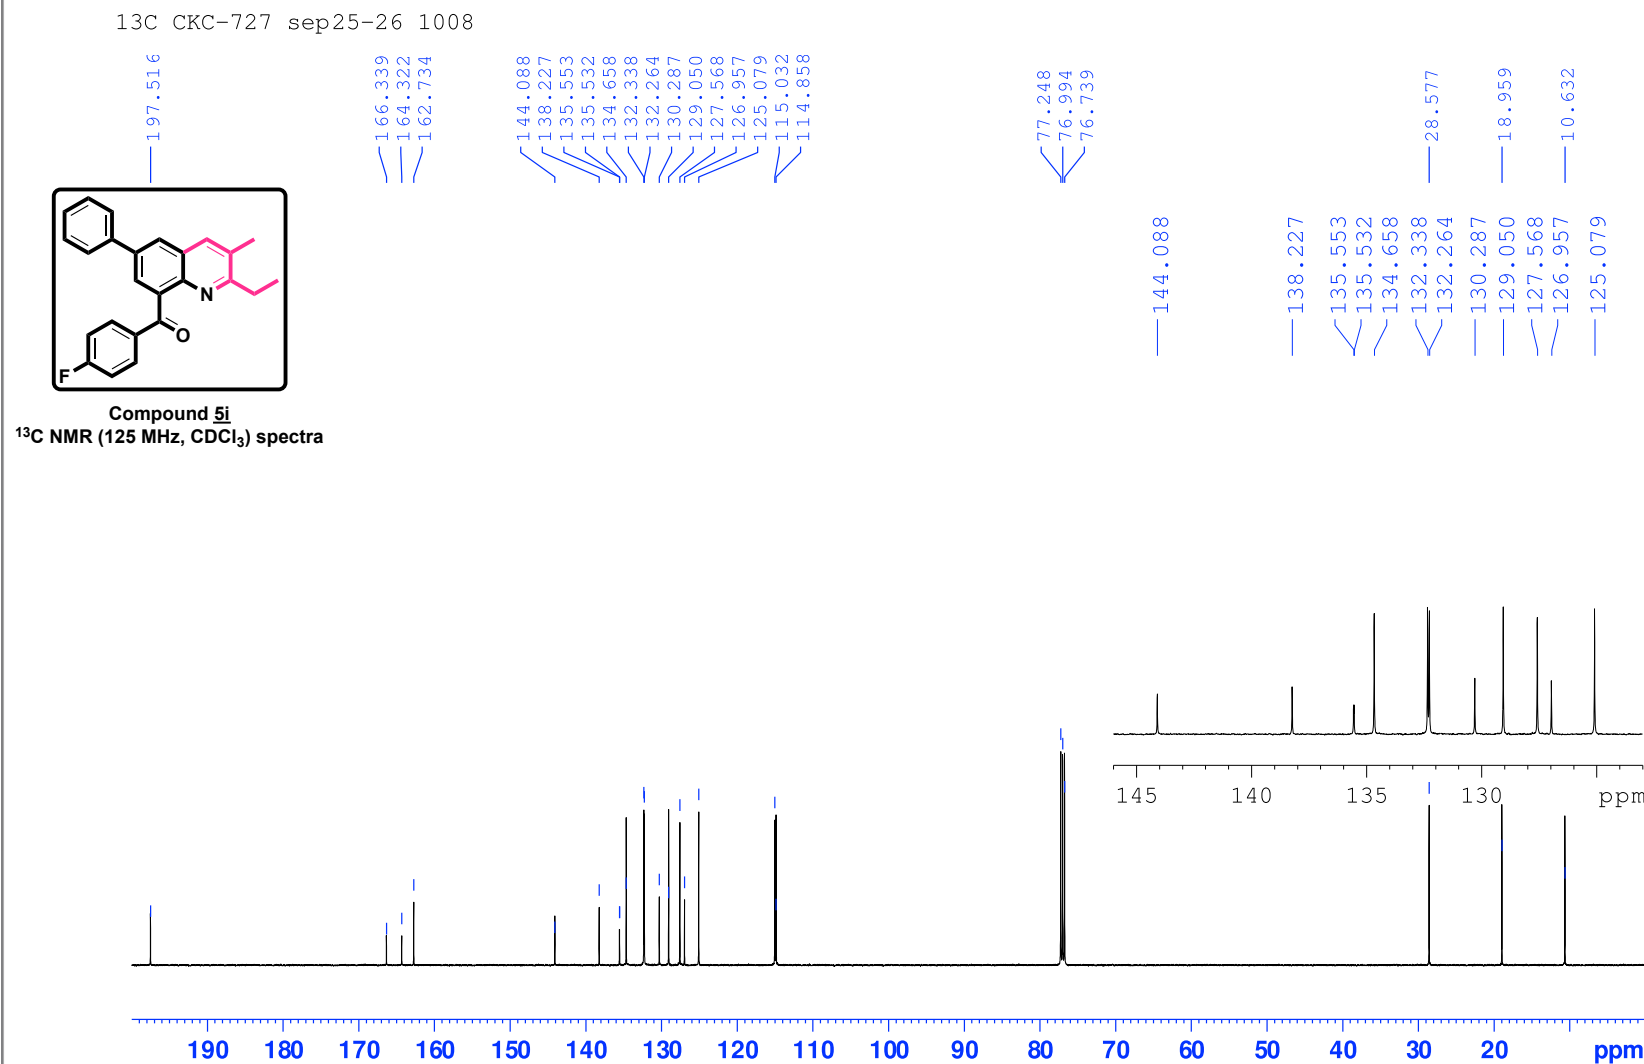

# Compound 5j

1H CKC-728 sep23-24 1012

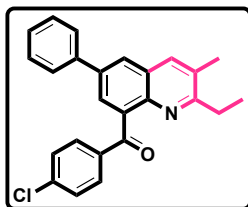

Compound **5j**  
<sup>1</sup>H NMR (500 MHz, CDCl<sub>3</sub>) spectra

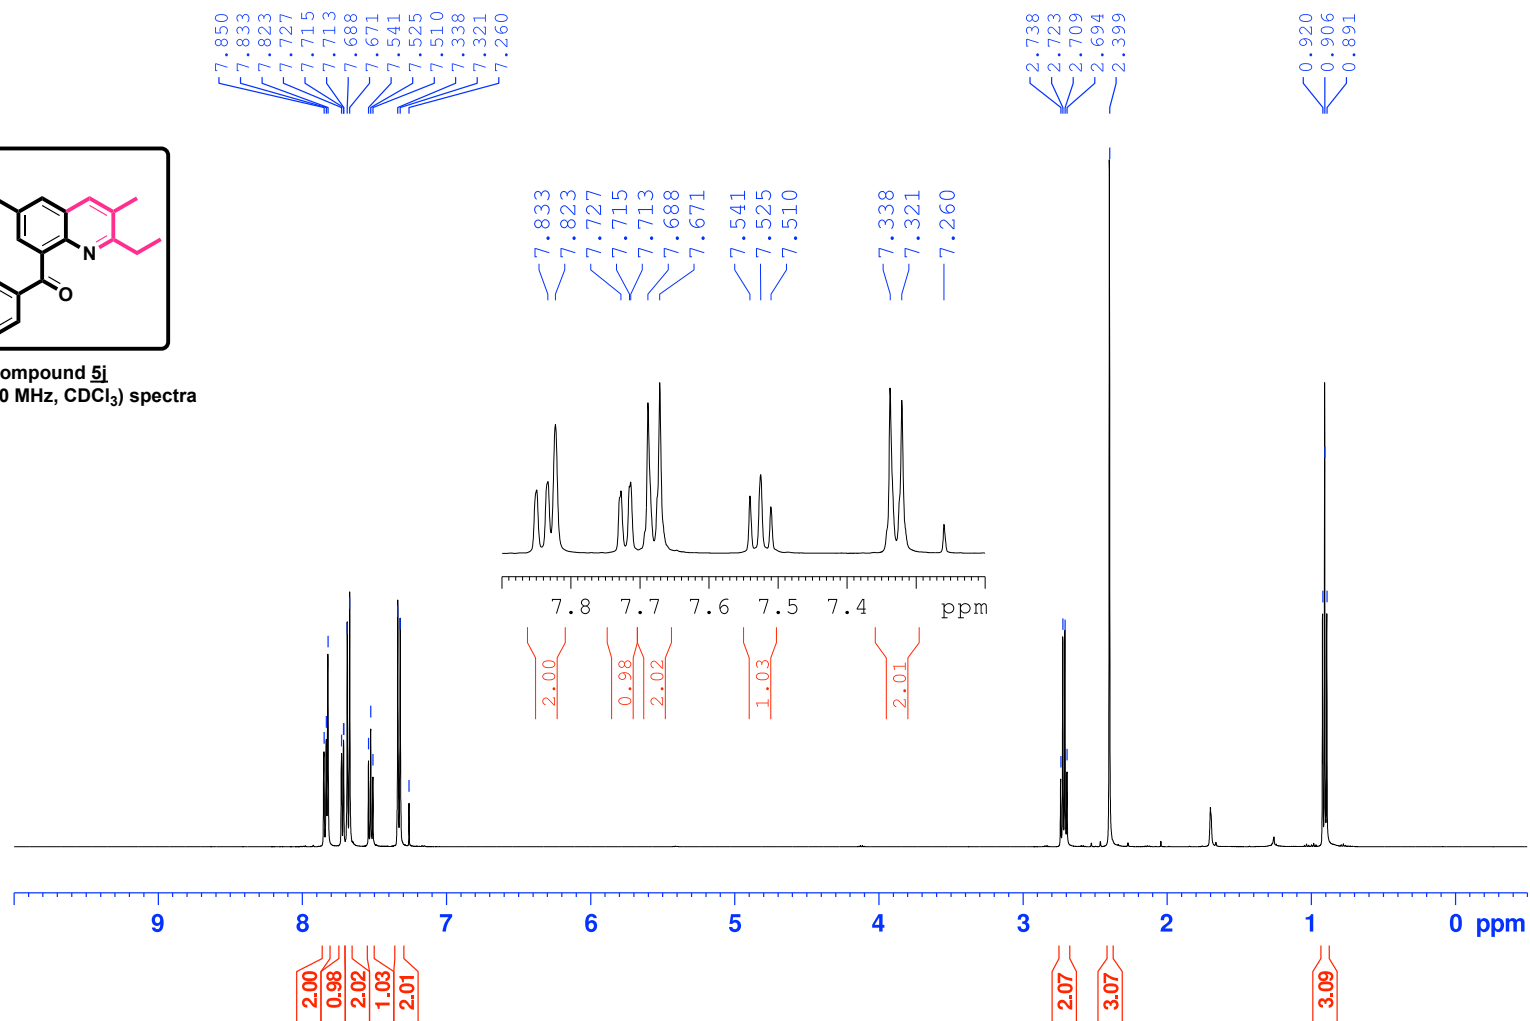

# Compound 5j

13C CKC-728 sep23-24 1012

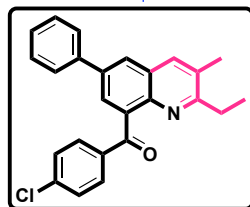

Compound 5j  
<sup>13</sup>C NMR (125 MHz, CDCl<sub>3</sub>) spectra

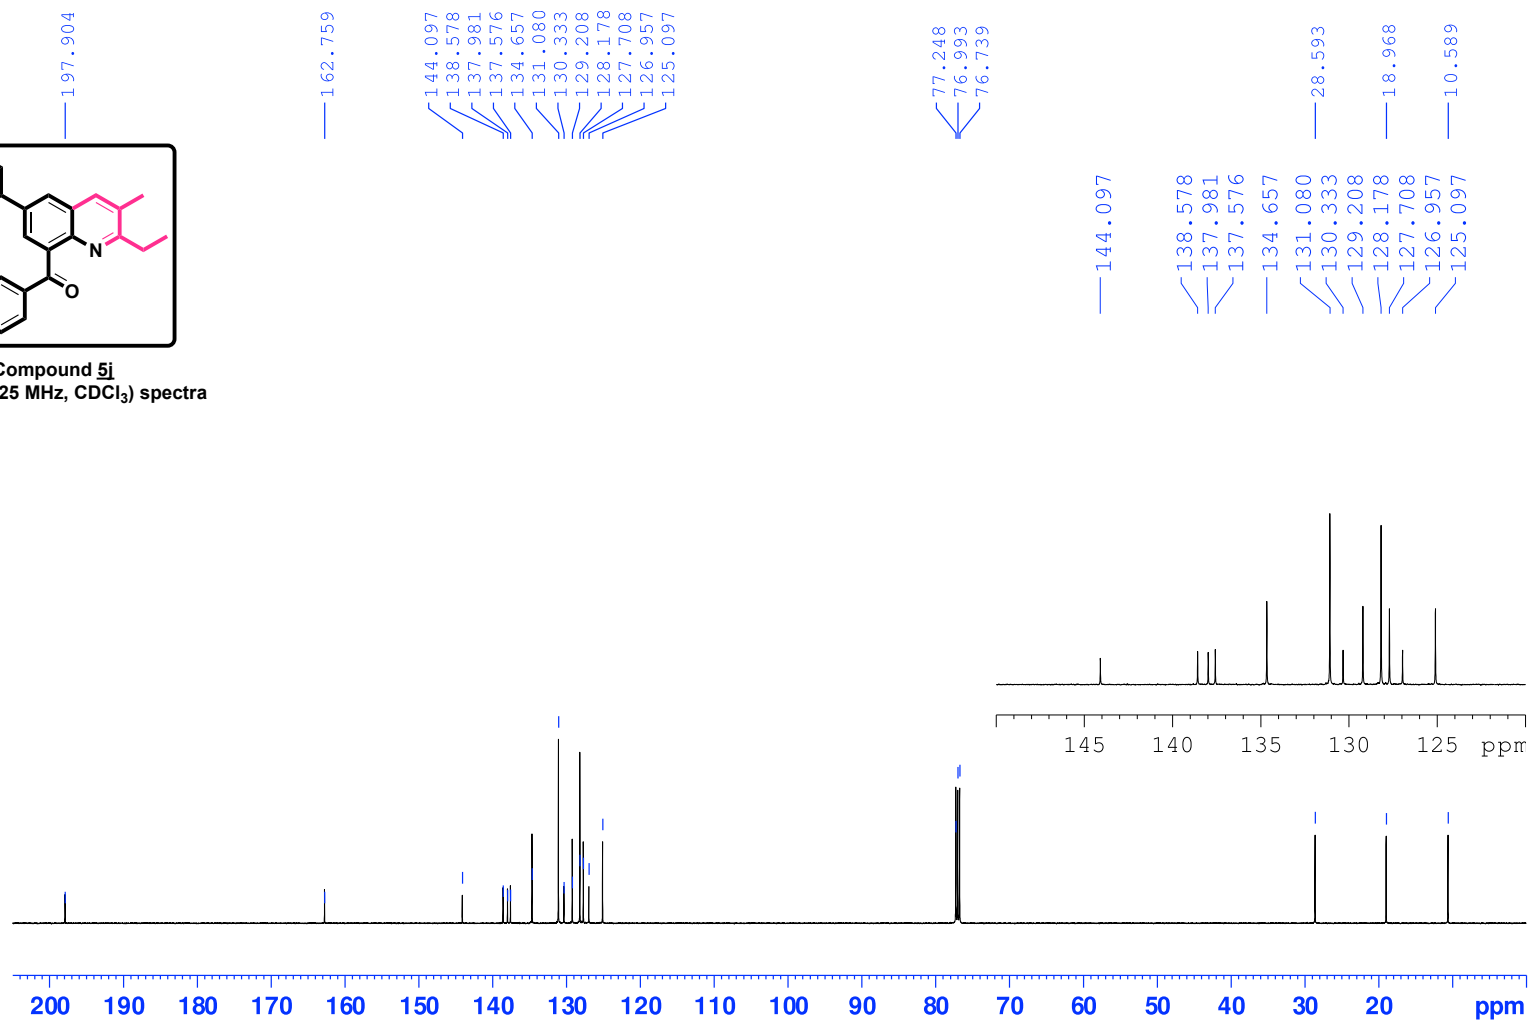

# Compound 5k

1H CKC-729 sep41-42 1012

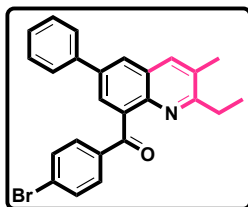

Compound **5k**  
<sup>1</sup>H NMR (500 MHz, CDCl<sub>3</sub>) spectra

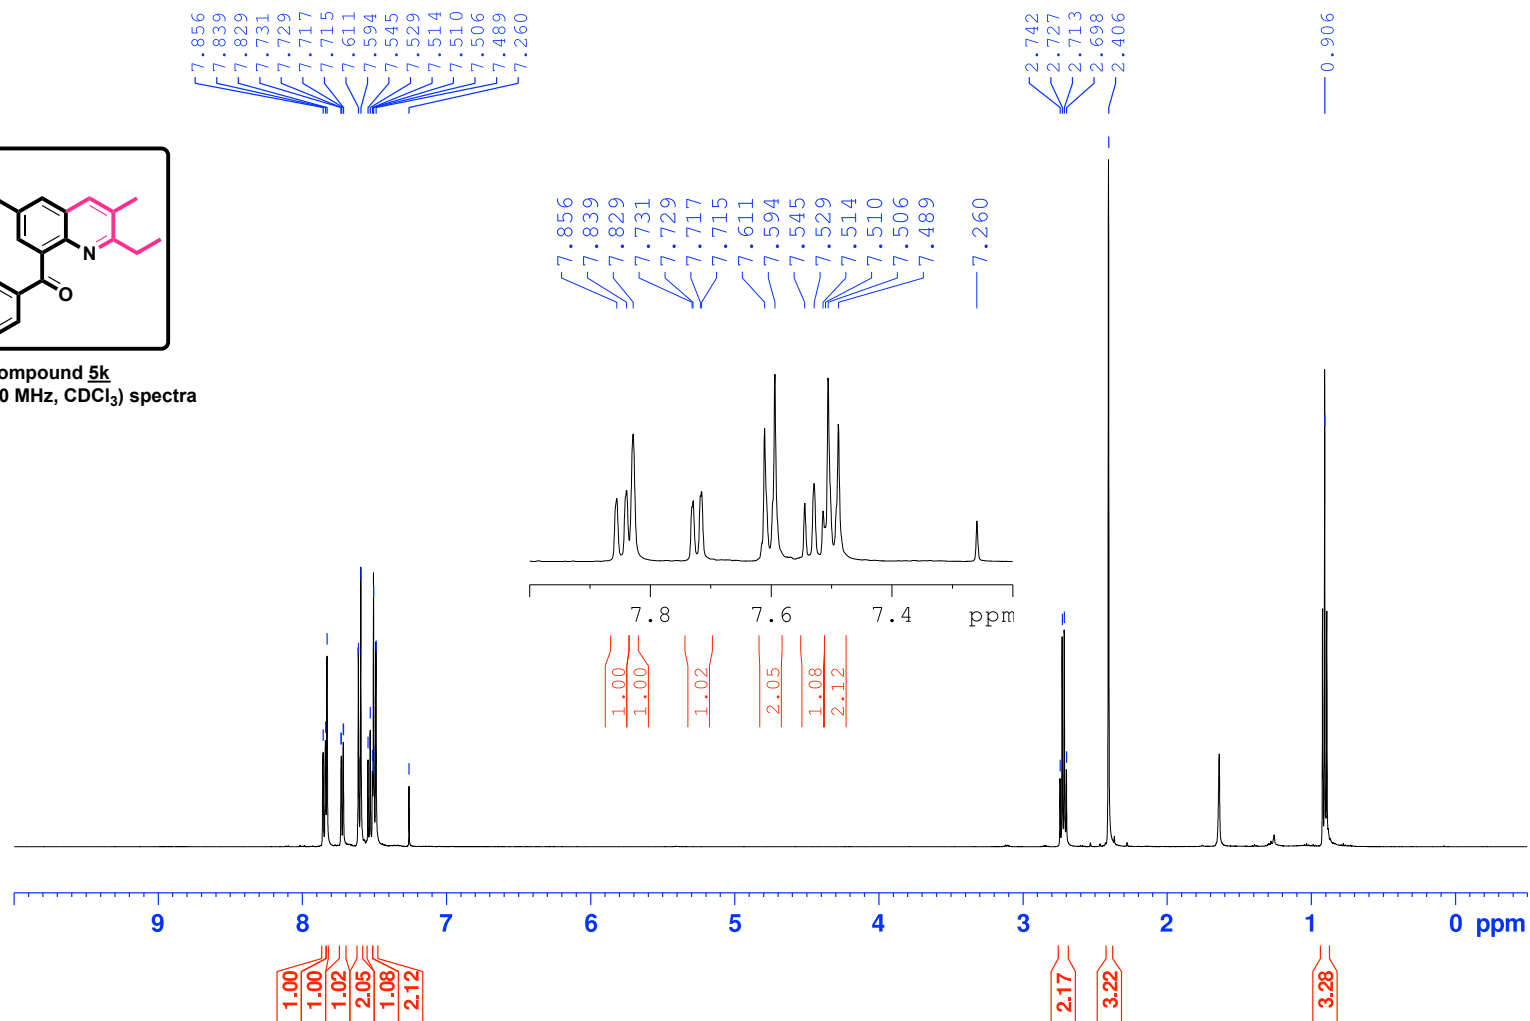



# Compound 5k

13C CKC-729 sep41-42 1012

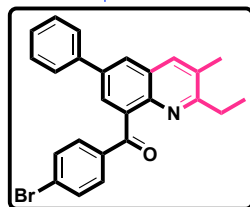

Compound **5k**  
<sup>13</sup>C NMR (125 MHz, CDCl<sub>3</sub>) spectra

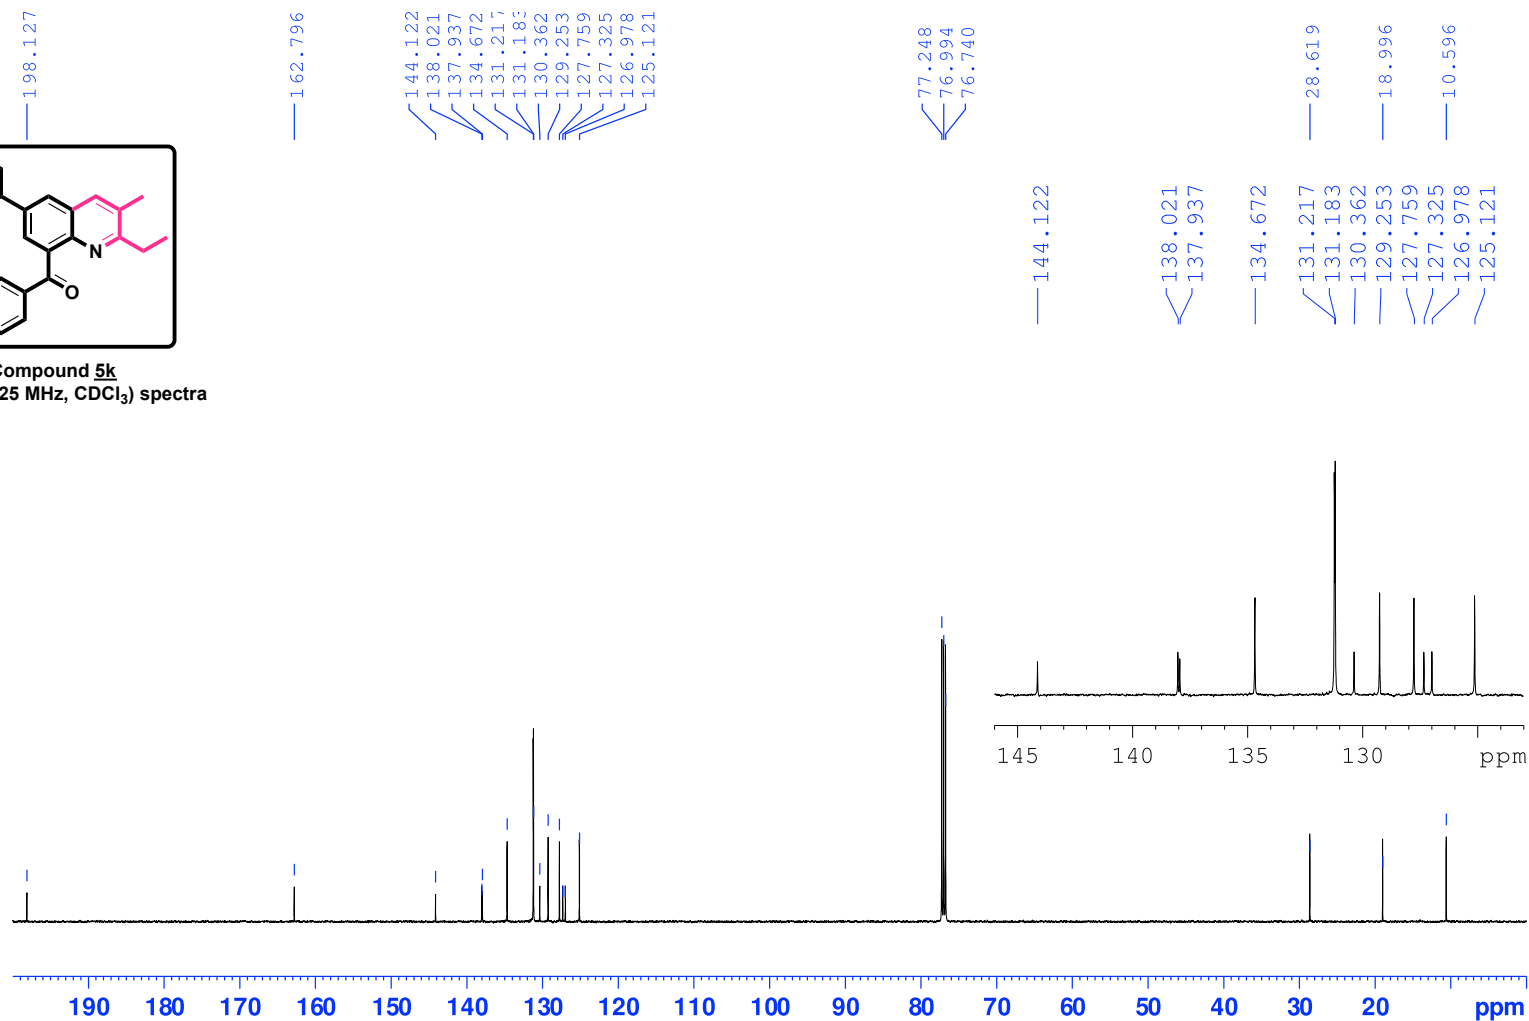

# Compound 5l

1H CKC-730 sep48-49 1013

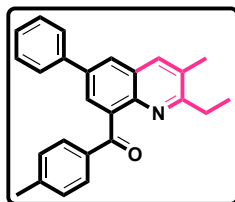

Compound 5l  
<sup>1</sup>H NMR (500 MHz, CDCl<sub>3</sub>) spectra

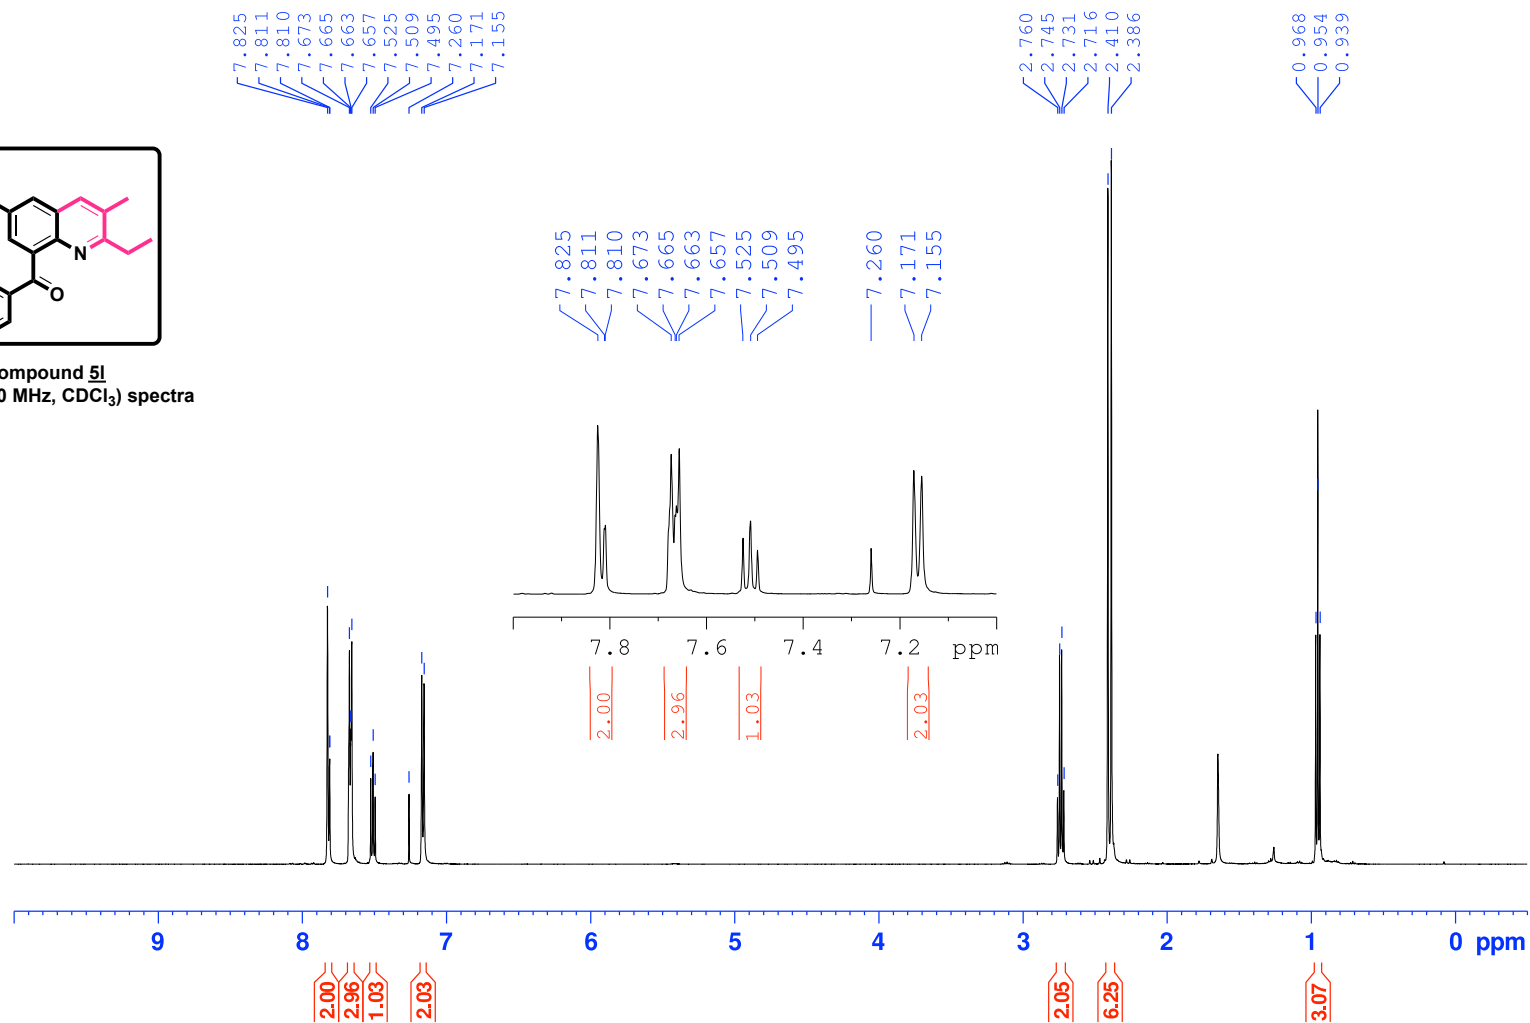

# Compound 5l

13C CKC-730 sep48-49 1013

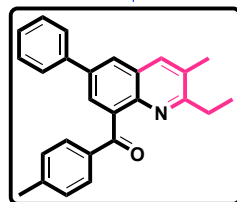

Compound 5l  
<sup>13</sup>C NMR (125 MHz, CDCl<sub>3</sub>) spectra

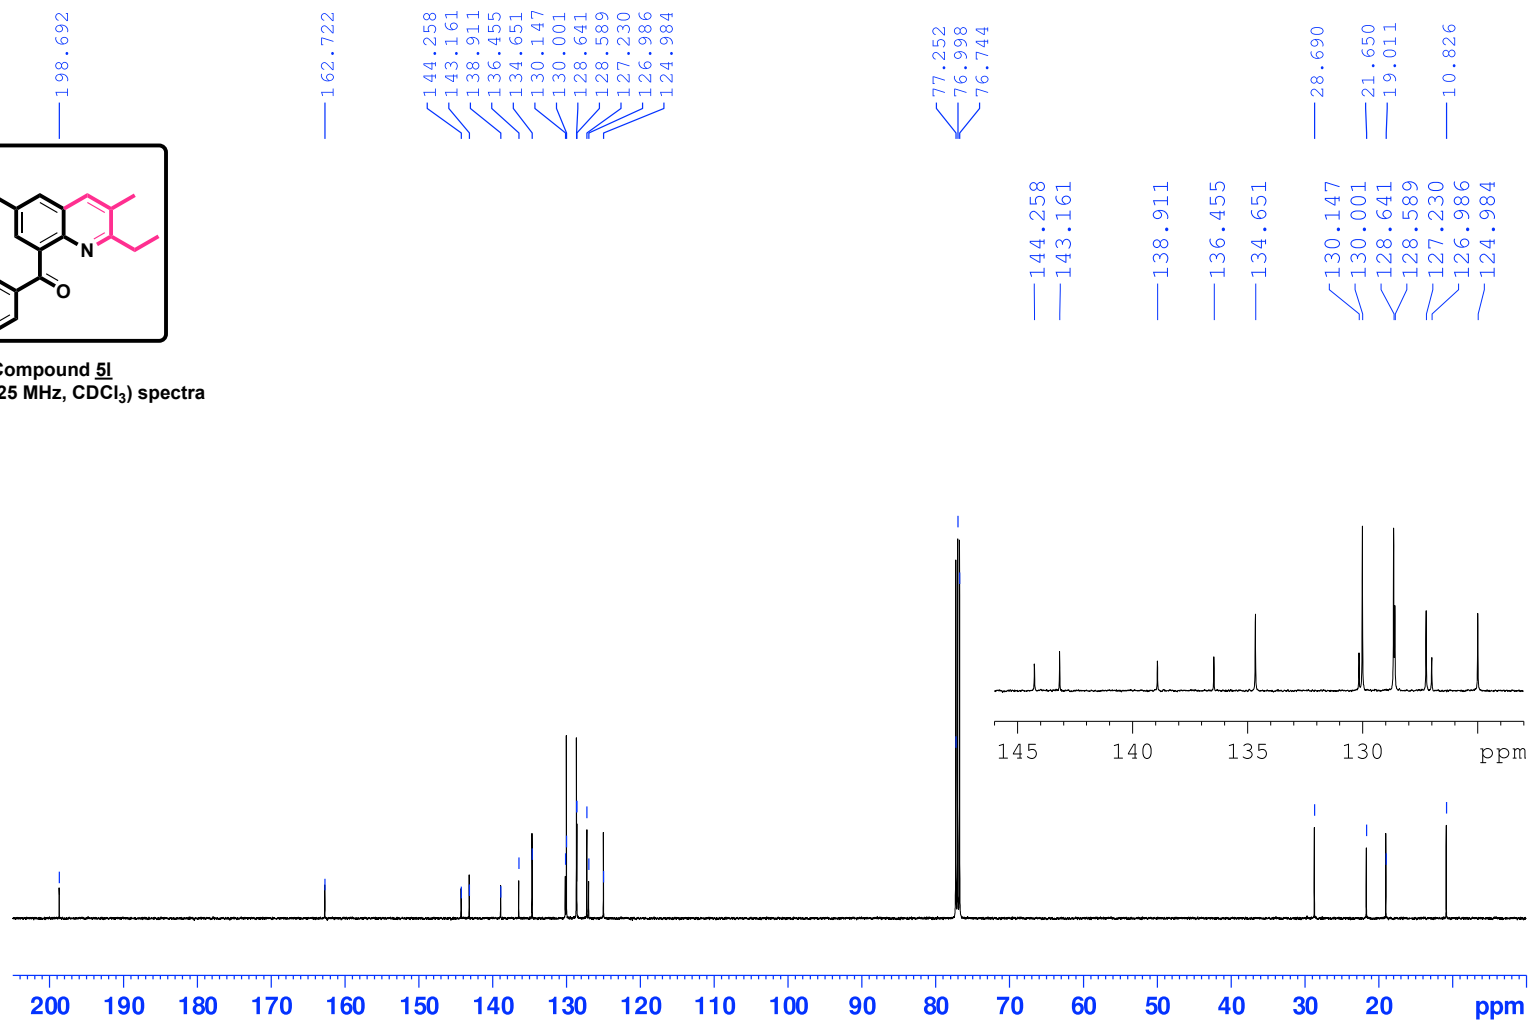

# Compound 5m

1H CKC-731 sep93-94 1016

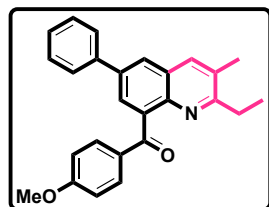

Compound 5m

<sup>1</sup>H NMR (500 MHz, CDCl<sub>3</sub>) spectra

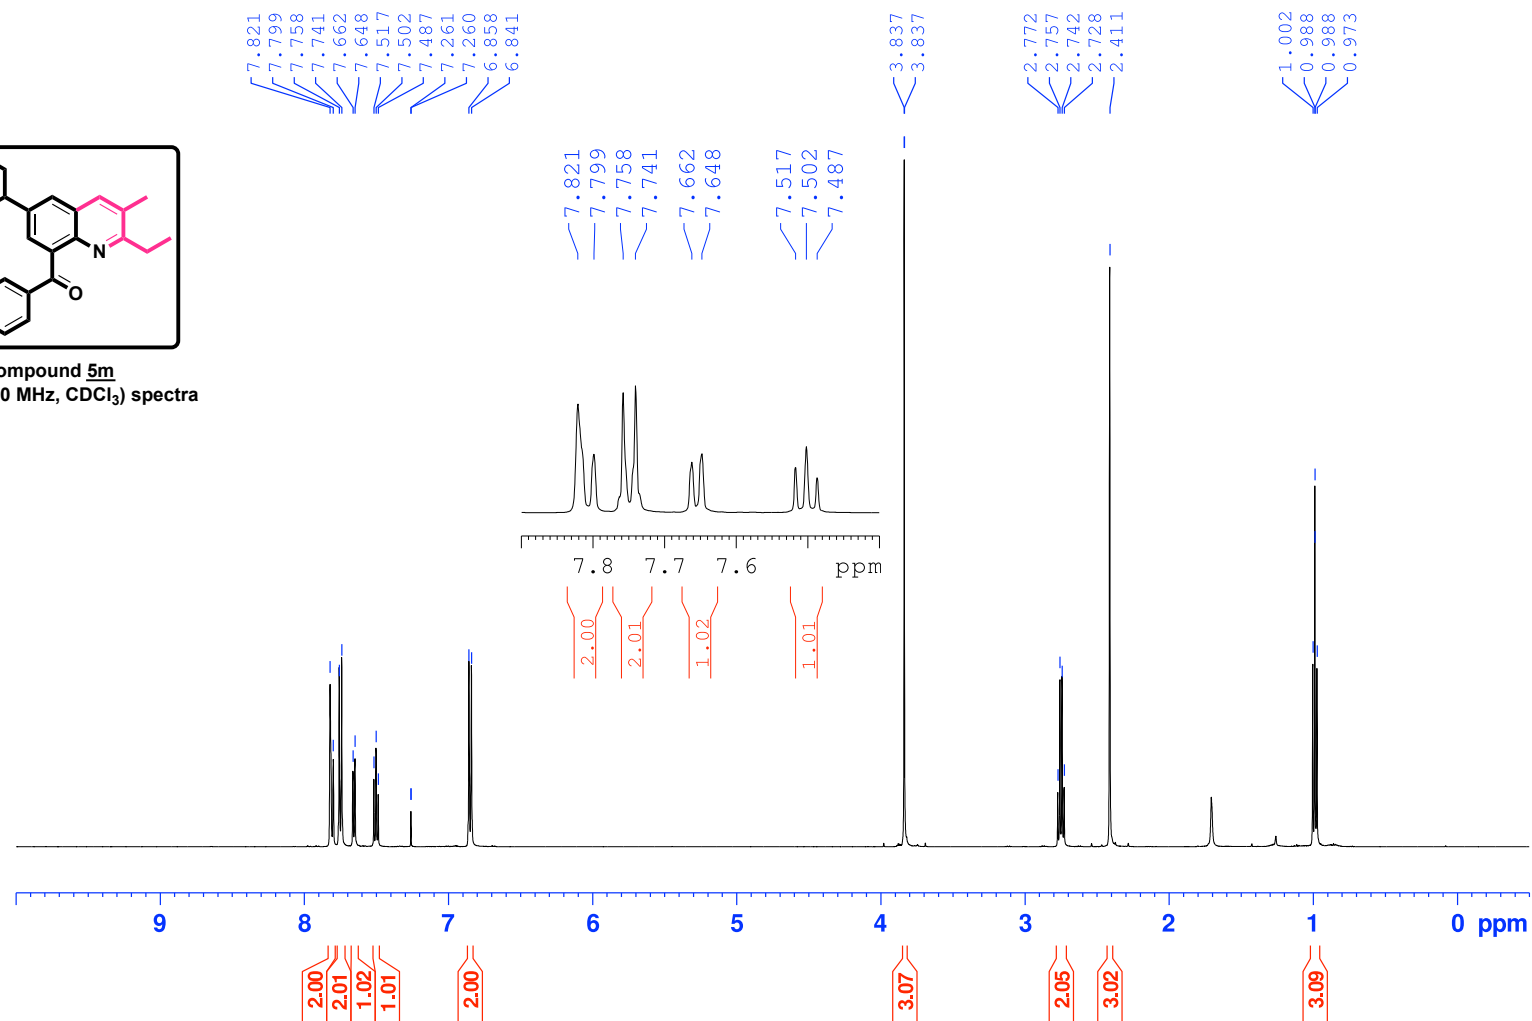

# Compound 5m

13C CKC-731 sep93-94 1016

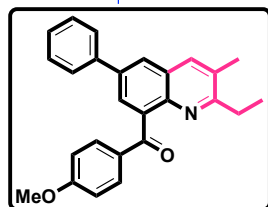

Compound **5m**  
<sup>13</sup>C NMR (125 MHz, CDCl<sub>3</sub>) spectra

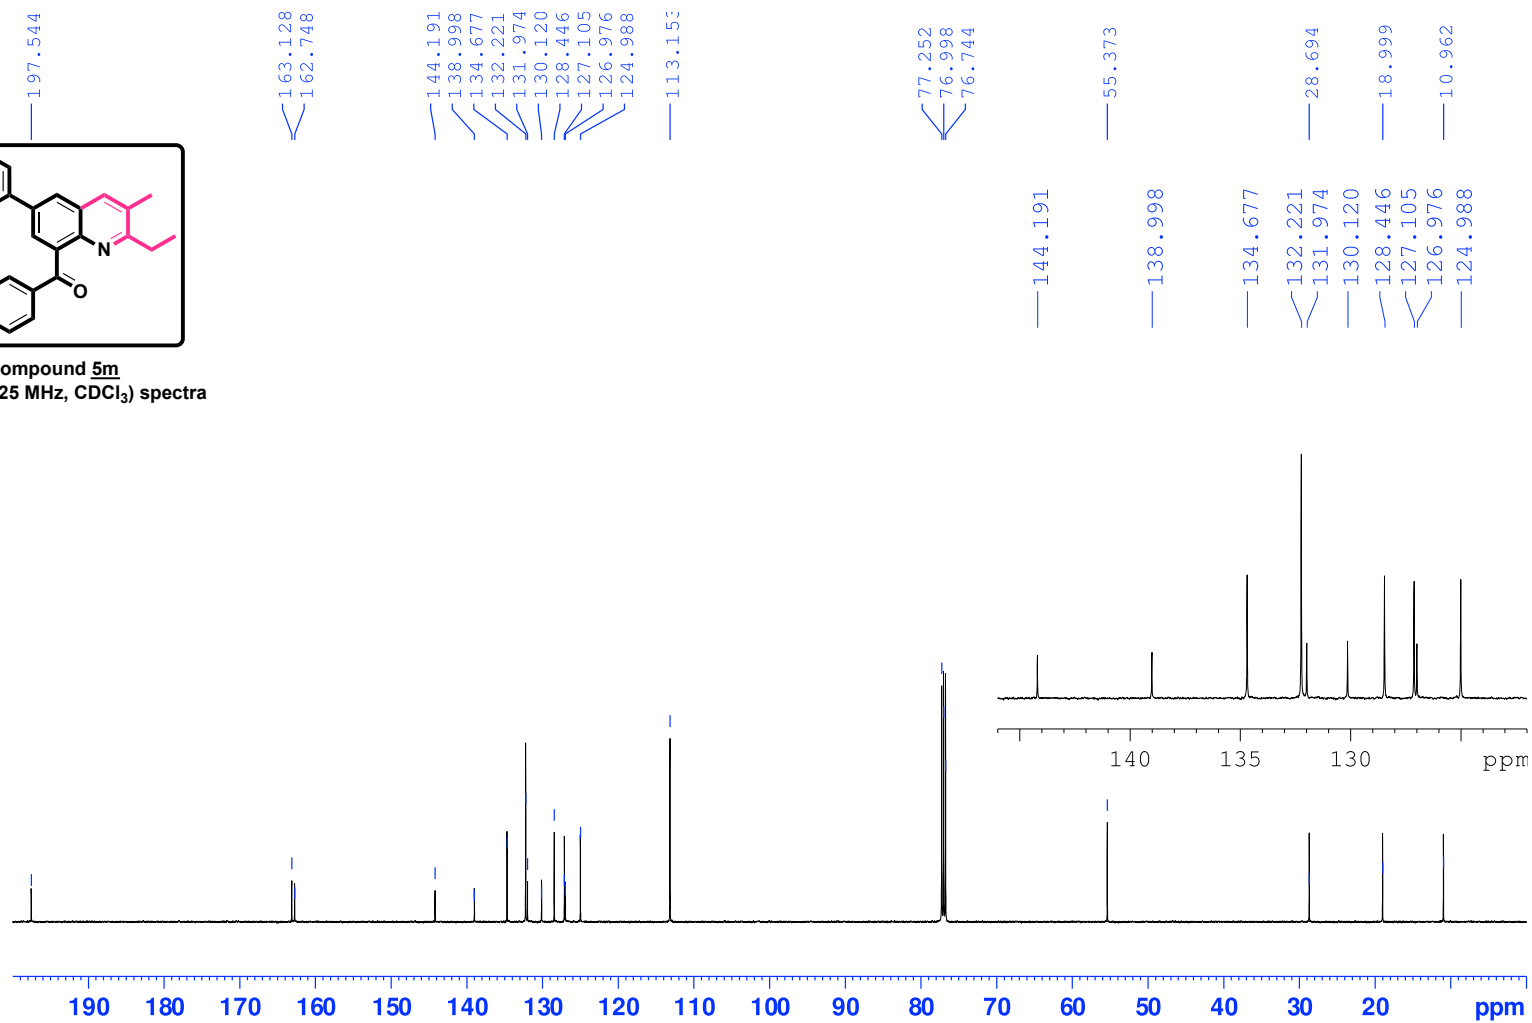

# Compound 5n

1H CKC-734 sep27-28 1021

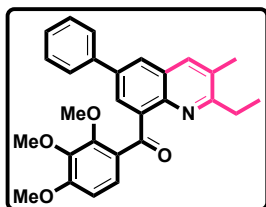

Compound **5n**  
<sup>1</sup>H NMR (500 MHz, CDCl<sub>3</sub>) spectra

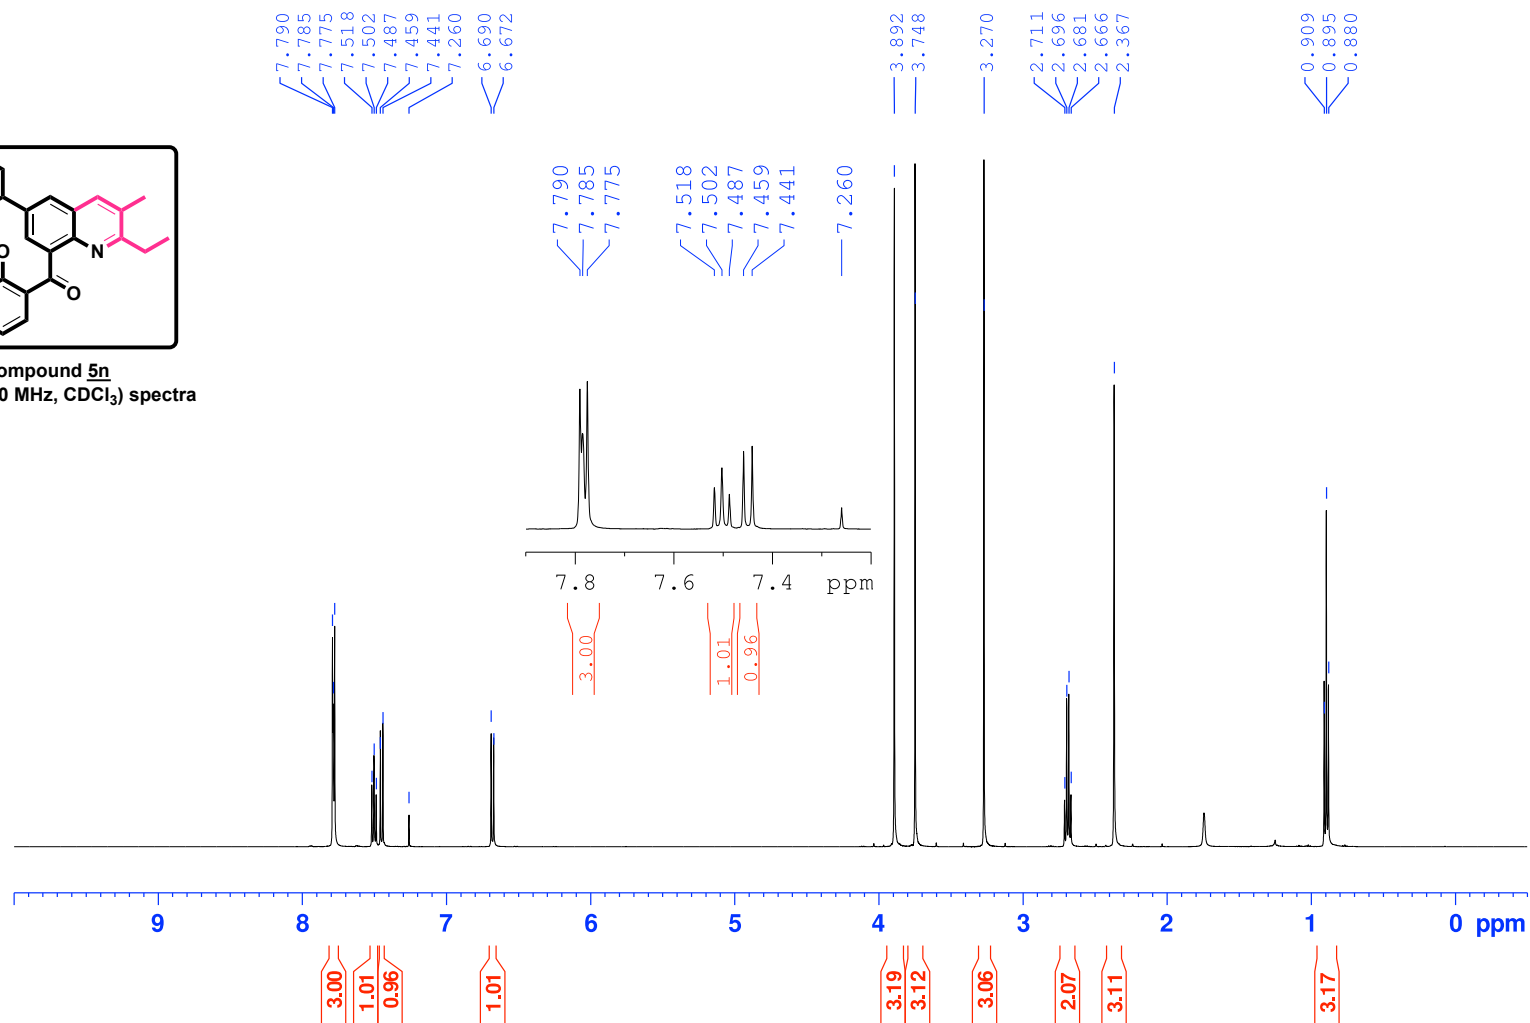

# Compound 5n

13C CKC-734 sep27-28 1021

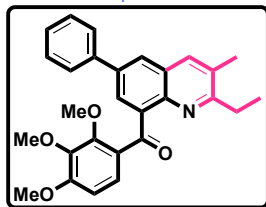

Compound **5n**  
<sup>13</sup>C NMR (125 MHz, CDCl<sub>3</sub>) spectra

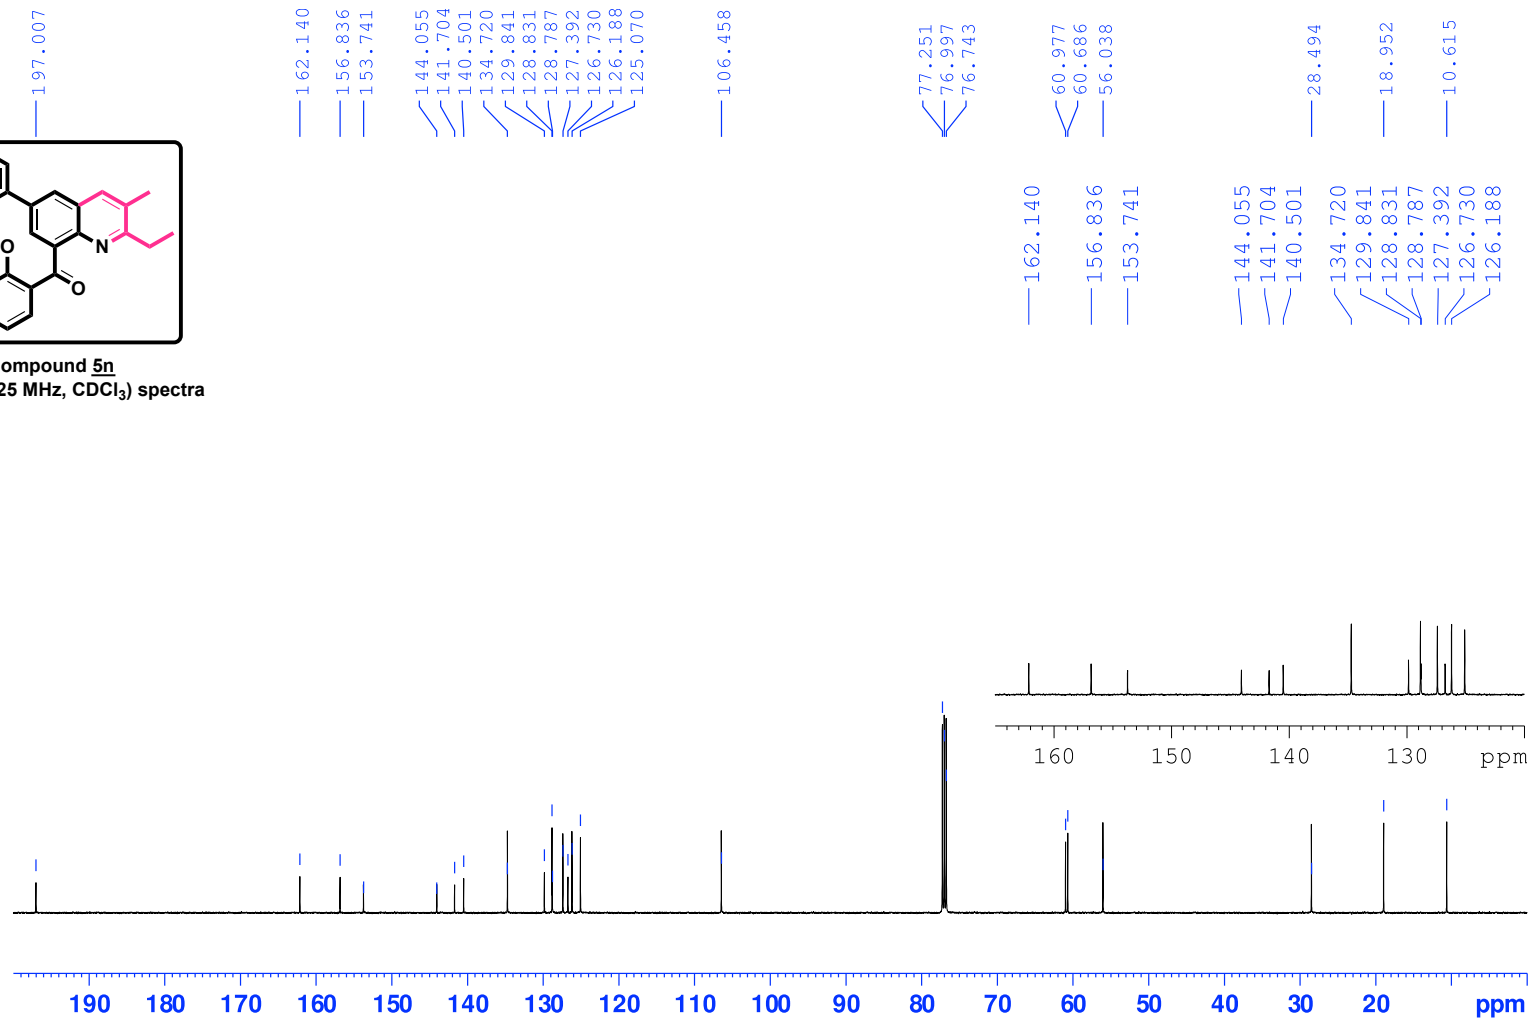

# Compound 5o

1H CKC-732 sep21-22 1016

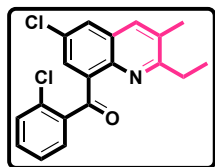

Compound 5o

<sup>1</sup>H NMR (500 MHz, CDCl<sub>3</sub>) spectra

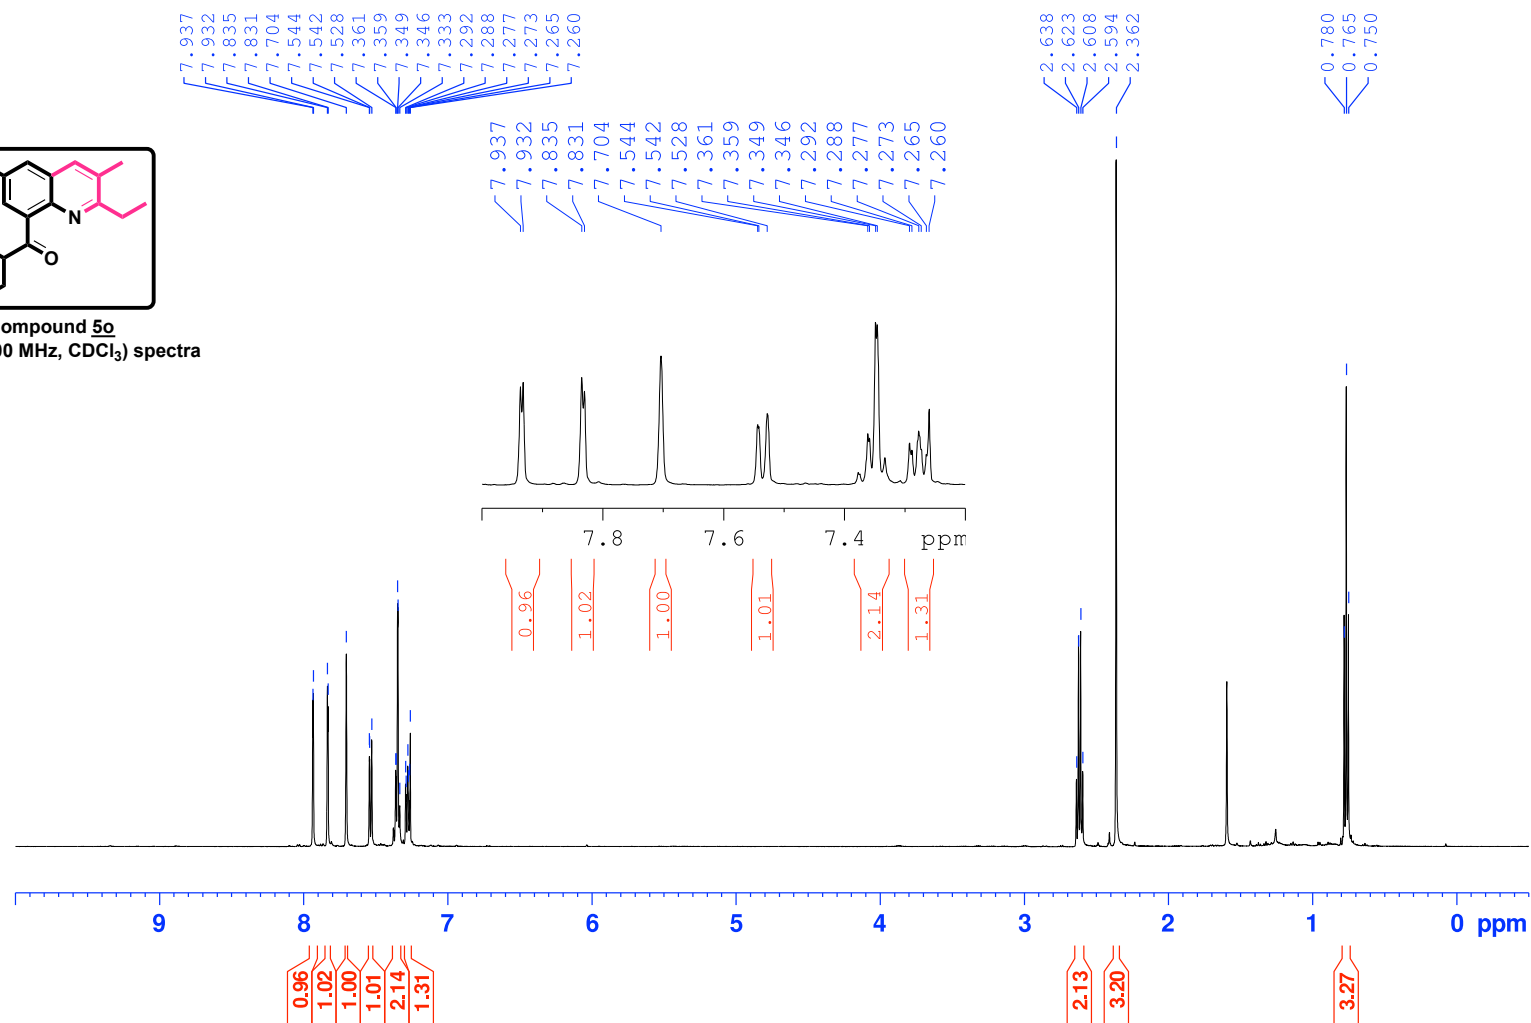



# Compound 5o

13C CKC-732 sep21-22 1016

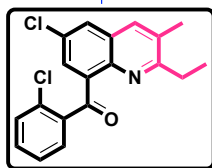

Compound 5o

<sup>13</sup>C NMR (125 MHz, CDCl<sub>3</sub>) spectra

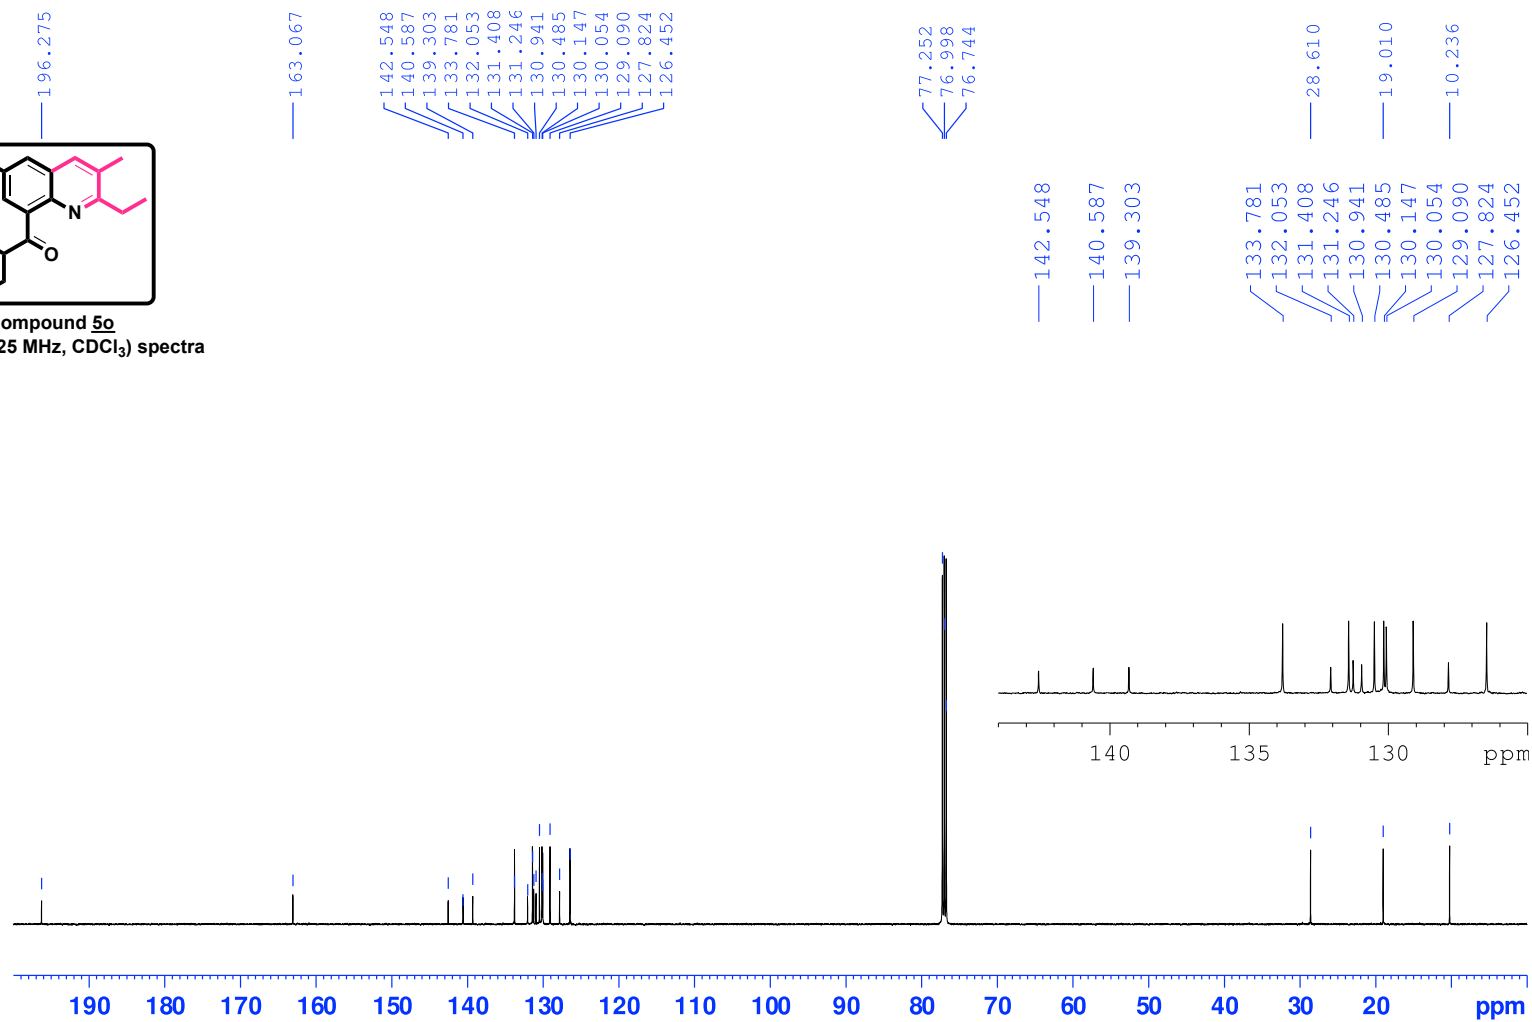

## Compound 5p

1H CKC-735 sep10-11 1021

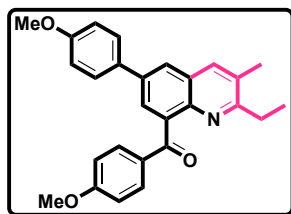

Compound 5p  
<sup>1</sup>H NMR (500 MHz, CDCl<sub>3</sub>) spectra

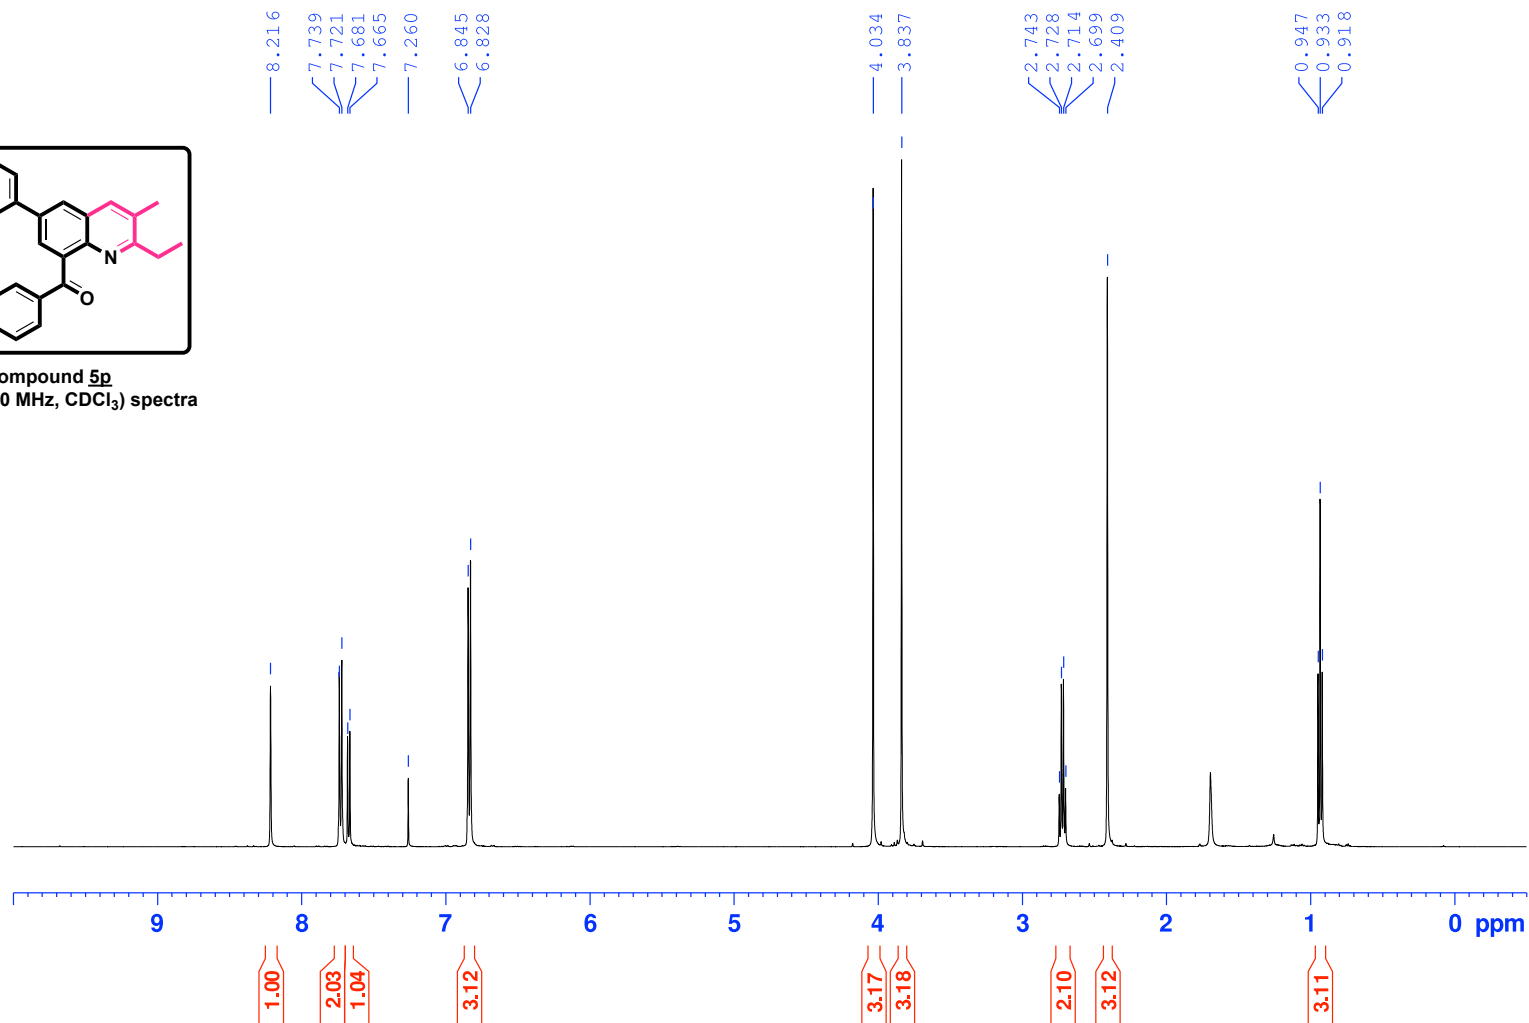

# Compound 5p

13C CKC-735 sep10-11 1021

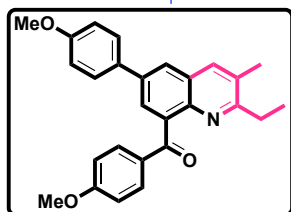

Compound 5p  
<sup>13</sup>C NMR (125 MHz, CDCl<sub>3</sub>) spectra

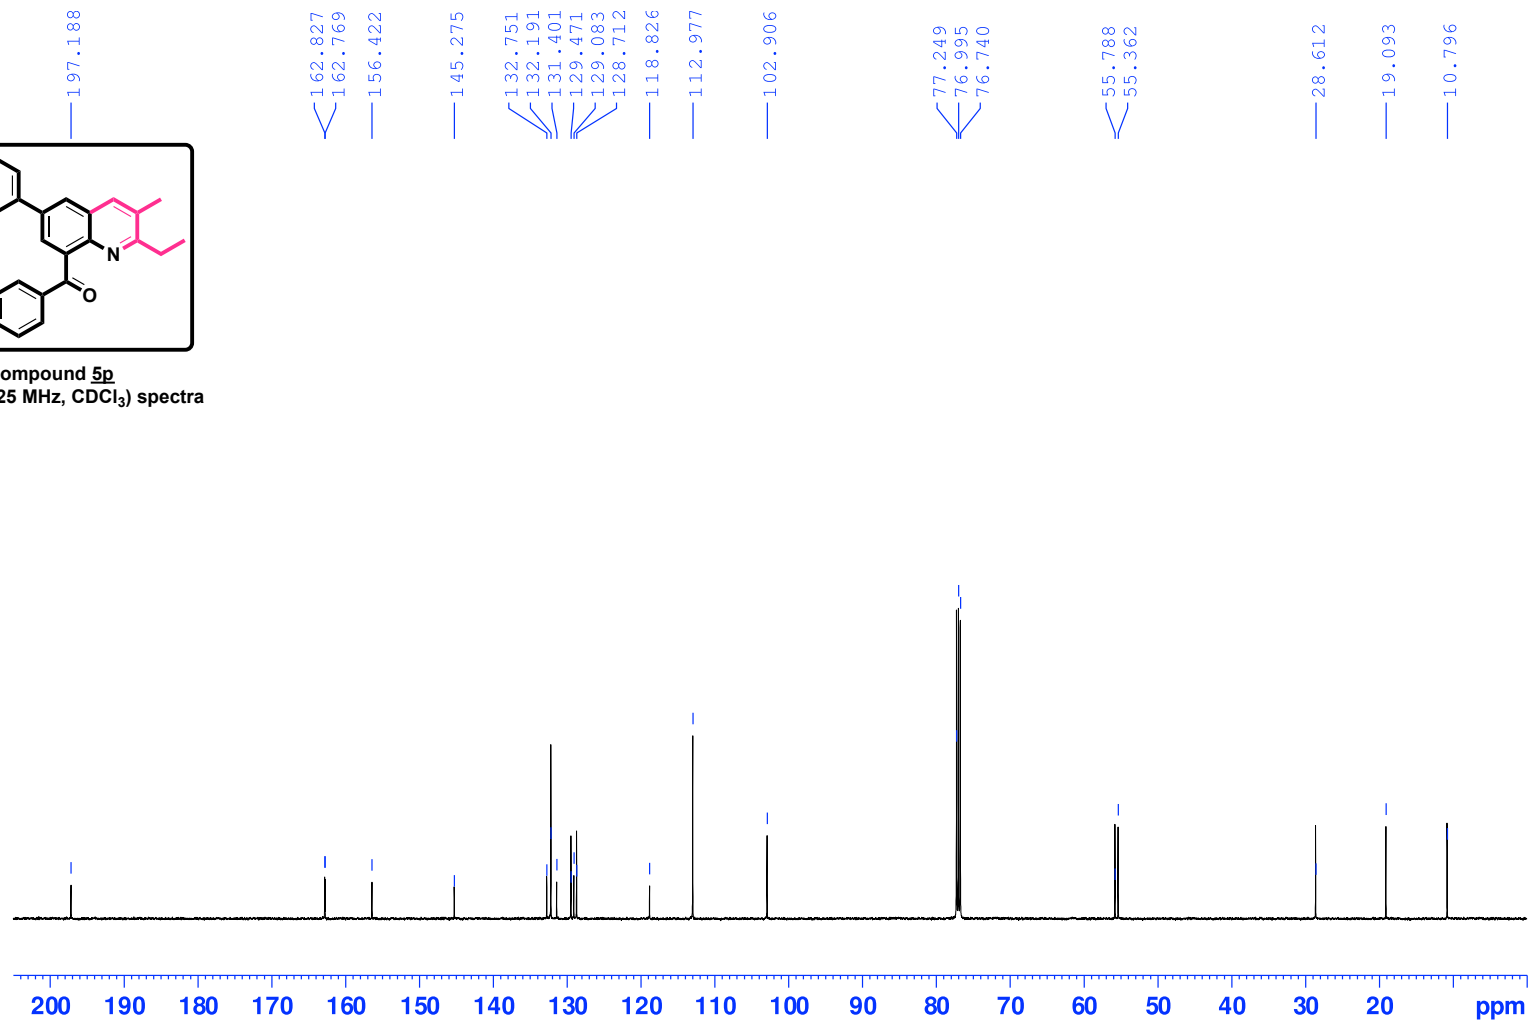

# Compound 5q

1H CKC-736 sep32-33 1026

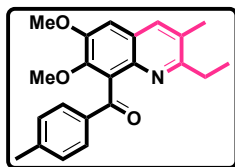

Compound **5q**  
<sup>1</sup>H NMR (500 MHz, CDCl<sub>3</sub>) spectra

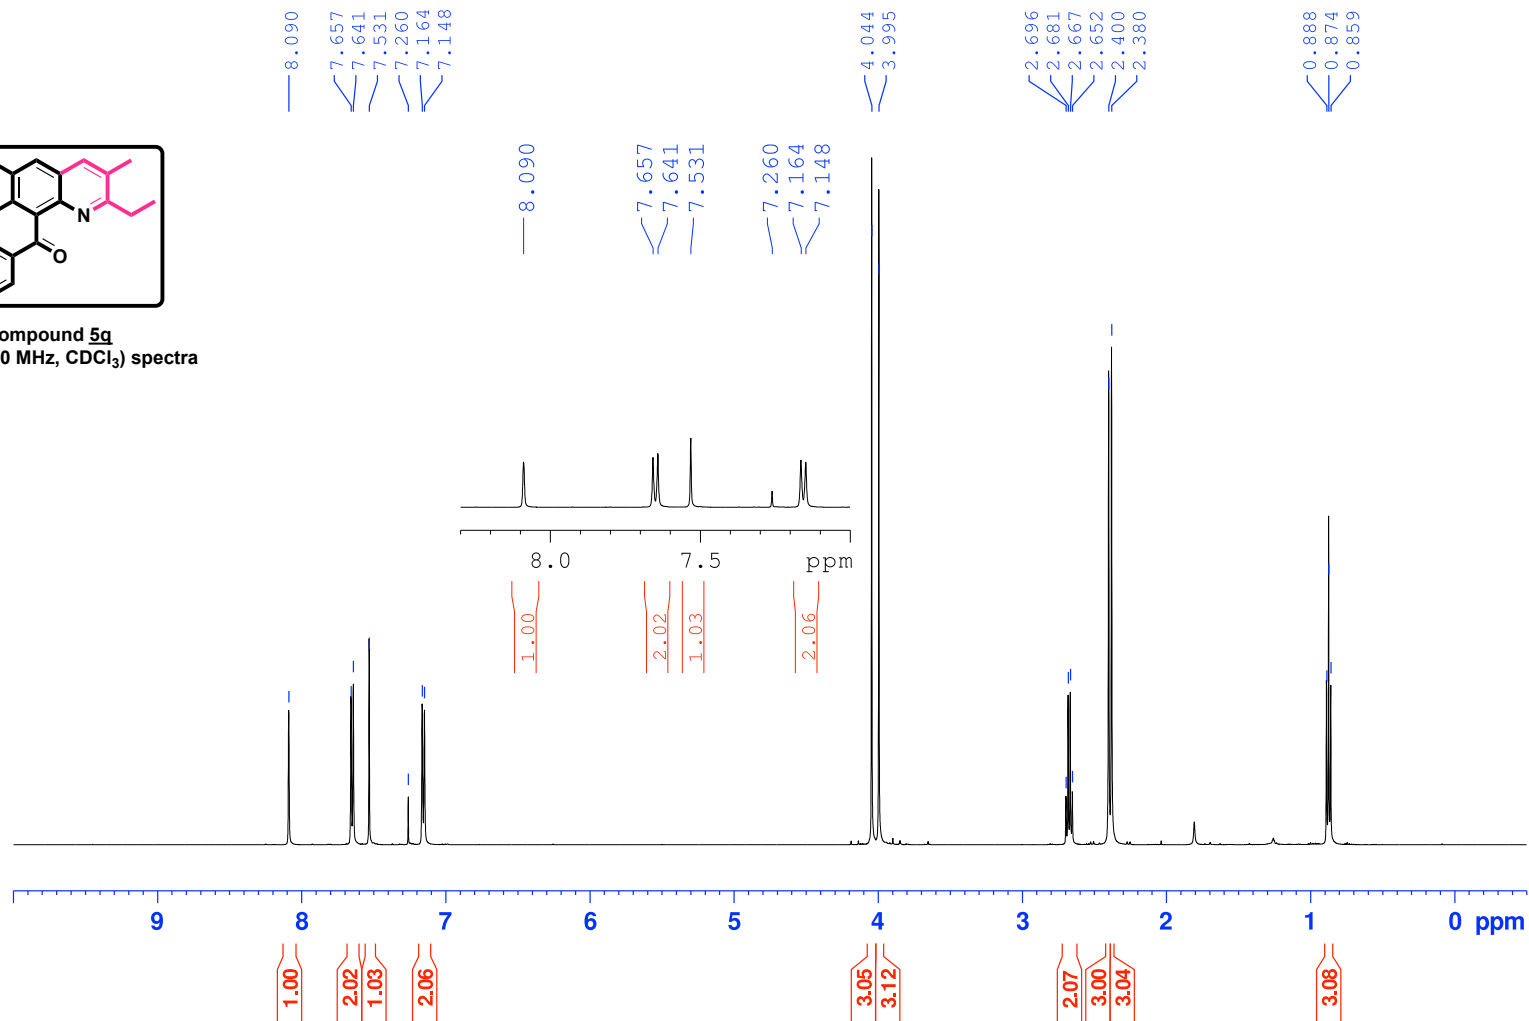

# Compound 5q

13C CKC-736 sep32-33 1026

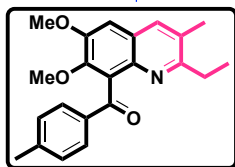

Compound 5q

<sup>13</sup>C NMR (125 MHz, CDCl<sub>3</sub>) spectra

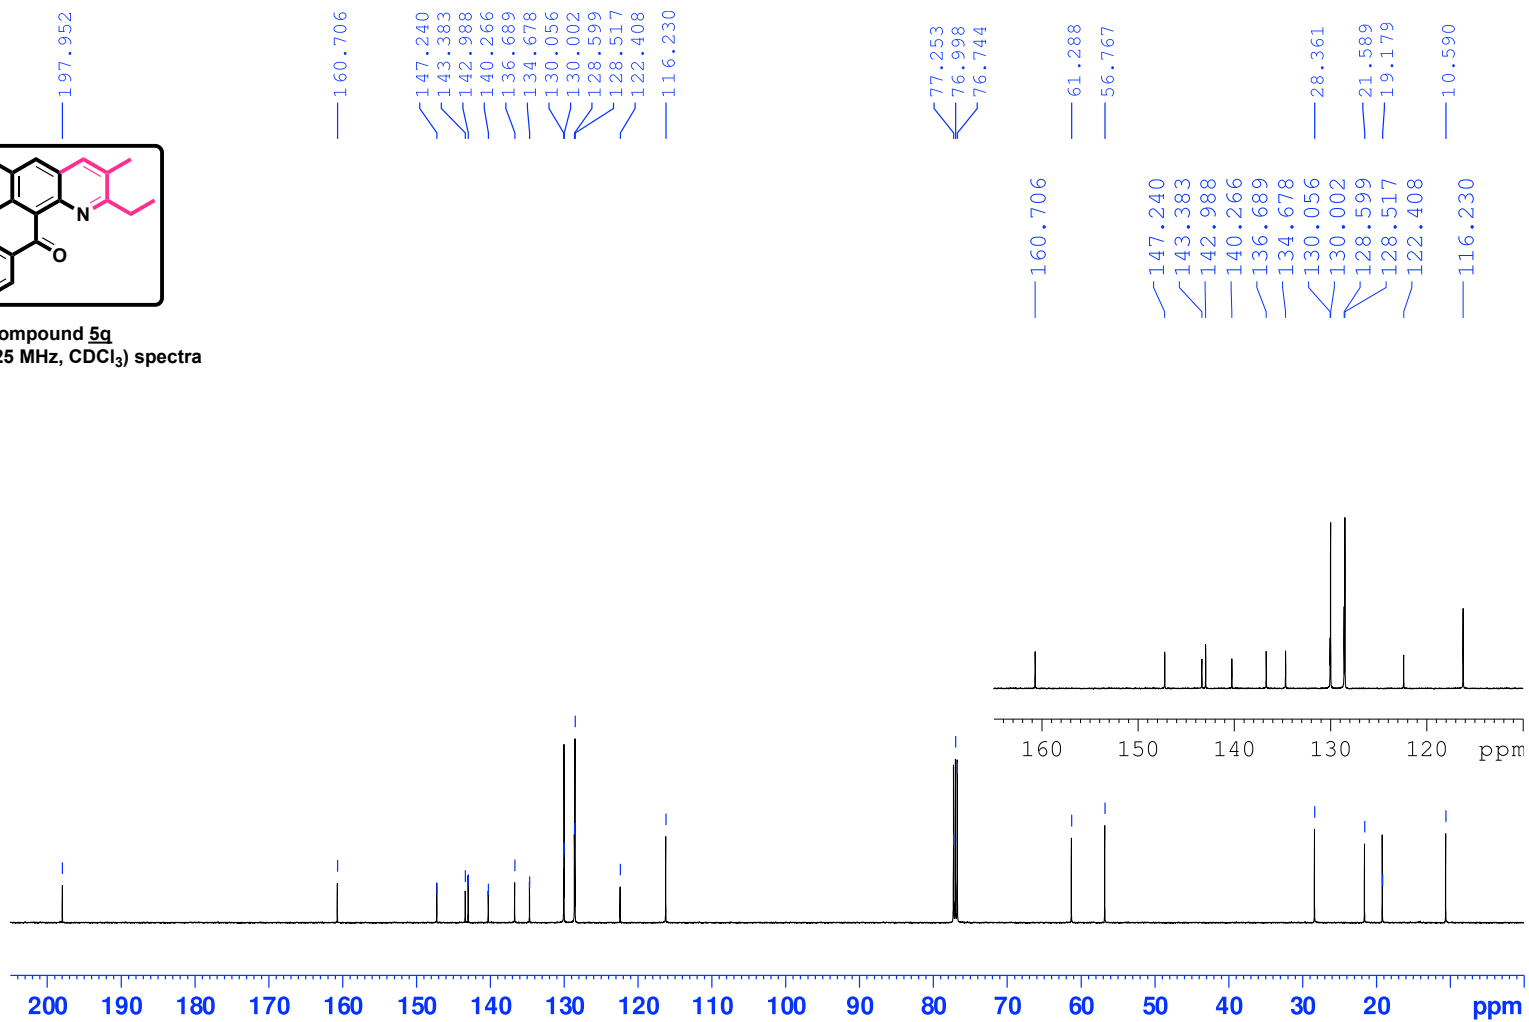

# Compound 5r

1H CKC-737 sep24-25 1027

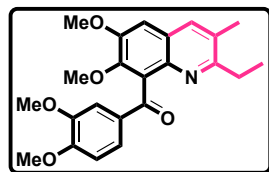

Compound 5r  
<sup>1</sup>H NMR (500 MHz, CDCl<sub>3</sub>) spectra

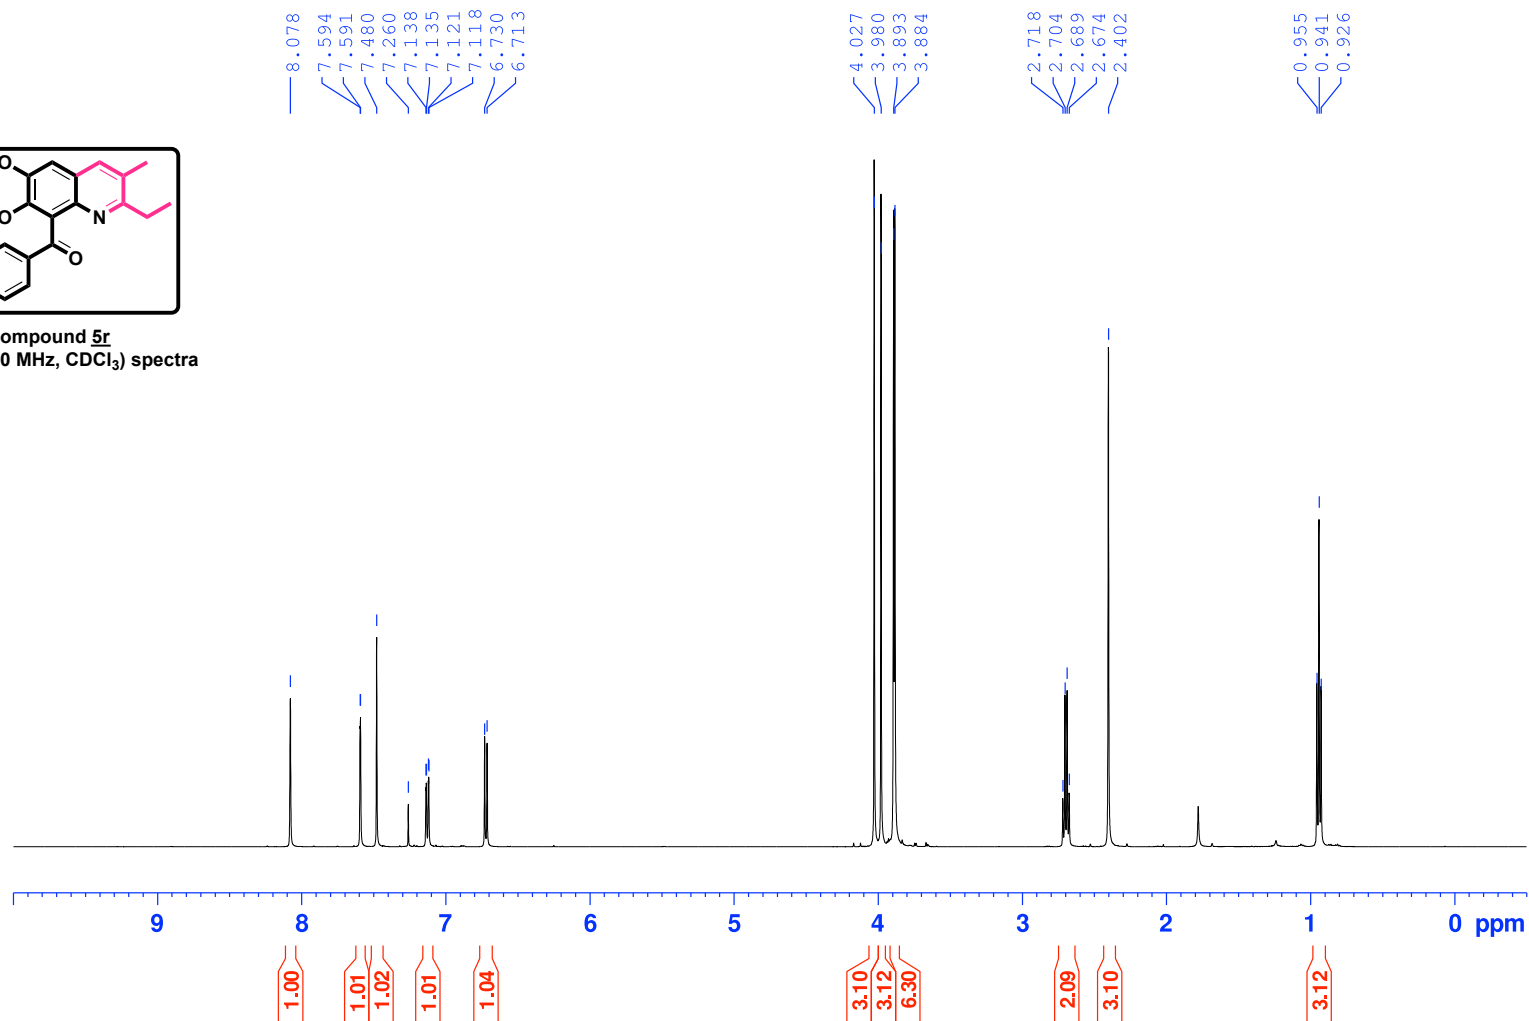

# Compound 5r

13C CKC-737 sep24-25 1027

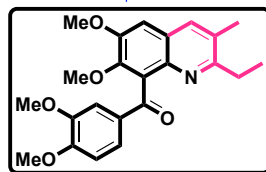

Compound **5r**

<sup>13</sup>C NMR (125 MHz, CDCl<sub>3</sub>) spectra

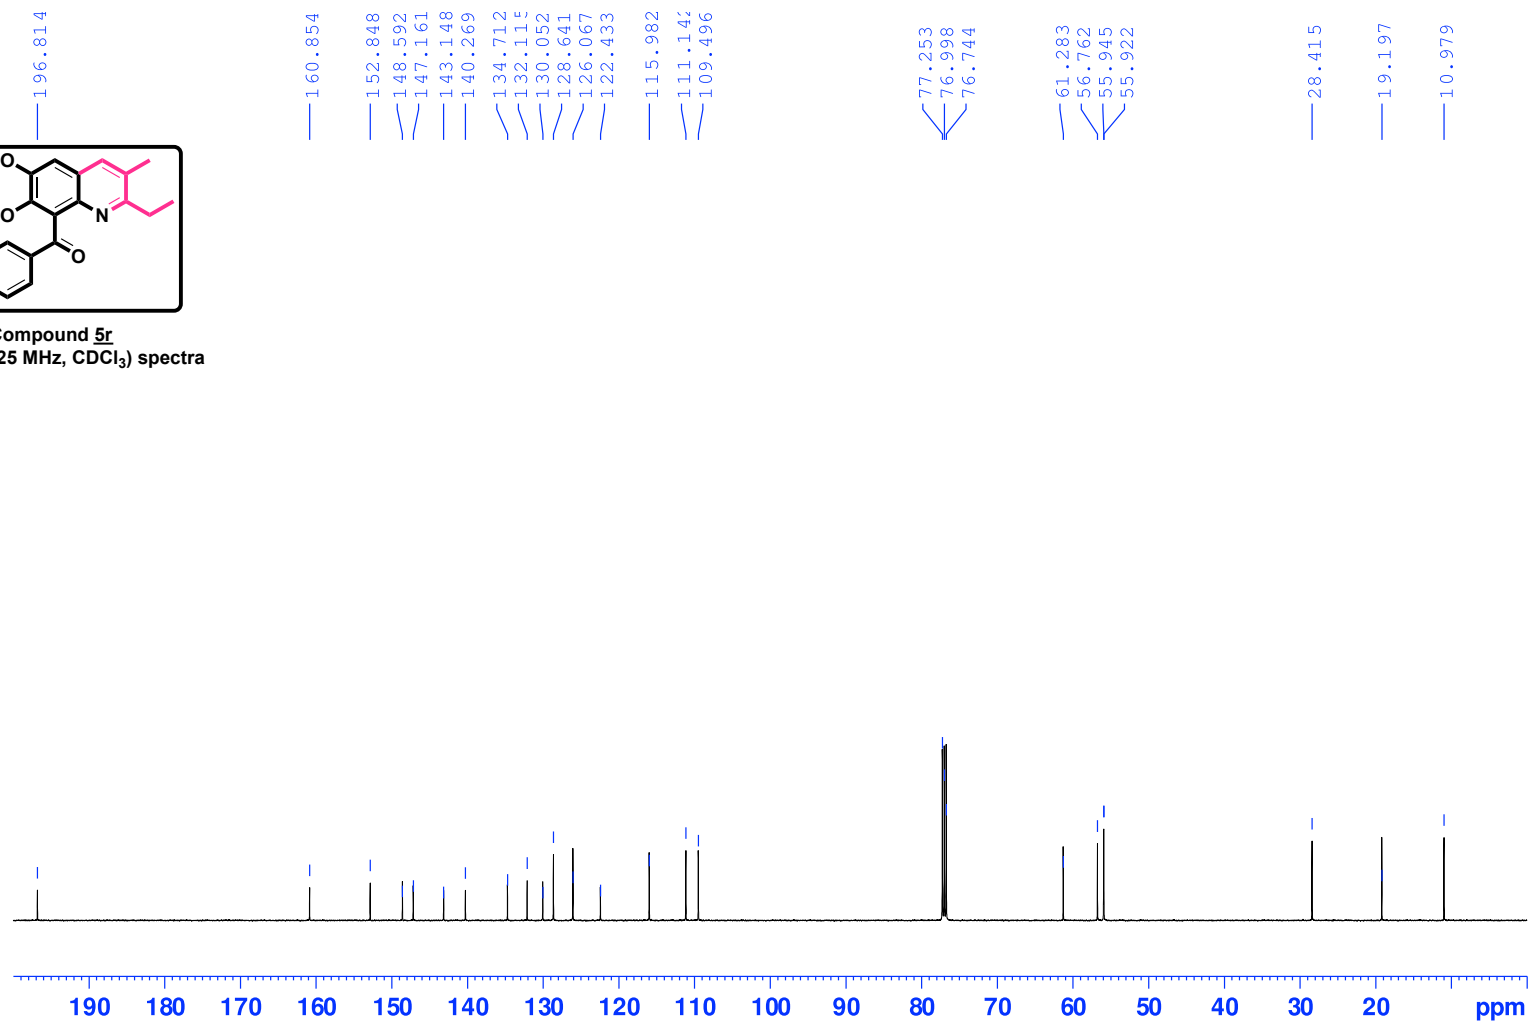

# Compound 5s

1H CKC-738 sep20-21 1028

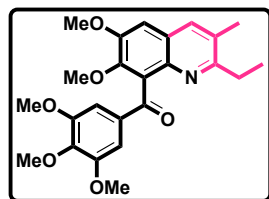

Compound 5s  
<sup>1</sup>H NMR (500 MHz, CDCl<sub>3</sub>) spectra

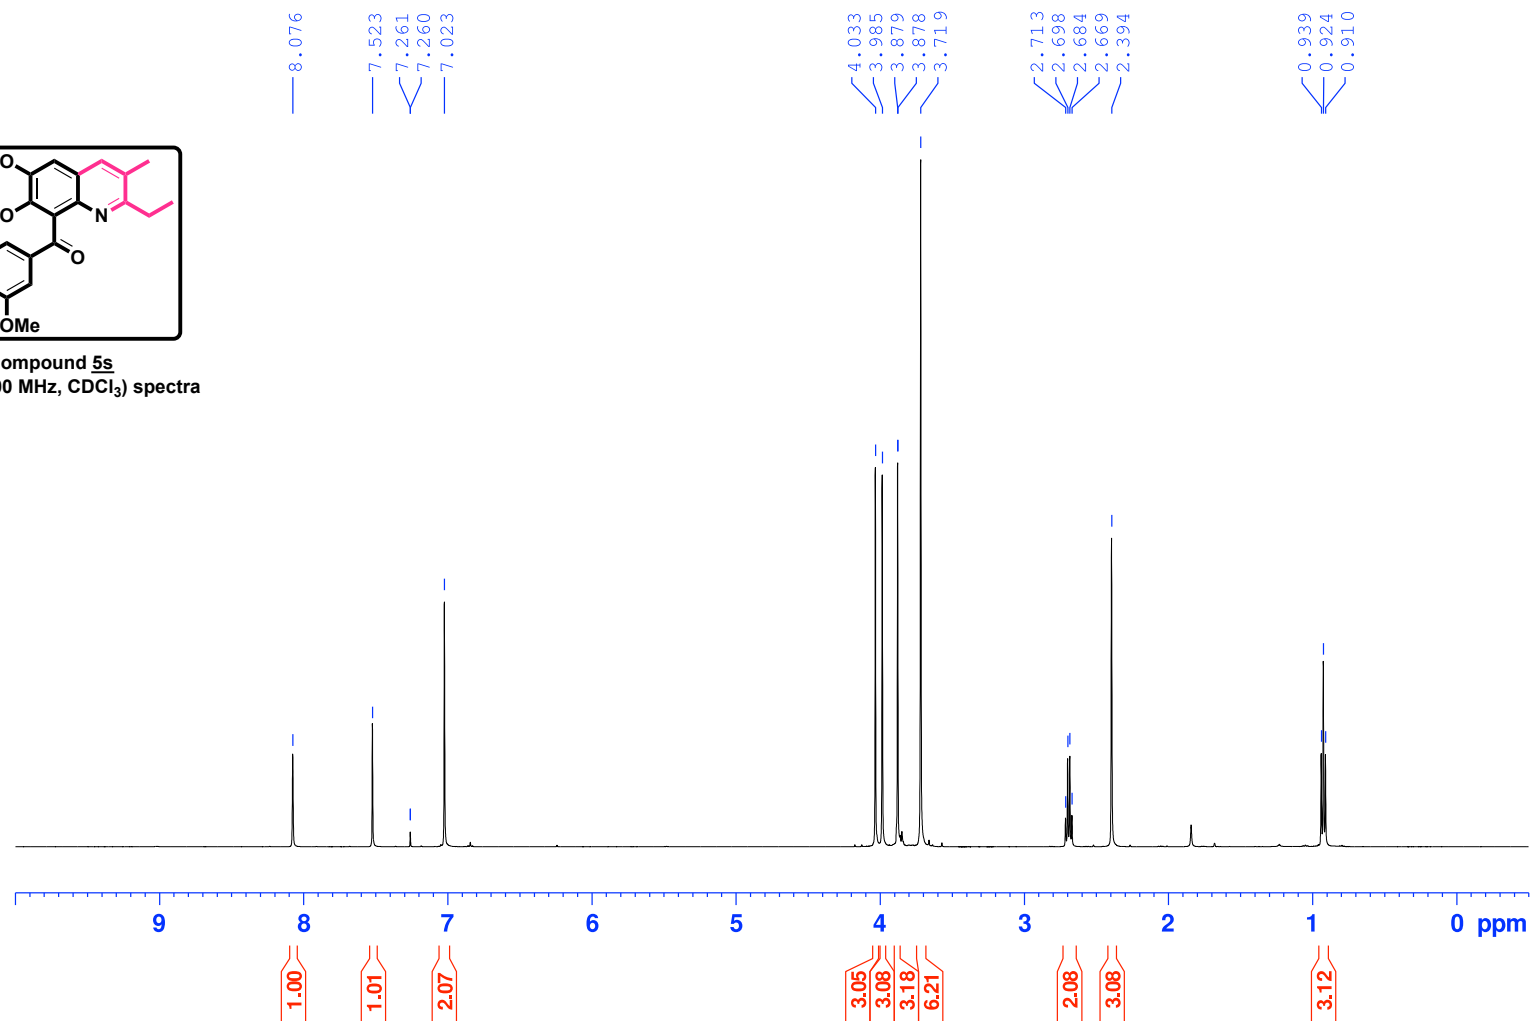



# Compound 5s

13C CKC-738 sep20-21 1028

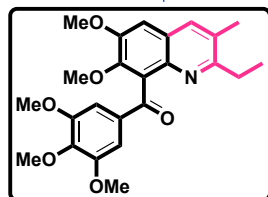

Compound **5s**  
<sup>13</sup>C NMR (125 MHz, CDCl<sub>3</sub>) spectra

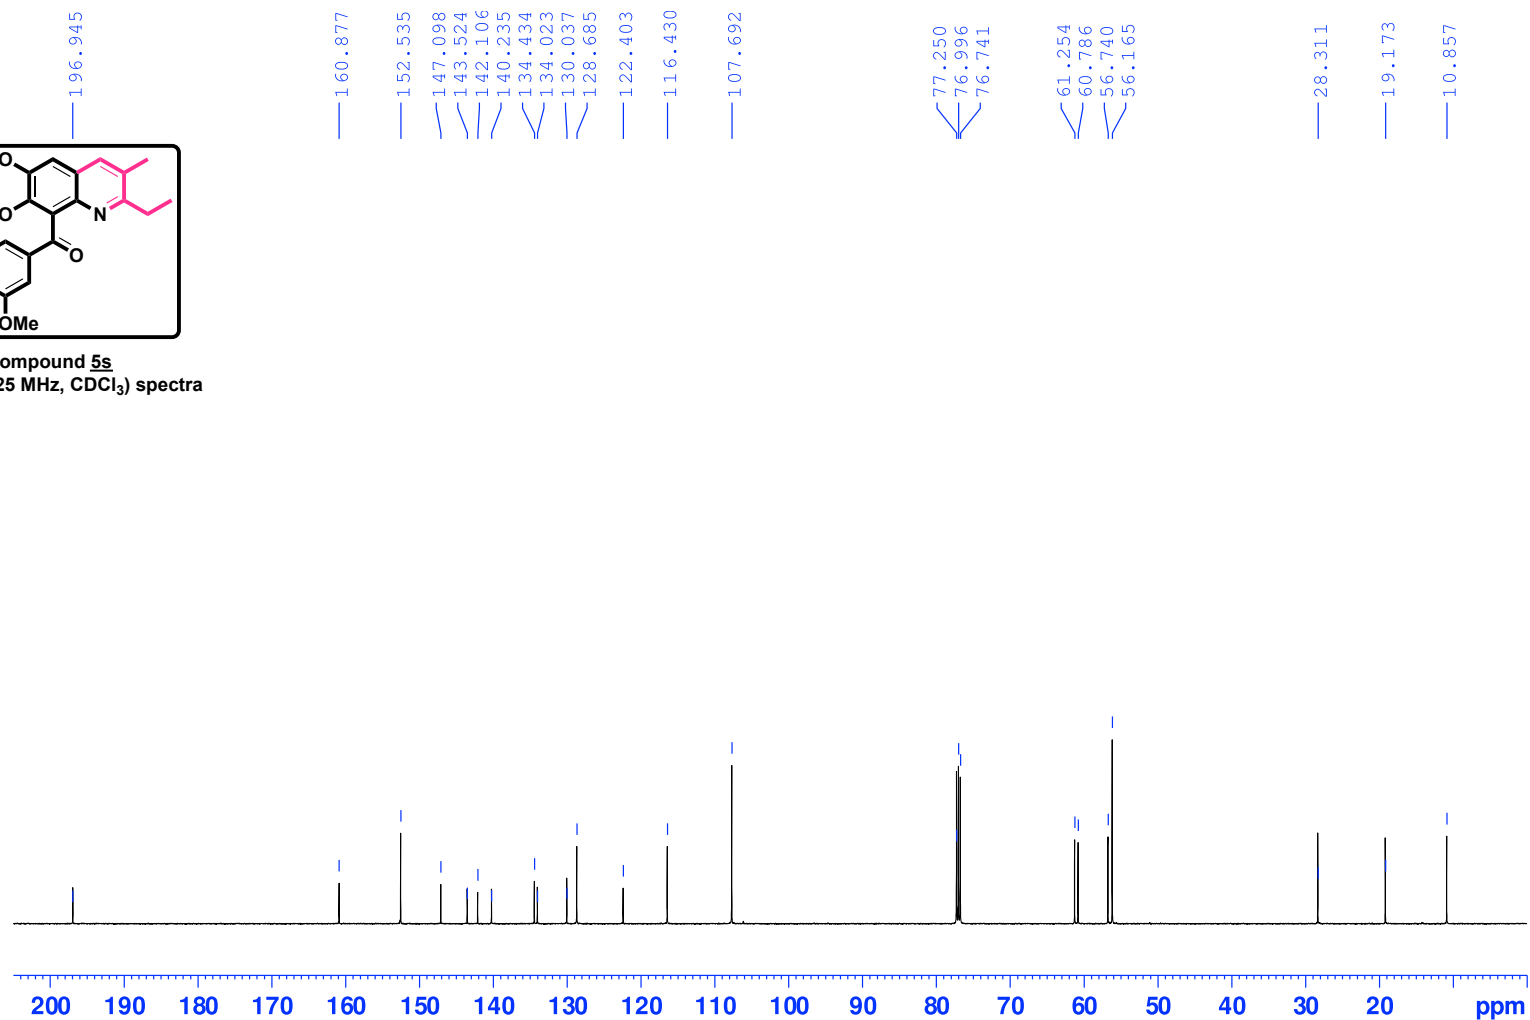

## Compound 6a

1H CYL-408 sep30-31 1127

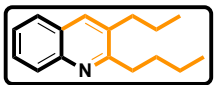

**Compound 6a**  
**<sup>1</sup>H NMR (500 MHz, CDCl<sub>3</sub>) spectra**

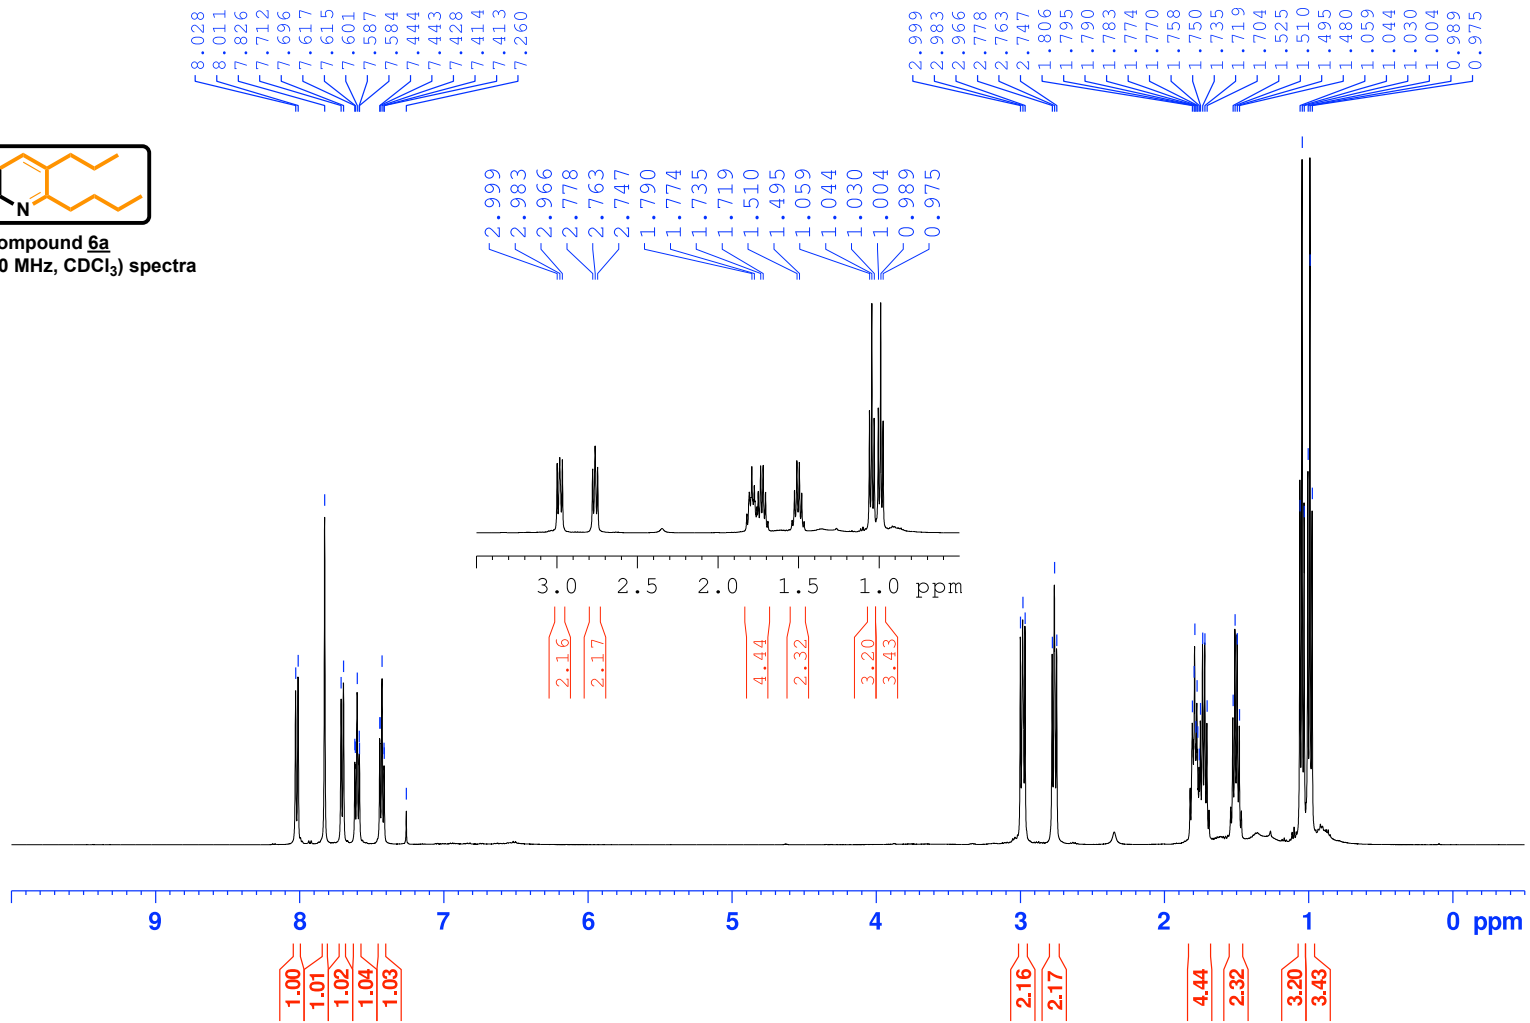

# Compound 6a

13C CYL-408 sep30-31 1127

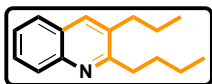

Compound **6a**  
<sup>13</sup>C NMR (125 MHz, CDCl<sub>3</sub>) spectra

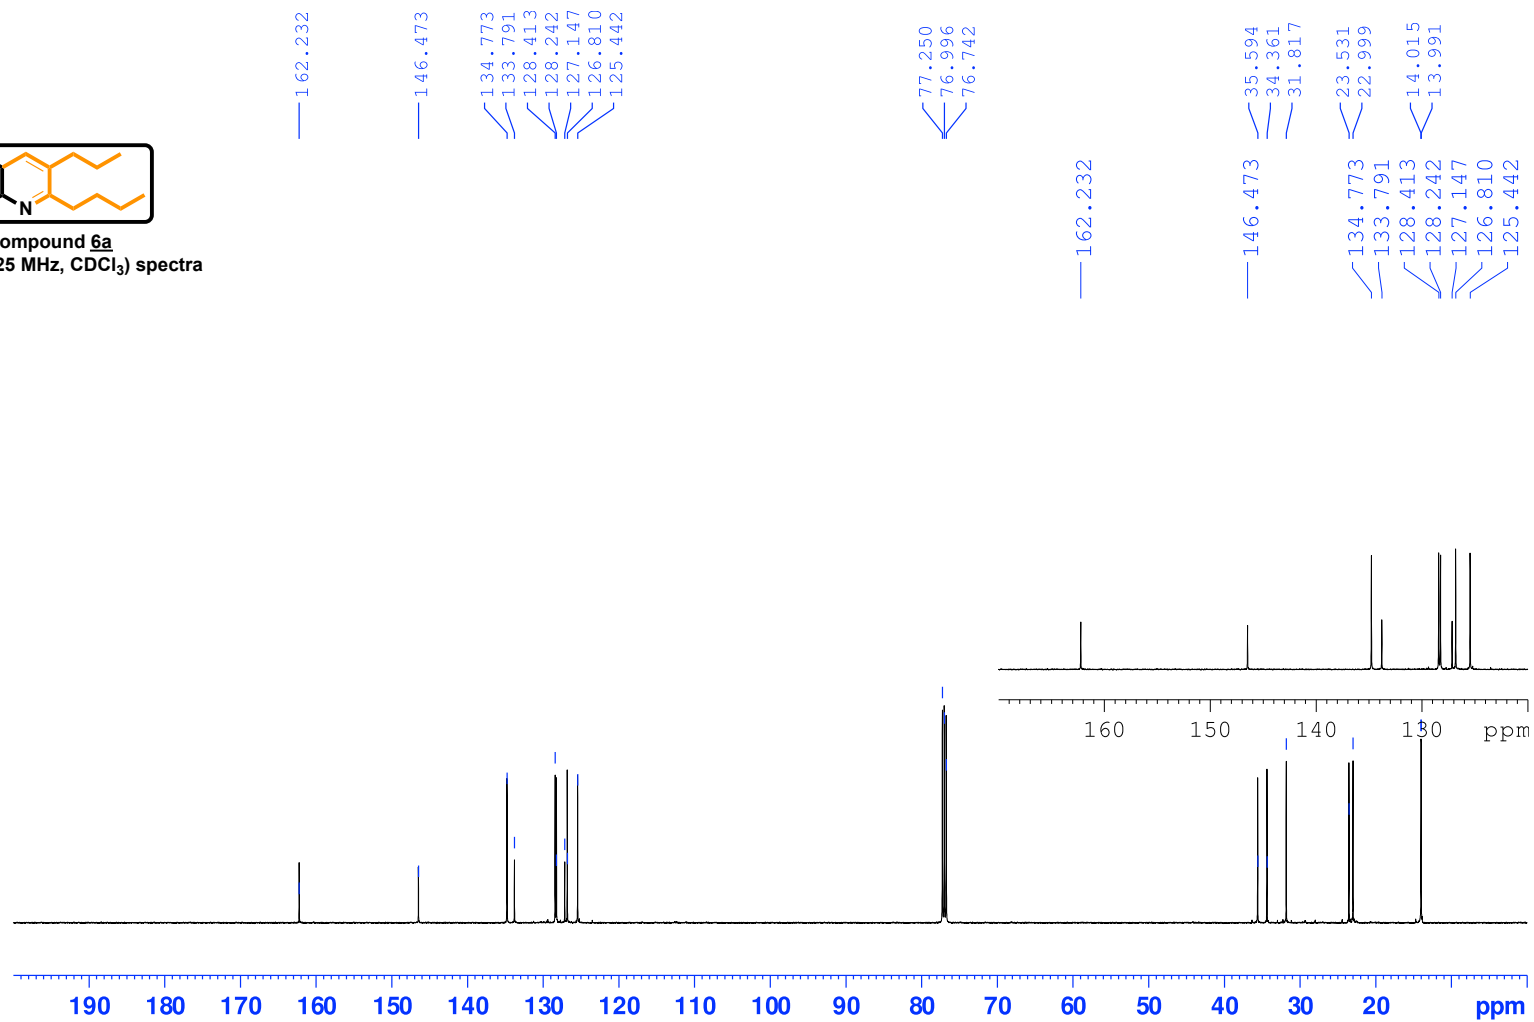

# Compound 6b

1H CYL-411 sep27-28 1204

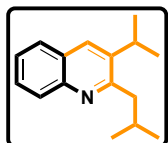

Compound **6b**  
 $^1\text{H}$  NMR (500 MHz,  $\text{CDCl}_3$ ) spectra

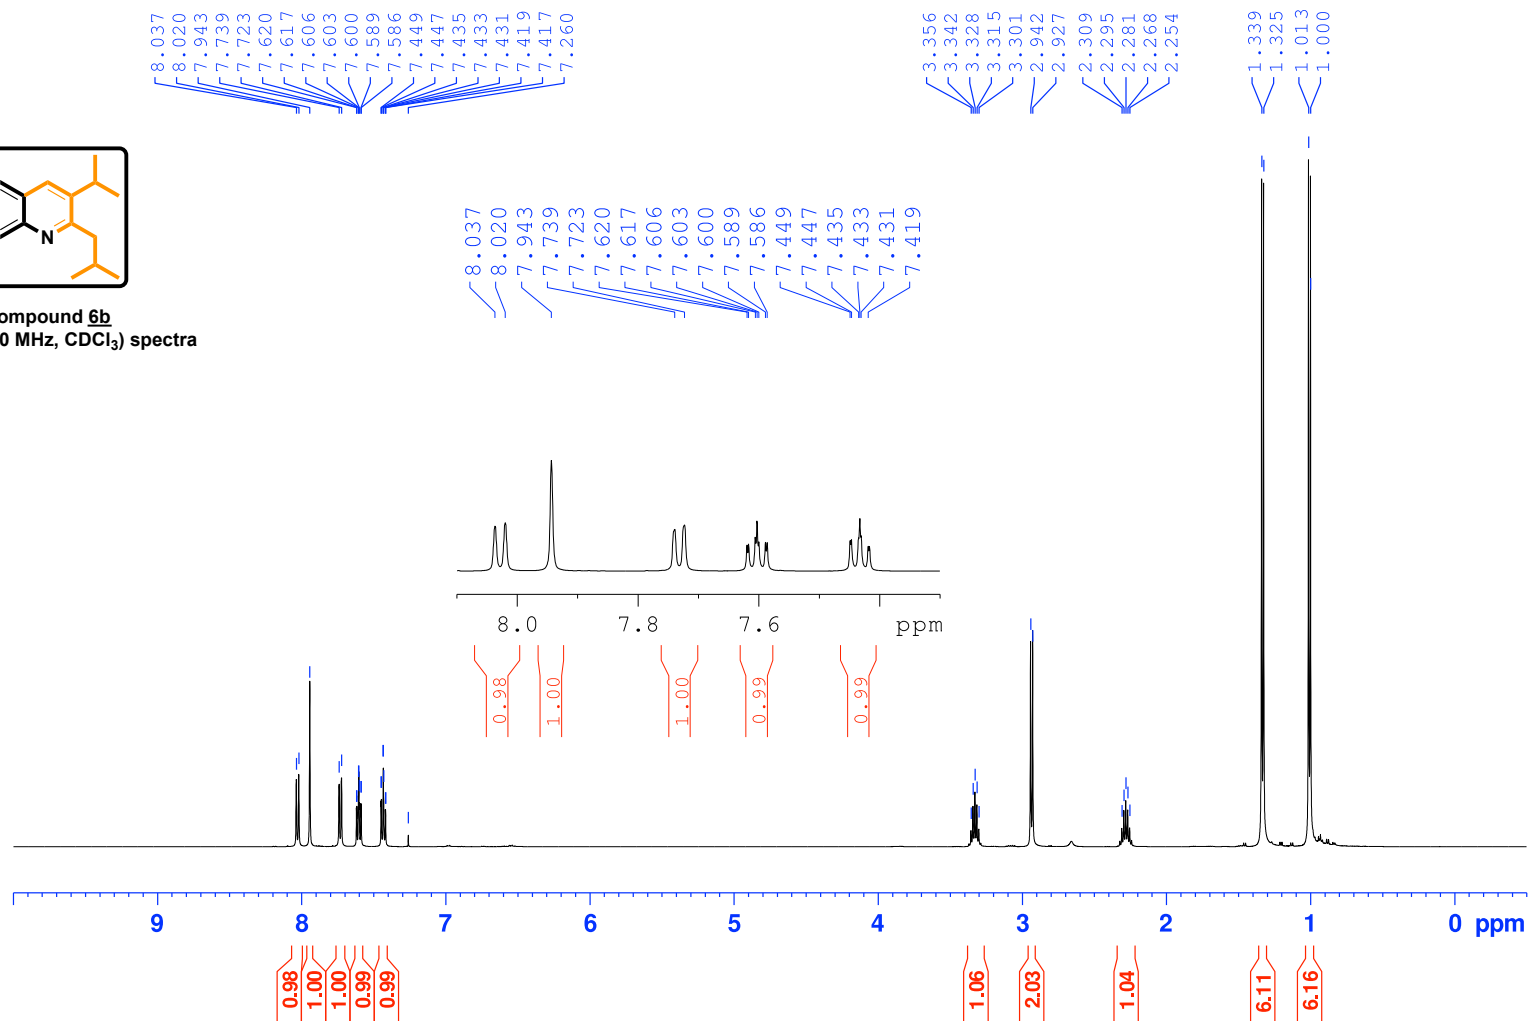

# Compound 6b

13C CYL-411 sep27-28 1204

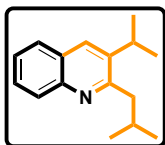

**Compound 6b**  
<sup>13</sup>C NMR (125 MHz, CDCl<sub>3</sub>) spectra

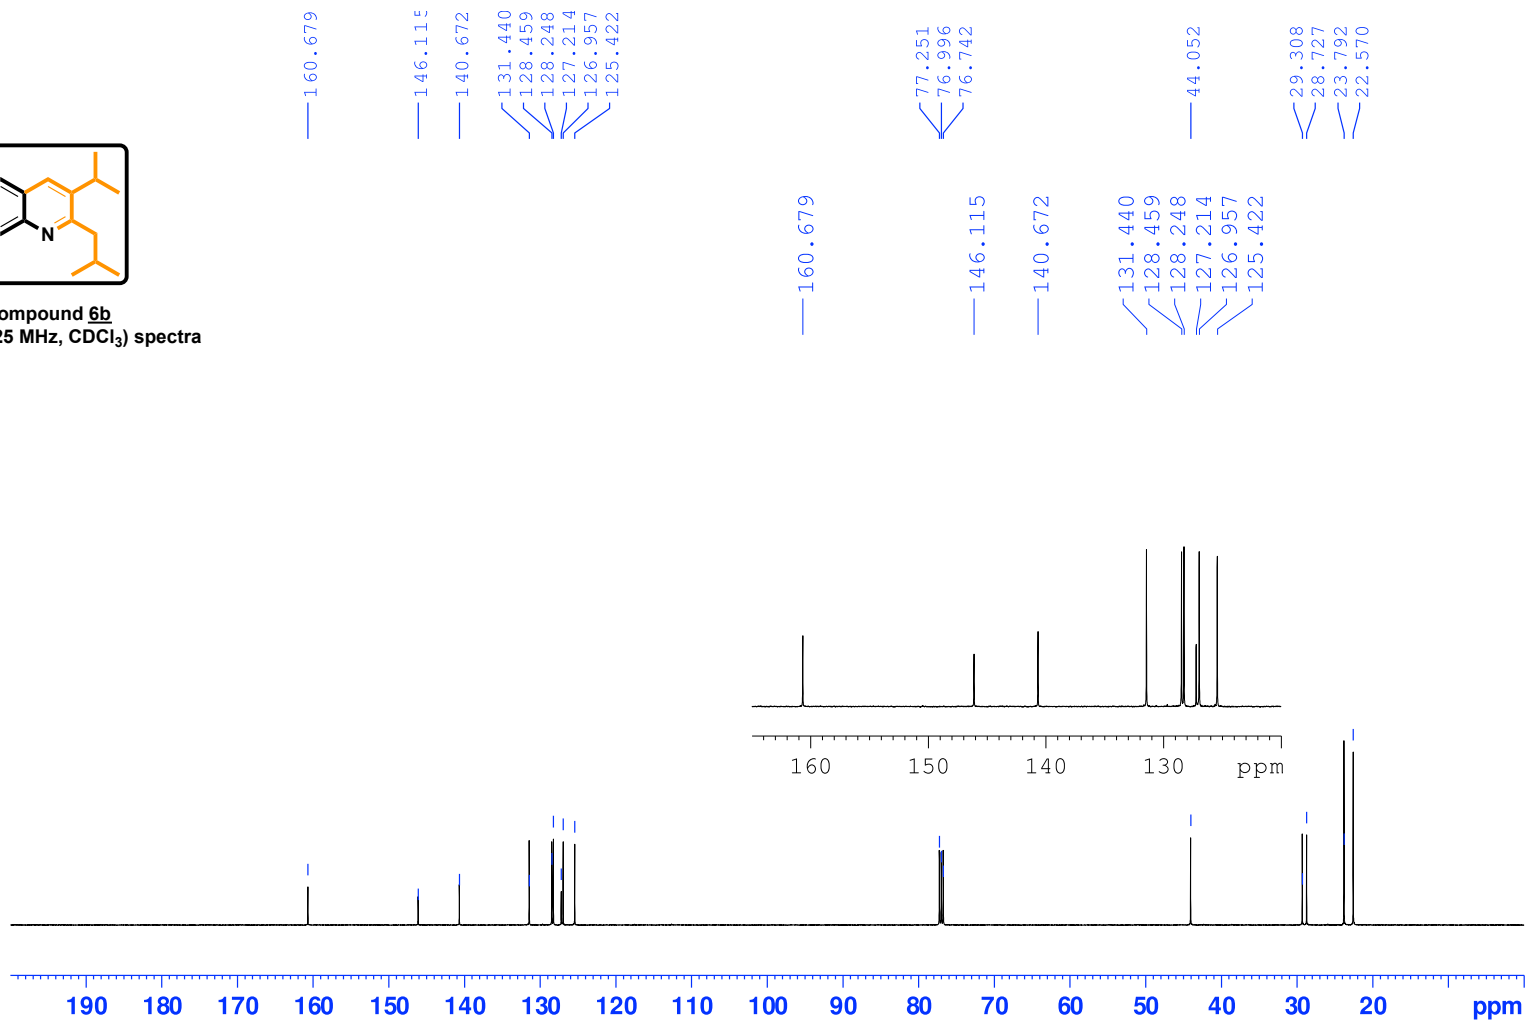

# Compound 6c

1H CYL-403 sep53-55 0924

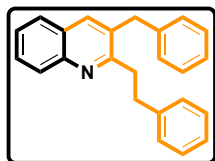

**Compound 6c**  
<sup>1</sup>H NMR (500 MHz, CDCl<sub>3</sub>) spectra

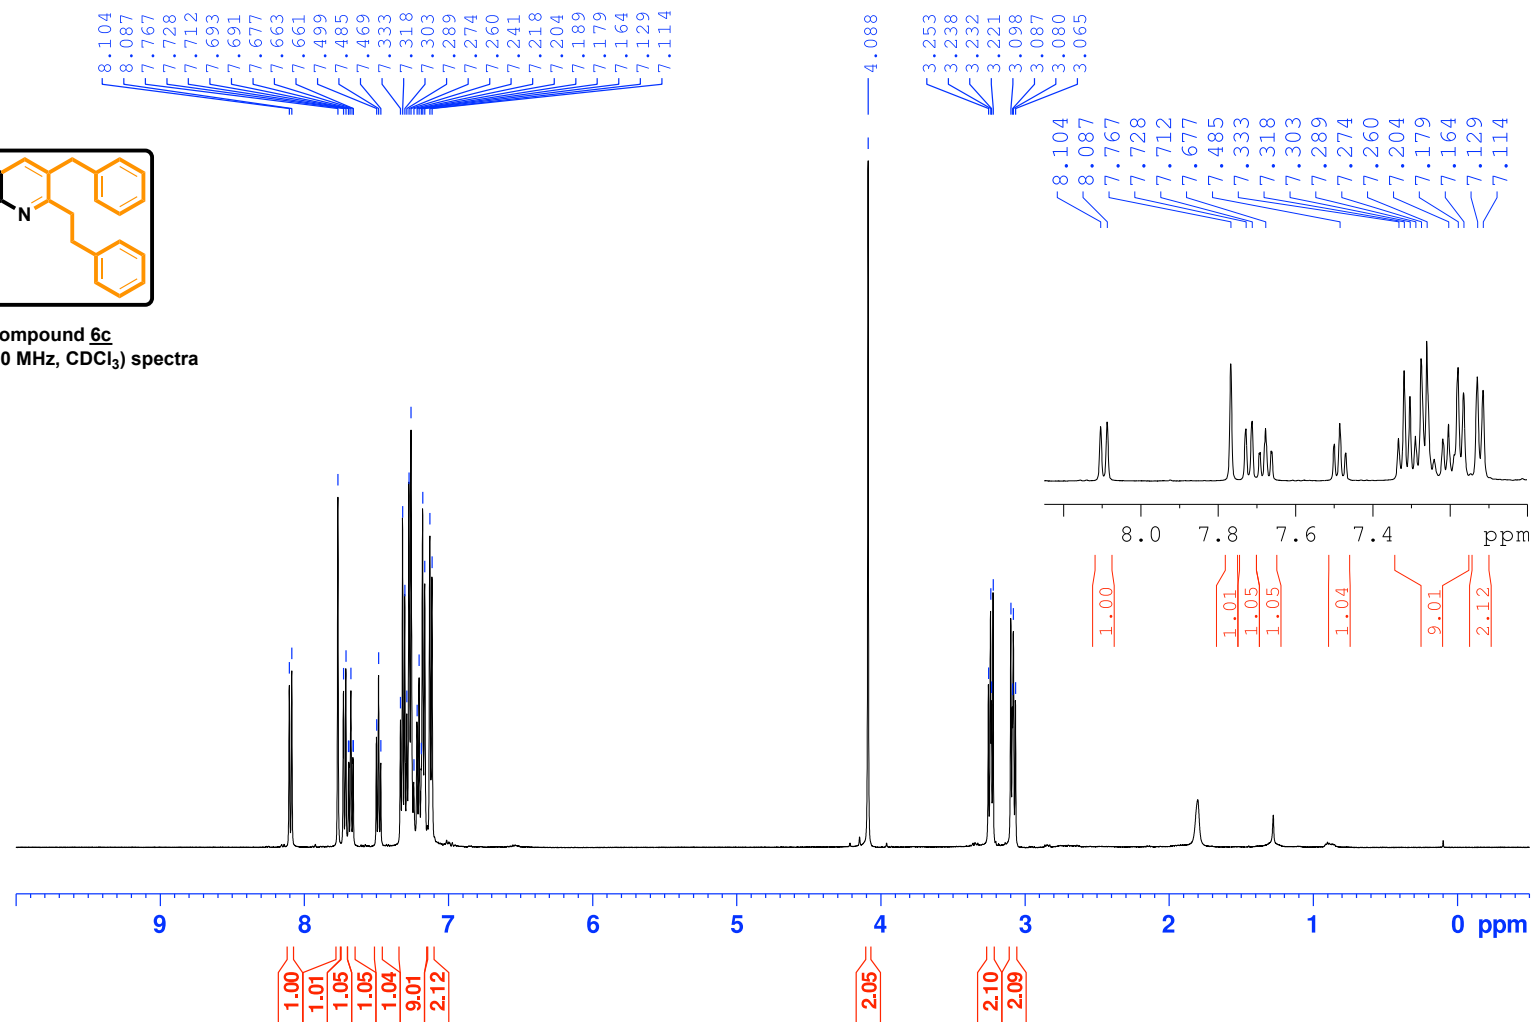

# Compound 6c

13C CYL-403 sep53-55 0924

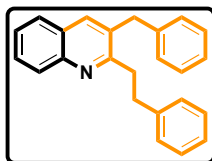

Compound 6c  
<sup>13</sup>C NMR (125 MHz, CDCl<sub>3</sub>) spectra

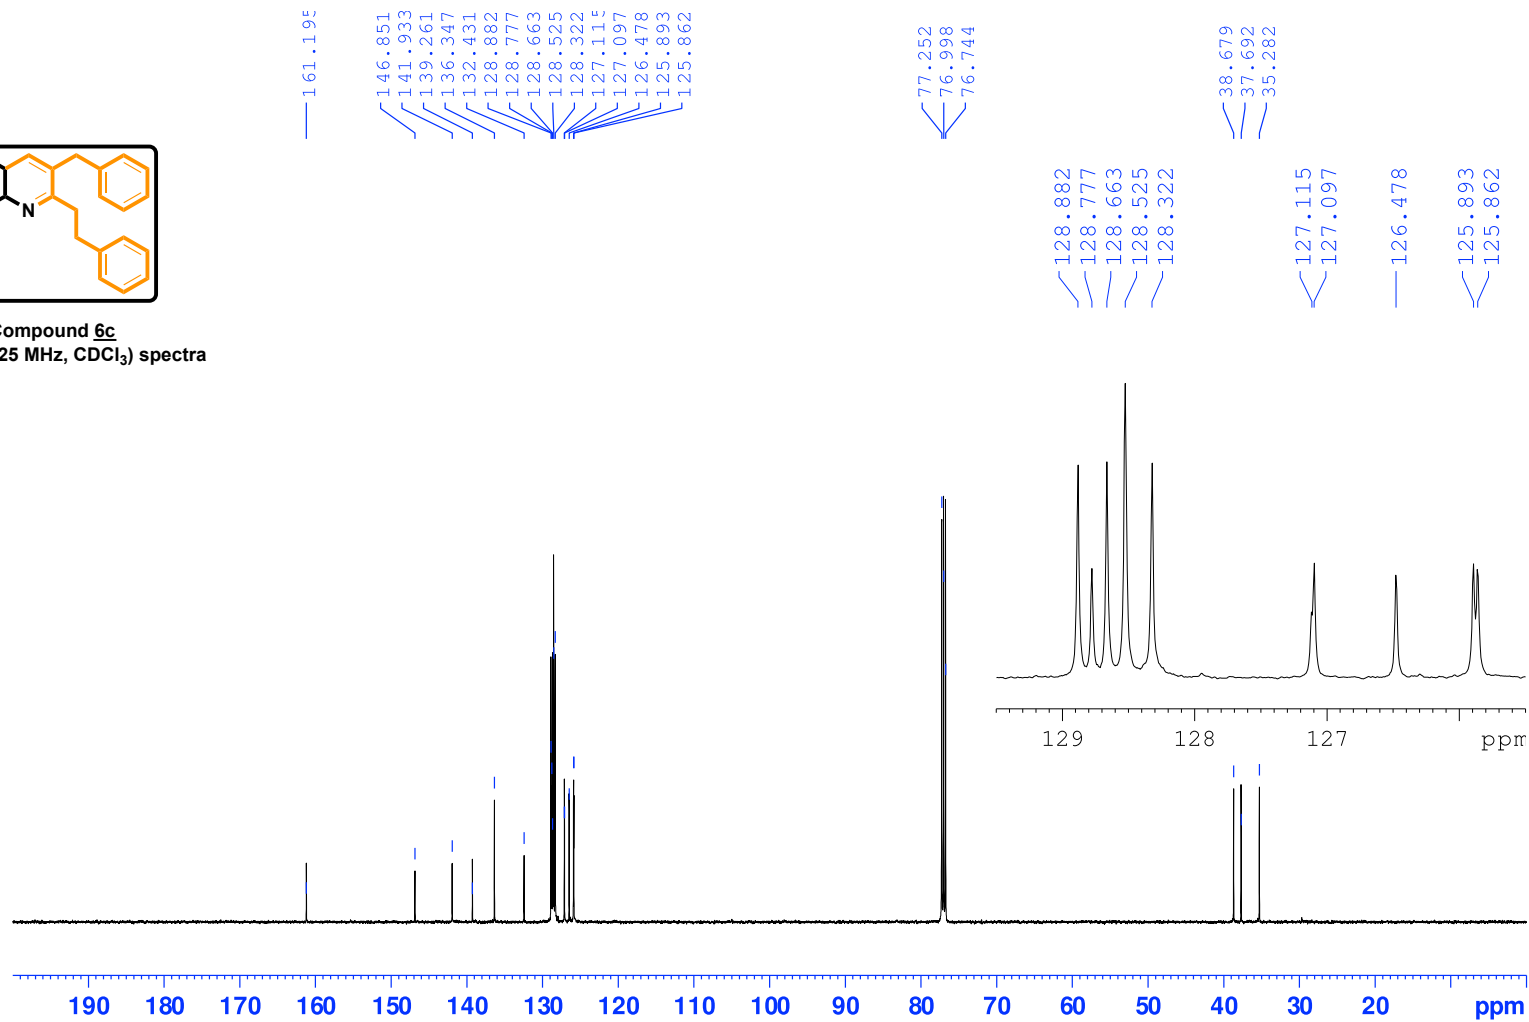

# Compound 6d

1H CYL-502 sep29-30 1102

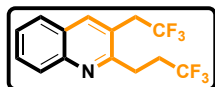

Compound 6d

<sup>1</sup>H NMR (500 MHz, CDCl<sub>3</sub>) spectra

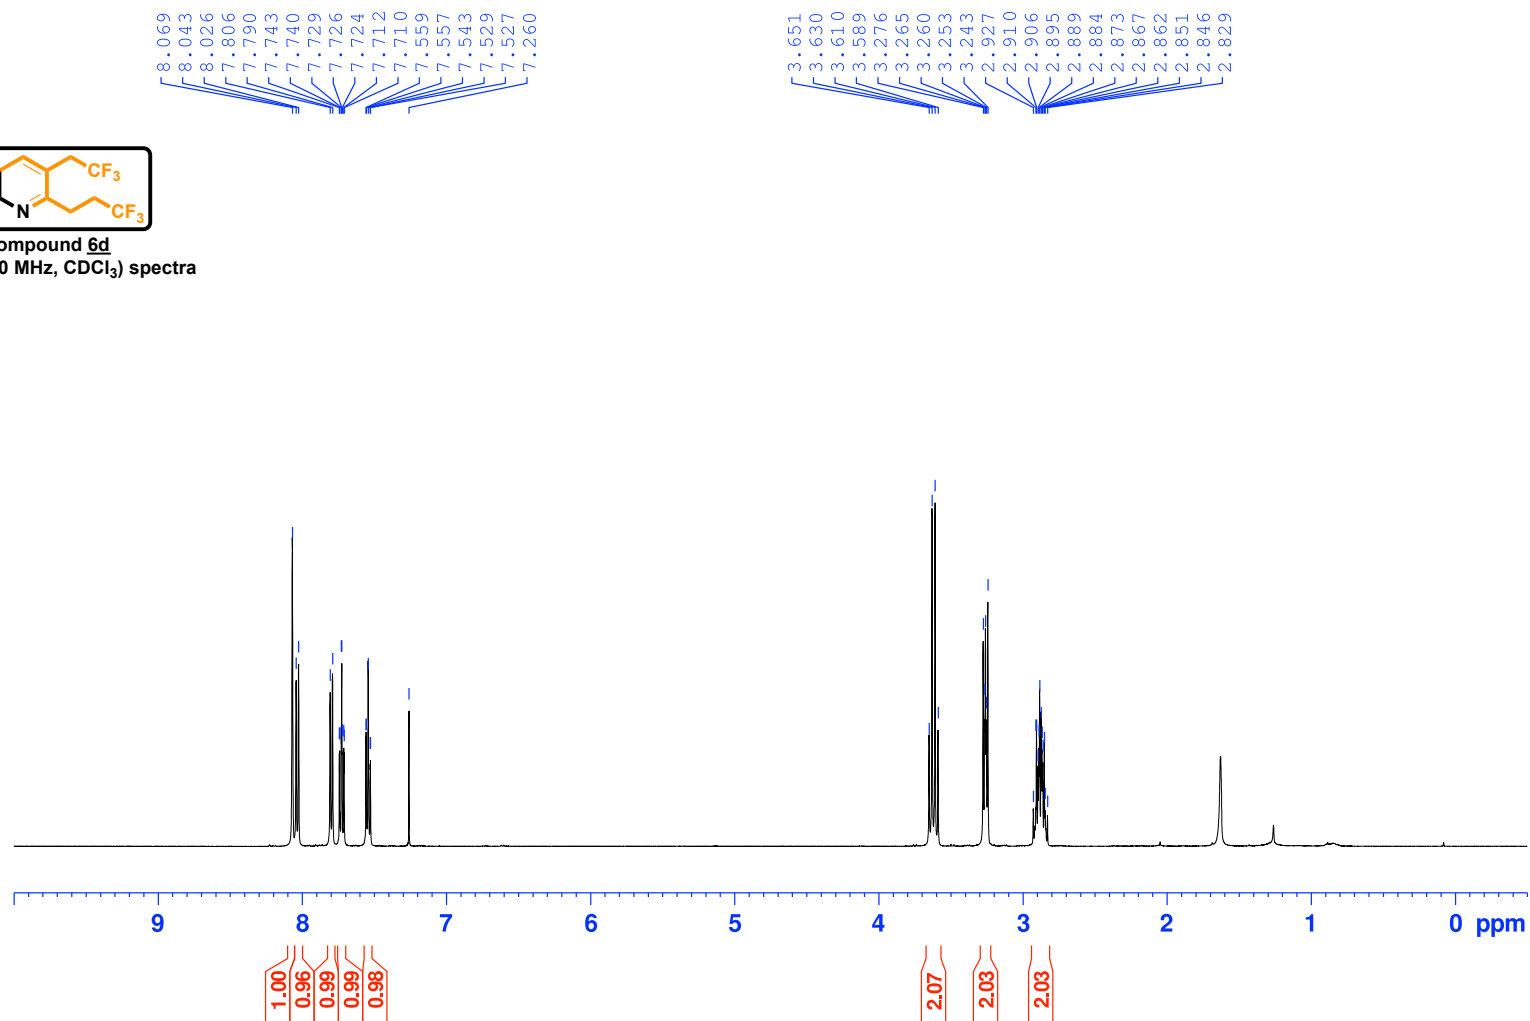



# Compound 6d

13C CYL-502 sep29-30 1102

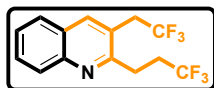

Compound 6d  
<sup>13</sup>C NMR (125 MHz, CDCl<sub>3</sub>) spectra

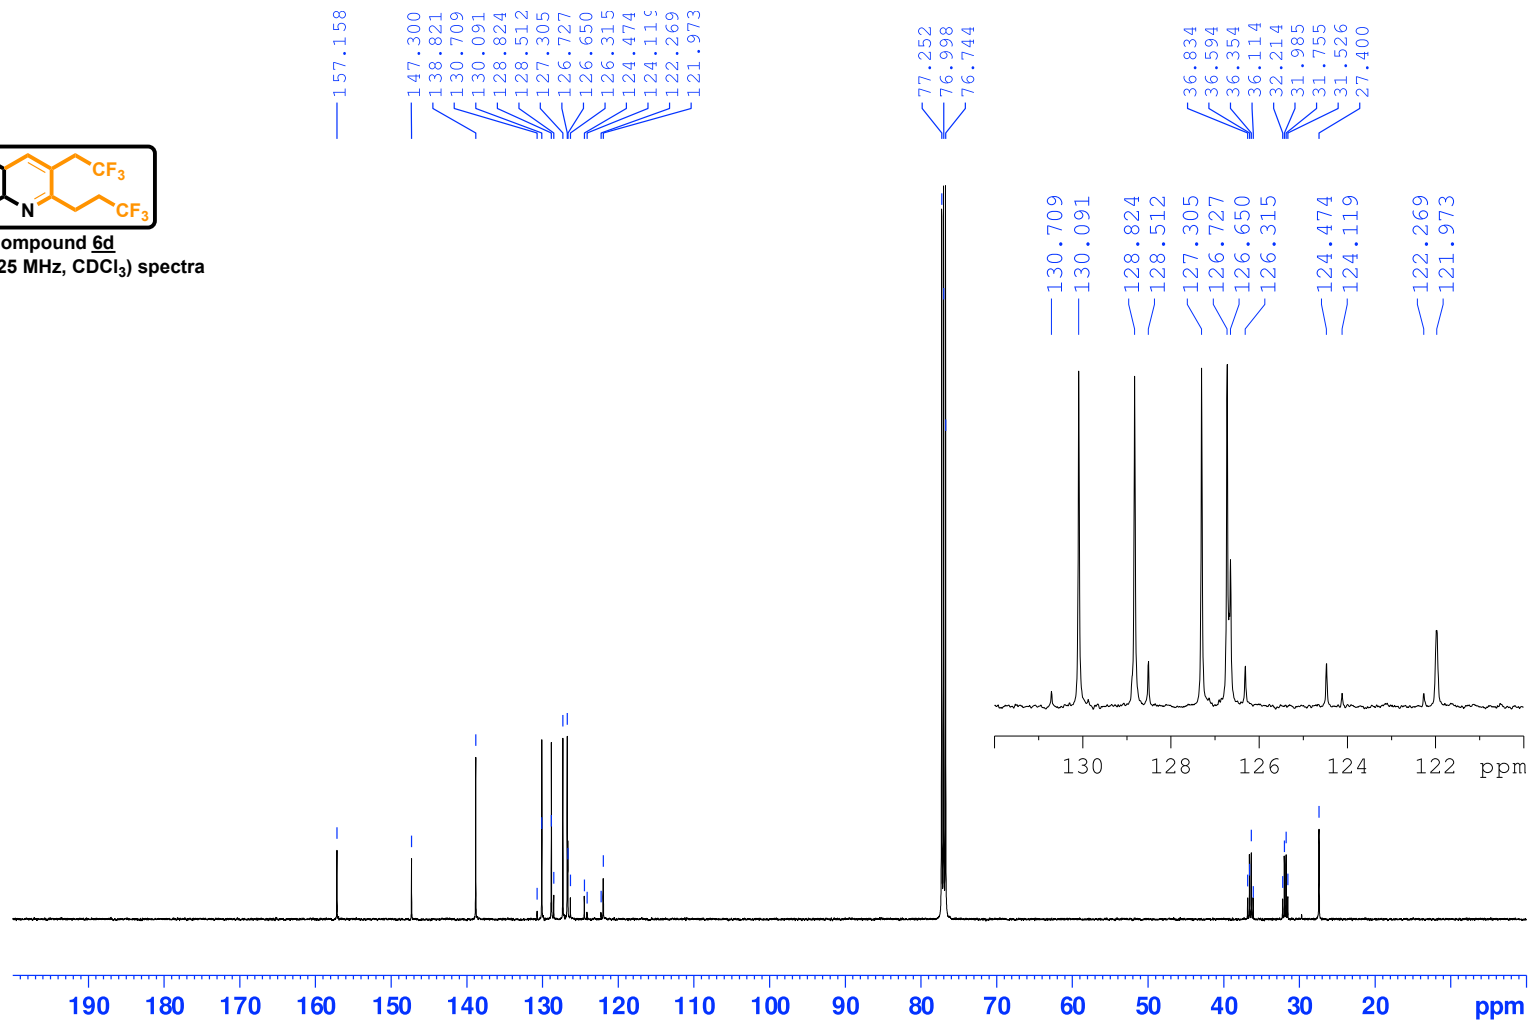

# Compound 6e

1H CYL-407 sep26-27 1126

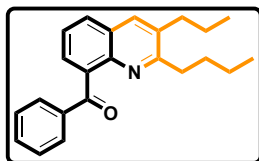

Compound 6e

<sup>1</sup>H NMR (500 MHz, CDCl<sub>3</sub>) spectra

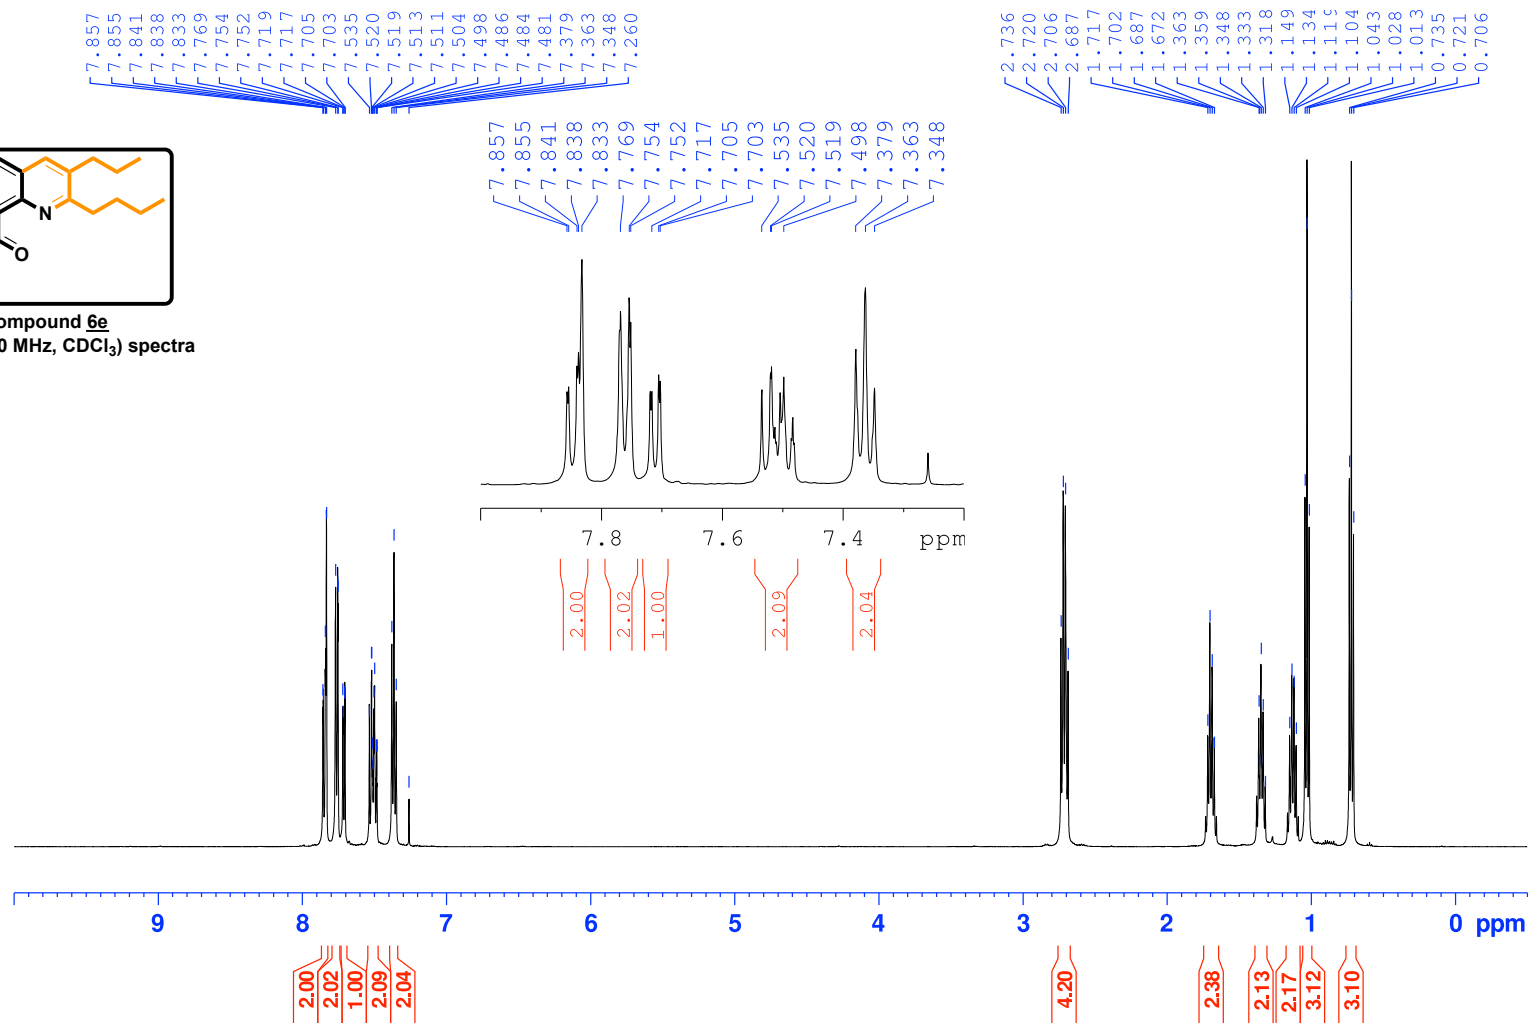

# Compound 6e

13C CYL-407 sep26-27 1126

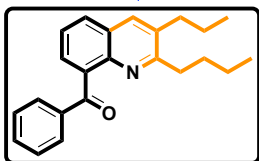

Compound 6e

<sup>13</sup>C NMR (125 MHz, CDCl<sub>3</sub>) spectra

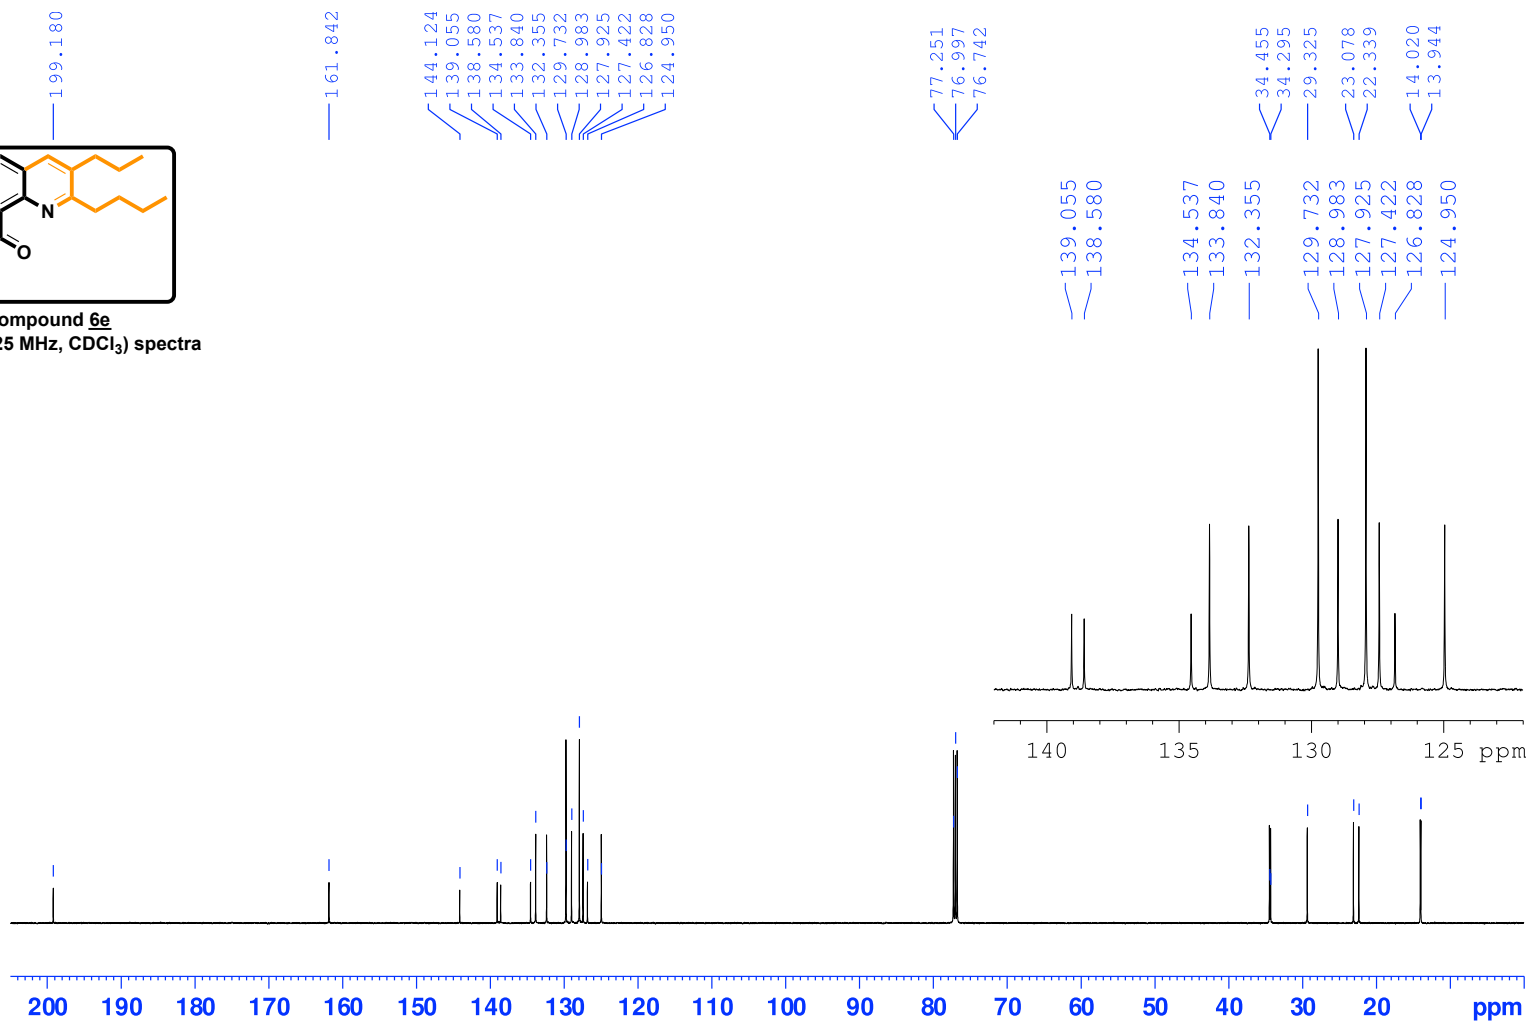

# Compound 6f

1H CYL-409 sep24-25 1127

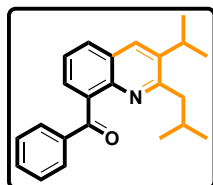

Compound 6f  
<sup>1</sup>H NMR (500 MHz, CDCl<sub>3</sub>) spectra

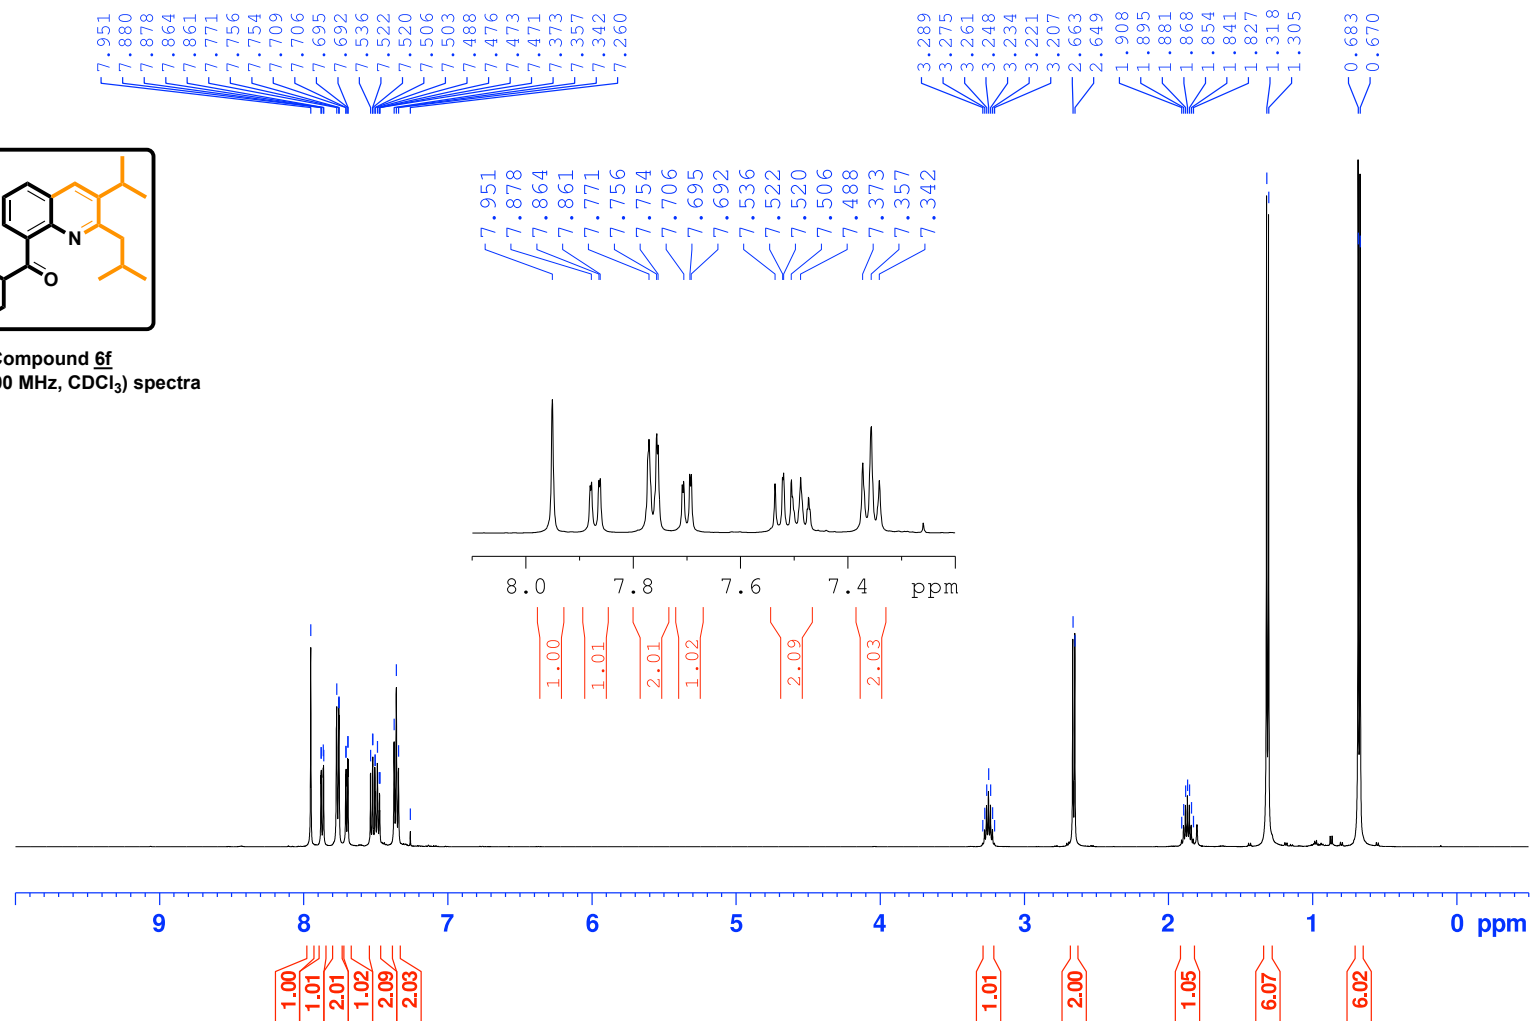

# Compound 6f

13C CYL-409 sep24-25 1127

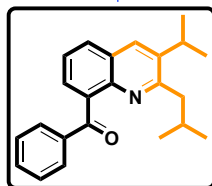

Compound 6f  
<sup>13</sup>C NMR (125 MHz, CDCl<sub>3</sub>) spectra

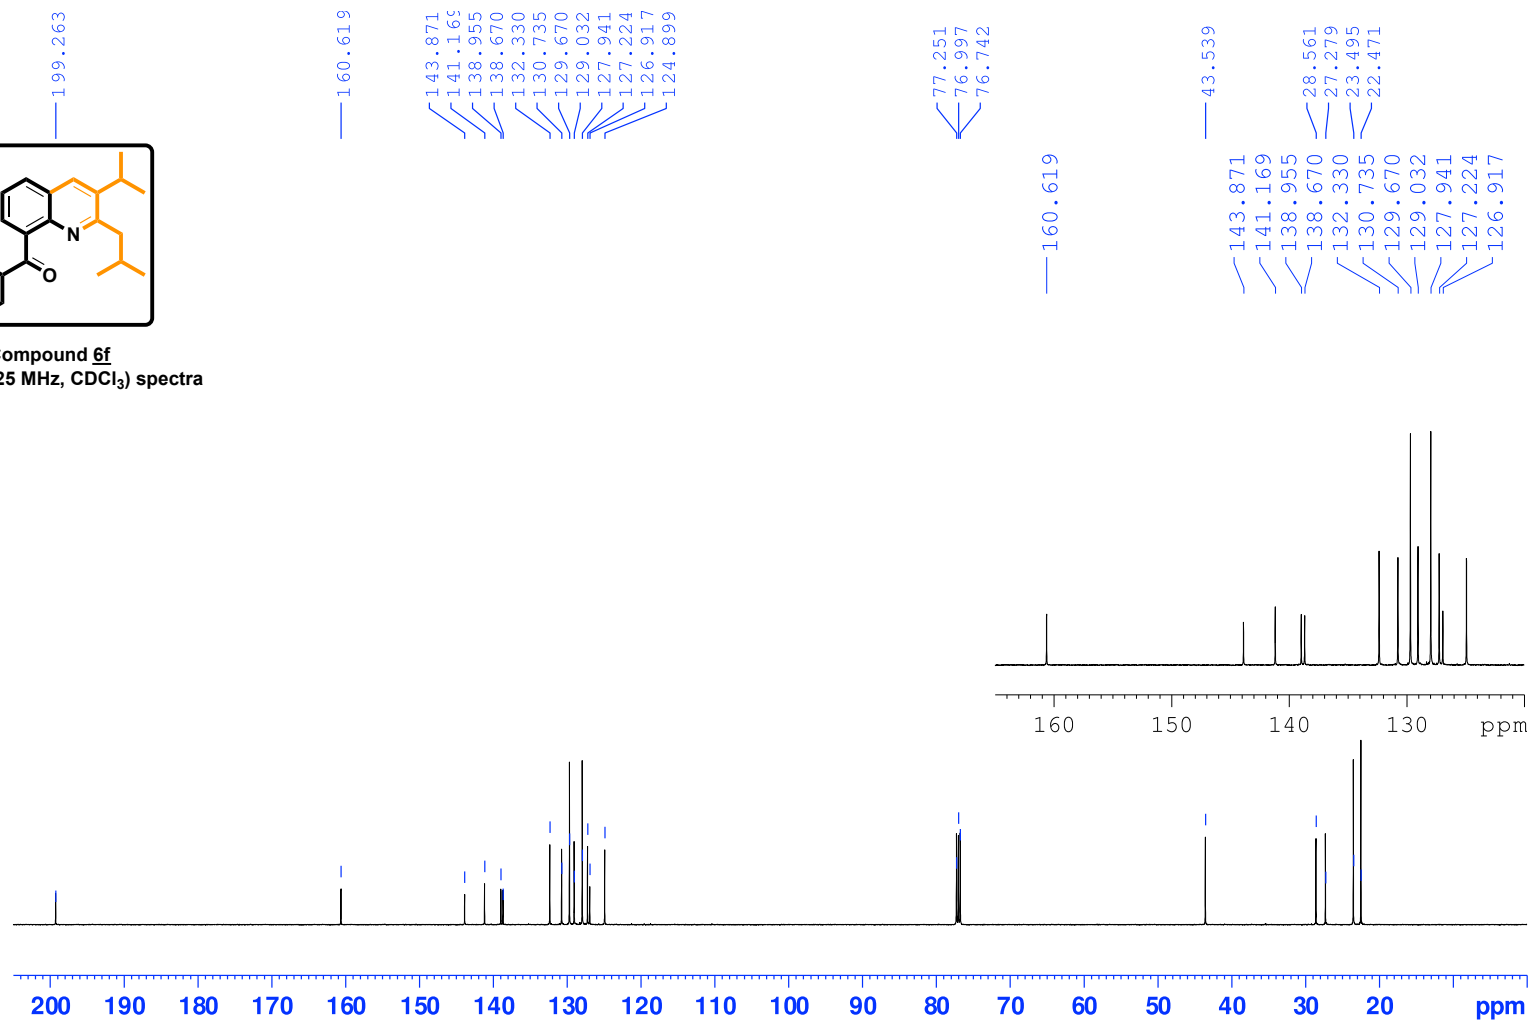

# Compound 6g

1H CYL-405 sep28-29 1117

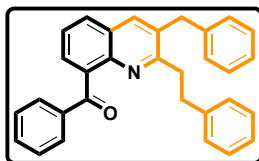

**Compound 6g**  
<sup>1</sup>H NMR (500 MHz, CDCl<sub>3</sub>) spectra

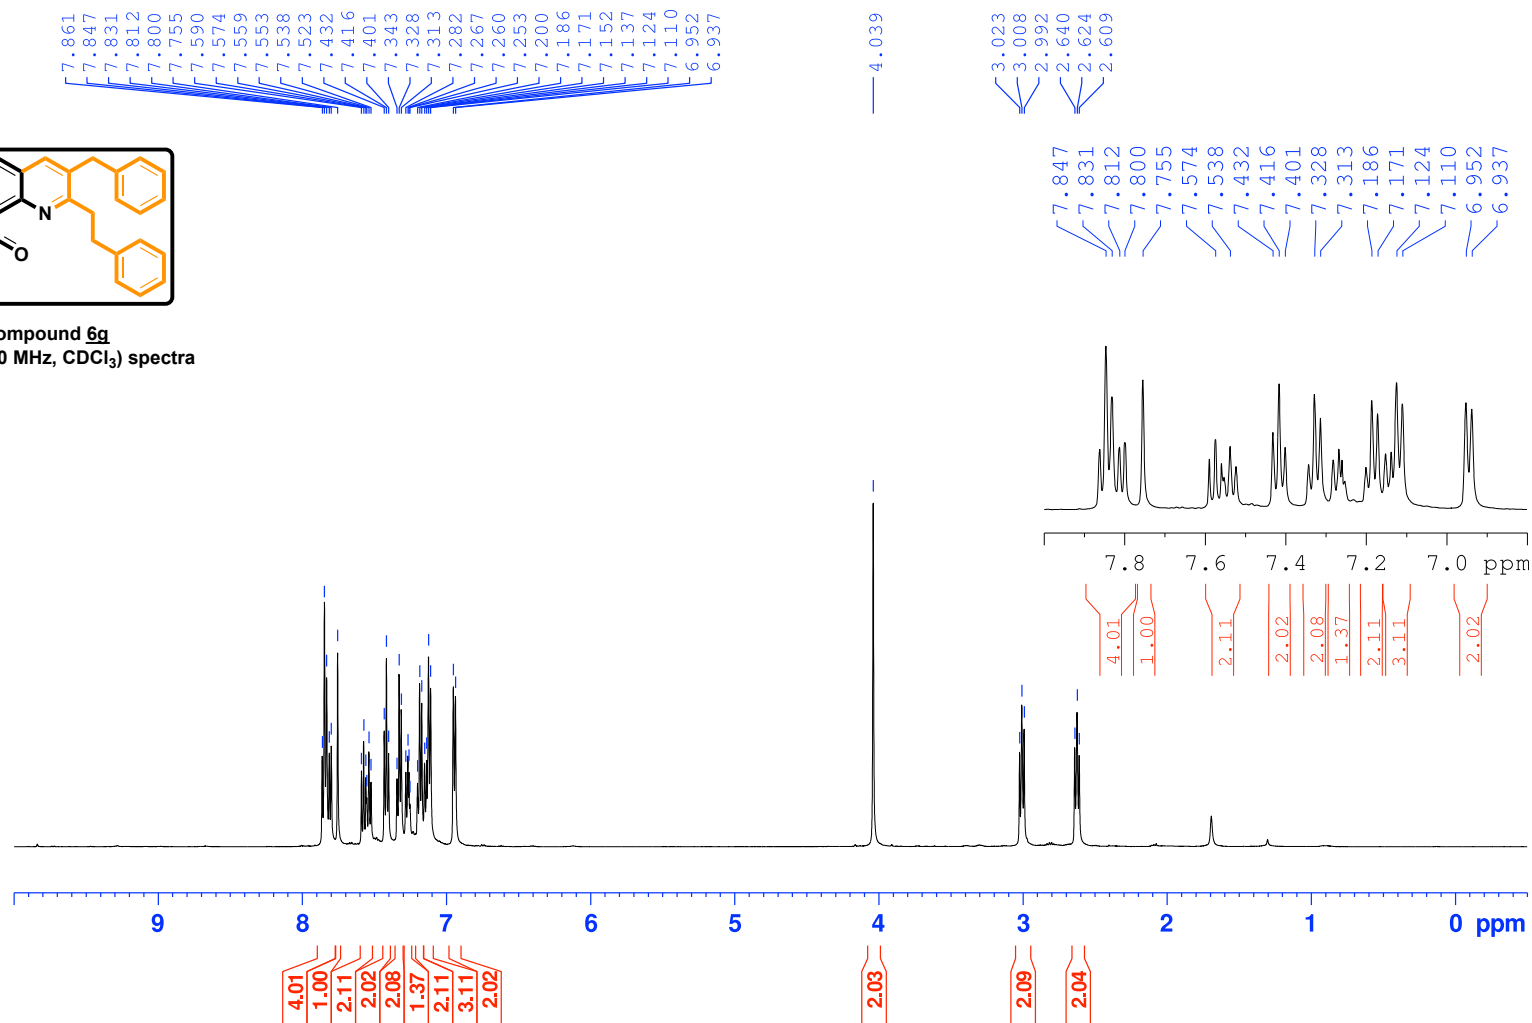

# Compound 6g

13C CYL-405 sep28-29 1117

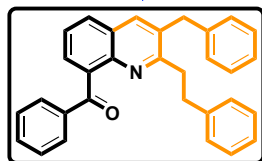

**Compound 6g**  
<sup>13</sup>C NMR (125 MHz, CDCl<sub>3</sub>) spectra

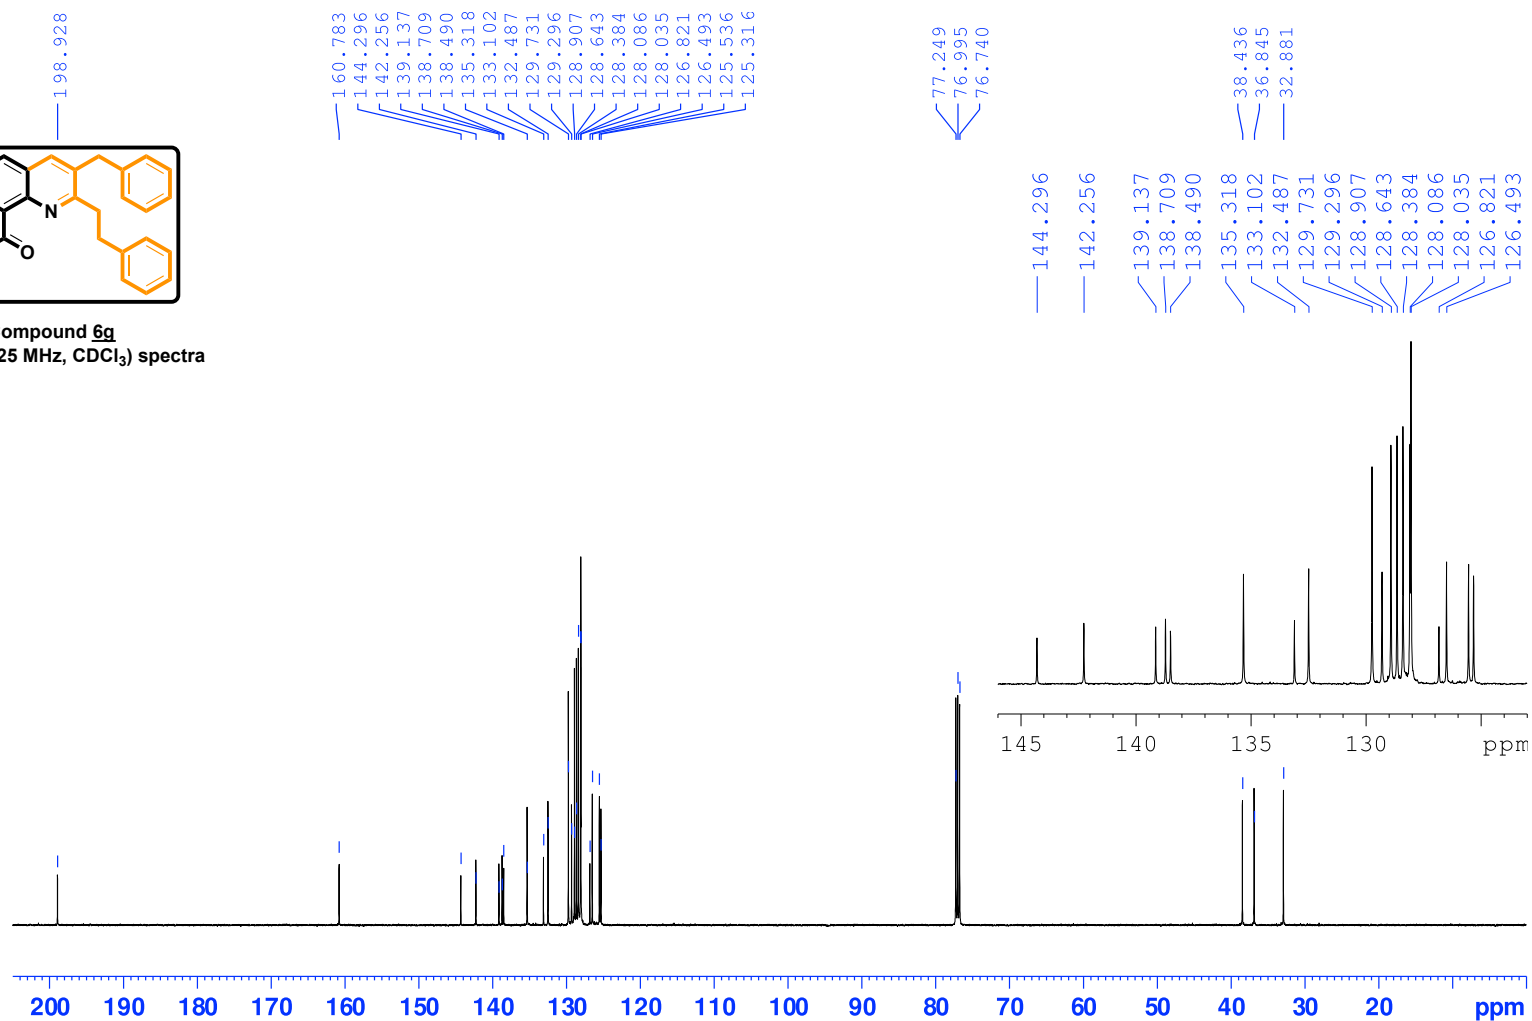

# Compound 6h

1H CYL-507 sep08-09 1105

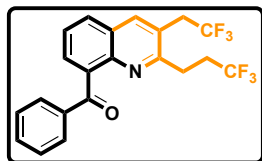

Compound 6h

<sup>1</sup>H NMR (500 MHz, CDCl<sub>3</sub>) spectra

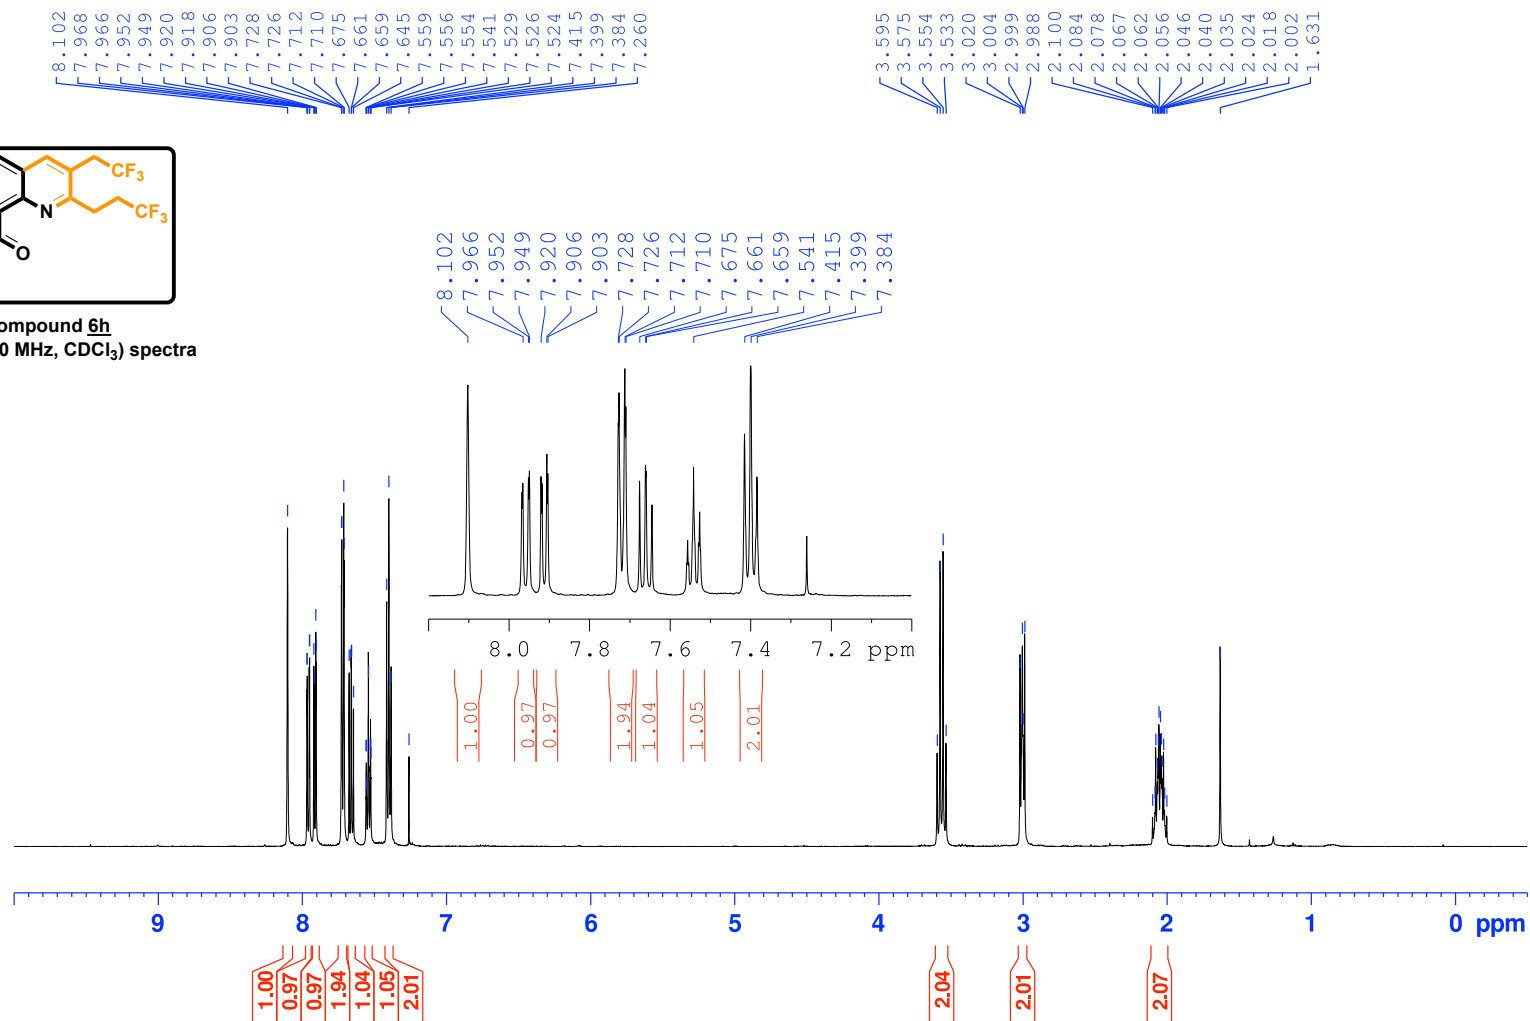



# Compound 6h

13C CYL-507 sep08-09 1105

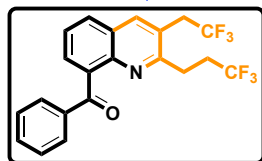

Compound 6h  
<sup>13</sup>C NMR (125 MHz, CDCl<sub>3</sub>) spectra

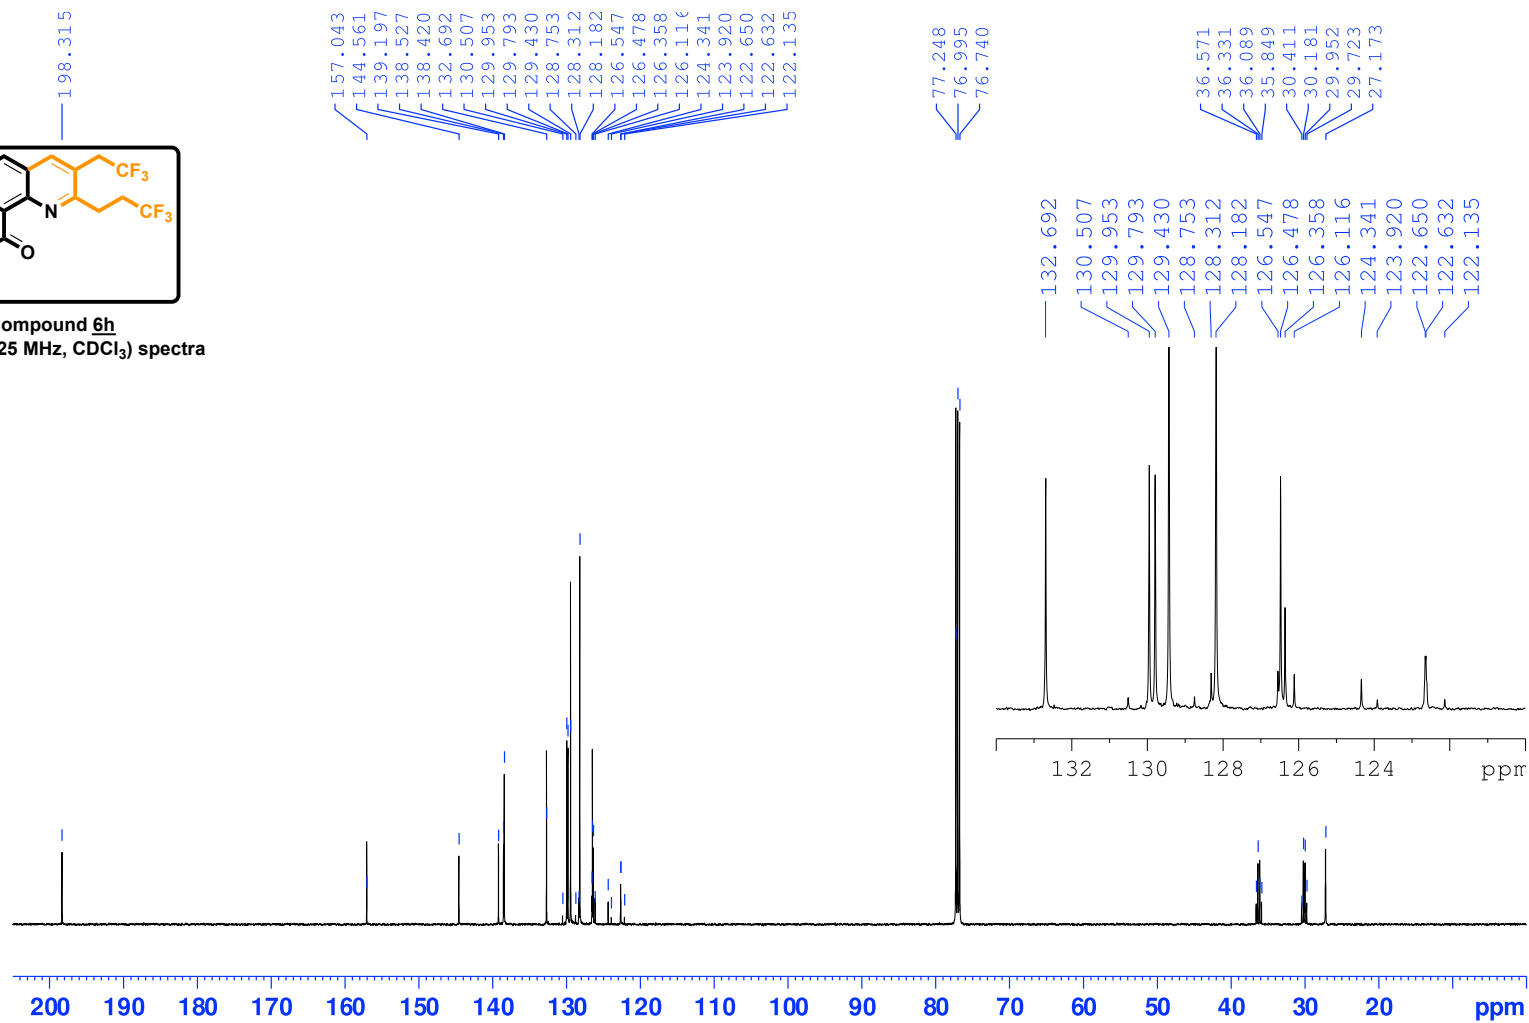

# Compound 7

1H CYL-507 sep20-21 1106

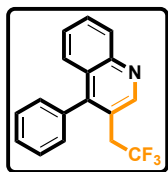

Compound 7  
<sup>1</sup>H NMR (500 MHz, CDCl<sub>3</sub>) spectra

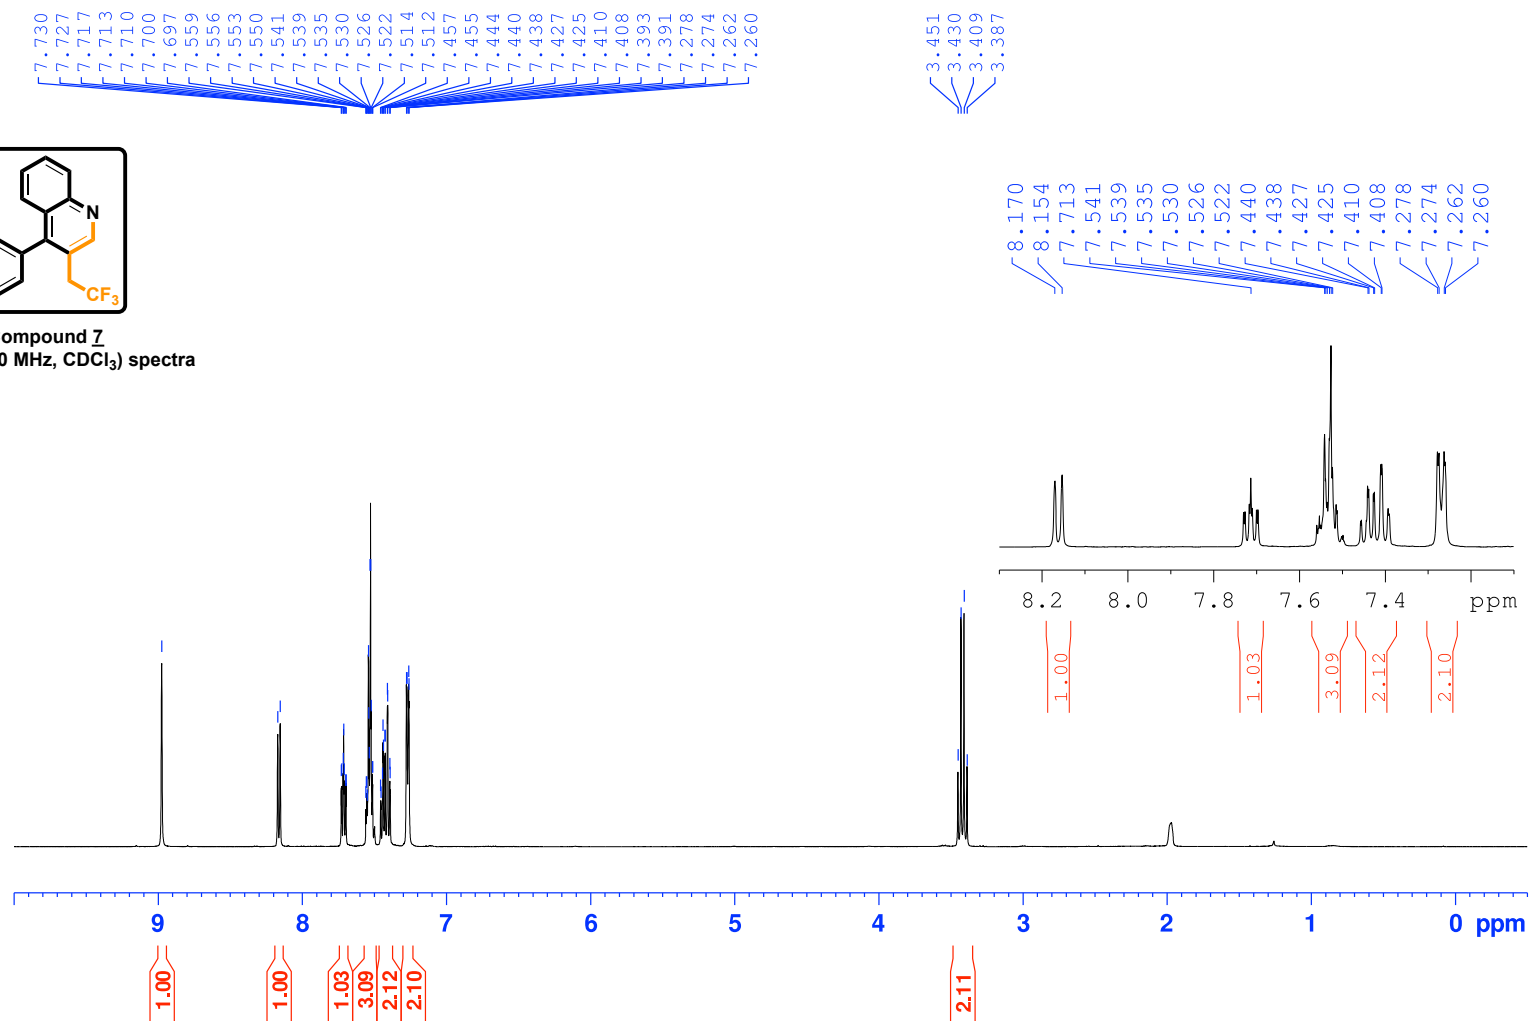

# Compound 7

13C CYL-507 sep20-21 1106

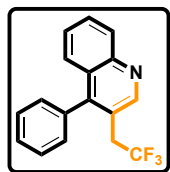

Compound 7  
<sup>13</sup>C NMR (125 MHz, CDCl<sub>3</sub>) spectra

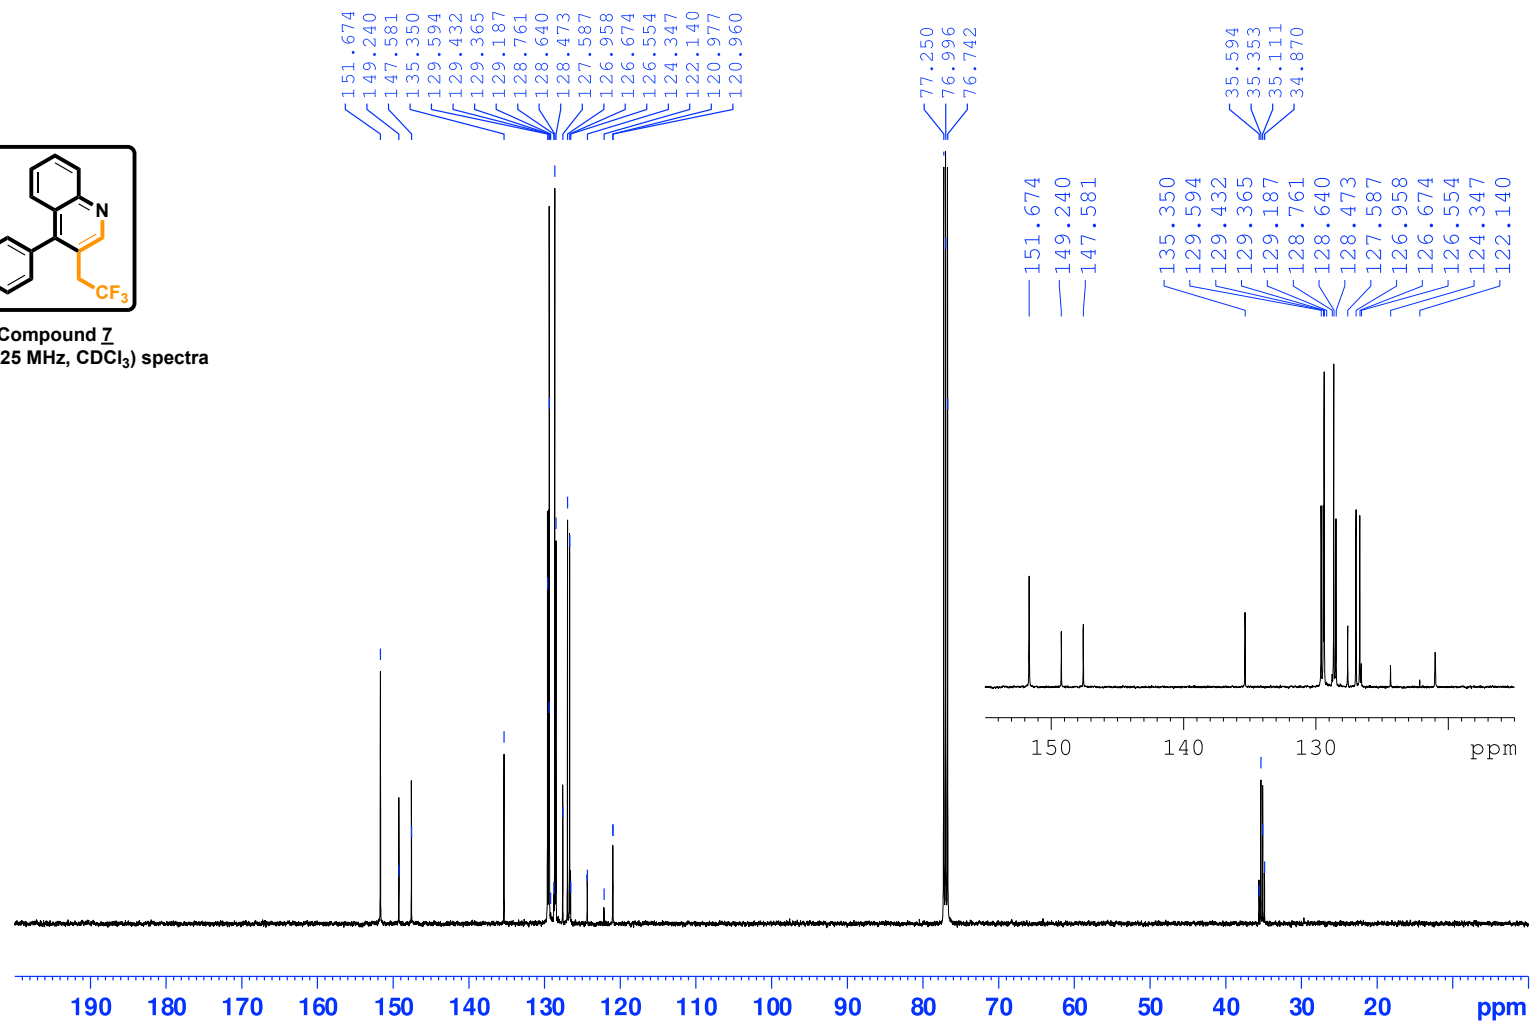

Supplement: s1 [file s1]
